# Supplementary material for: The Landscape of Autophagy-Related (ATG) Genes and Functional Characterization of TaVAMP727 to Autophagy in Wheat
Source: Int J Mol Sci. 2022 Jan 14;23(2):891. doi: 10.3390/ijms23020891 (PMC8776105; doi:10.3390/ijms23020891)
Supplement: Supplementary file 1 [file ijms-23-00891-s001.zip]

Archive with 7 entries (7 files):
- Supplementary_Figures.pdf
- Table S1.xlsx
- Table S2.xlsx
- Table S3.xlsx
- Table S4.xlsx
- Table S5.xlsx
- Table S6.xlsx
