# Supplementary material for: The Landscape of Autophagy-Related (ATG) Genes and Functional Characterization of TaVAMP727 to Autophagy in Wheat
Source: Int J Mol Sci. 2022 Jan 14;23(2):891. doi: 10.3390/ijms23020891 (PMC8776105; doi:10.3390/ijms23020891)
Supplement: Supplementary file 1 [file ijms-23-00891-s001.zip › Table S1.xlsx]

## Sheet: Additional file 1
Additional file 1. Overview subfamilies, names and numbers of ATGs in wheat and its progenitors
Subfamily	Subfamily members					Gene location			Gene number			Possiable evolution events
	Ta	Td	Tu	Aet		Genomes	Chr		Ta A:B:D	Td A:B	Ta:Td:Tu:Aet
ATG1	Ta4A_ATG1a, Ta4D_ATG1b	Tt4A_ATG1a	TuS0_ATG1a	Aet4D_ATG1a		A, D	chr4		1:0:1	1:0	2:1:1:1	ATG1 absent in B genome
ATG2	Ta6A_ATG2a, Ta6B_ATG2b	Tt6A_ATG2a, Tt6B_ATG2b	Tu6A_ATG2a	Aet6D_ATG2a		A,B,D	chr6		1:1:0	1:1	2:2:1:1	Gene loss
ATG3	Ta1A_ATG3a, Ta1B_ATG3b, Ta1D_ATG3c	Tt1A_ATG3a, Tt1B_ATG3b	Tu1A_ATG3a	Aet1D_ATG3a		A,B,D	chr1		1:1:1	1:1	3:2:1:1
ATG4	Ta2A_ATG4a, TaUn_ATG4b, Ta2D_ATG4c	Tt2A_ATG4a, Tt2B_ATG4b	Tu2A_ATG4a	Aet2D_ATG4a		A,B,D	chr2		1:(1):1	1:1	3:2:1:1
ATG5	Ta6A_ATG5a, Ta6A_ATG5b, Ta6B_ATG5c, Ta6B_ATG5d, TaU0_ATG5e	Tt6A_ATG5a, Tt6B_ATG5b	Tu6A_ATG5a, Tu6A_ATG5b	Aet6D_ATG5a		A,B,D	chr6		2:2:(1)	1:1	5:2:2:1	Intra chromosome replication
ATG6	Ta3A_ATG6a, Ta3D_ATG6b	Tt3A_ATG6a	Tu3A_ATG6a	Aet3D_ATG6a		A,D	chr3		1:0:1	1:0	2:1:1:1	ATG6 absent in B genome
ATG7	Ta2D_ATG7a	Tt2A_ATG7a		Aet2D_ATG7a		A,D	chr2		0:0:1	1:0	4:3:1:2	Interchromosomal gene replication
	Ta3A_ATG7b, Ta3B_ATG7c, Ta3D_ATG7d	Tt3A_ATG7b, Tt3B_ATG7c	Tu3A_ATG7a	Aet3D_ATG7b		A,B,D	chr3		1:1:1	1:1
ATG8		Tt1B_ATG8a				B	chr1		0:0:0	0:1	9:7:3:3	ATG8 sub family expand in B genome
	Ta2A_ATG8a, Ta2A_ATG8b, Ta2B_ATG8c, Ta2B_ATG8d, Ta2D_ATG8e	Tt2A_ATG8b, Tt2B_ATG8c, Tt2B_ATG8d	Tu2A_ATG8a, Tu2A_ATG8b	Aet2D_ATG8a, Aet2D_ATG8b		A,B,D	chr2		2:2:1	1:2		Intra chromosome replication
	Ta5A_ATG8f, Ta5B_ATG8g, Ta5D_ATG8h	Tt5A_ATG8e, Tt5B_ATG8f	Tu5A_ATG8c	Aet5D_ATG8c		A,B,D	chr5		1:1:1	1:1		Gene gain and gene loss
	Ta6B_ATG8i	Tt6B_ATG8g				B	chr6		0:1:0	0:1
ATG9	Ta4A_ATG9a, Ta4B_ATG9b, Ta4D_ATG9c	Tt4A_ATG9a, Tt4B_ATG9b	Tu4A_ATG9a	Aet4D_ATG9a		A,B,D	chr4		1:1:1	1:1	3:2:1:1
ATG10	Ta2A_ATG10a, Ta2B_ATG10b	Tt2A_ATG10a, Tt2B_ATG10b	Tu2A_ATG10a	Aet2D_ATG10a		A,B,D	chr2		1:1:0	1:1	2:2:1:1	Gene loss
ATG11	Ta6A_ATG11a, Ta6B_ATG11b, Ta6D_ATG11c	Tt6A_ATG11a, Tt6B_ATG11b	Tu6A_ATG11a	Aet6D_ATG11a		A,B,D	chr6		1:1:1	1:1	3:2:1:1
ATG12	Ta6A_ATG12a, Ta6B_ATG12b, Ta6D_ATG12c	Tt6A_ATG12a, Tt6B_ATG12b	Tu6A_ATG12a	Aet6D_ATG12b, Aet6D_ATG12a		A,B,D	chr6		1:1:1	1:1	4:3:2:3	Intra chromosome replication
	Ta7B_ATG12d	Tt7B_ATG12c	Tu7A_ATG12b	Aet7D_ATG12c		A,B,D	chr7		0:1:0	0:1		Interchromosomal gene replication
ATG13	Ta2A_ATG13a, Ta2B_ATG13b, Ta2D_ATG13c	Tt2A_ATG13a, Tt2B_ATG13b	Tu2A_ATG13a	Aet2D_ATG13a		A,B,D	chr2		1:1:1	1:1	9:6:2:3
	Ta4A_ATG13d, Ta4B_ATG13e, Ta4D_ATG13f	Tt4A_ATG13c, Tt4B_ATG13d	Tu4A_ATG13b	Aet4D_ATG13b		A,B,D	chr4		1:1:1	1:1
	Ta6A_ATG13g, Ta6B_ATG13h, Ta6D_ATG13i	Tt6A_ATG13e, Tt6B_ATG13f		Aet6D_ATG13c		A,B,D	chr6		1:1:1	1:1		Gene loss
ATG14	Ta1A_ATG14a, Ta1B_ATG14b, Ta1D_ATG14c	Tt1A_ATG14a	Tu1A_ATG14a			A,B,D	chr1		1:1:1	1:0	9:3:3:1
	Ta2A_ATG14d, Ta2B_ATG14e, Ta2D_ATG14f	Tt2A_ATG14b	Tu2A_ATG14b			A,B,D	chr2		1:1:1	1:0		ATG14 absent in B genome, chromosome exchange
	Ta5A_ATG14g, Ta5B_ATG14h, Ta5D_ATG14i	Tt5A_ATG14c	Tu5A_ATG14c	Aet5D_ATG14a		A,B,D	chr5		1:1:1	1:0
ATG16	Ta5D_ATG16a	Tt5A_ATG16a	Tu5A_ATG16a	Aet5D_ATG16a		A,D	chr5		0:0:1	1:0	1:1:1:1	ATG16 absent in B genome, gene loss
ATG18	Ta1D_ATG18a	Tt1A_ATG18a, Tt1B_ATG18b	Tu1A_ATG18a	Aet1D_ATG18a		A,B,D	chr1		0:0:1	1:1	4:5:3:4
	Ta3B_ATG18c, Ta3B_ATG18b	Tt3A_ATG18c, Tt3B_ATG18d	Tu3A_ATG18b	Aet3D_ATG18b, Aet3D_ATG18c		A,B,D	chr3		0:2:0	1:1		Gene loss, Intra chromosome replication
	Ta6B_ATG18d	Tt6B_ATG18e	Tu6A_ATG18c	Aet6D_ATG18d		A,B,D	chr6		0:1:0	0:1		Gene loss
ATG22	Ta3A_ATG22a, Ta3B_ATG22b, Ta3B_ATG22c, Ta3D_ATG22d, Ta3D_ATG22e	Tt3A_ATG22a, Tt3B_ATG22b	Tu3A_ATG22a	Aet3D_ATG22a		A,B,D	chr3		1:2:2	1:1	5:2:1:1	Intra chromosome replication
ATG27	Ta4A_ATG27a, Ta4B_ATG27b, Ta4D_ATG27c	Tt4A_ATG27a, Tt4B_ATG27b	Tu4A_ATG27a	Aet4D_ATG27a		A,B,D	chr4		1:1:1	1:1	3:2:1:1
ATG101	Ta2A_ATG101a, Ta2D_ATG101b	Tt2A_ATG101a, Tt2B_ATG101b	Tu2A_ATG101a	Aet2D_ATG101a		A,B,D	chr2		1:0:1	1:1	2:2:1:1	Gene loss

## Sheet: Additional file 2
Additional file 2. Characteristics of all identified ATGs
	Name	ID	Len	PI	MW	GRAVY	Sub-cell-location
ATG1	Ta4A_ATG1a	TraesCS4A02G093800.2	711	6.55	77719.2	-0.306	Nuclear
	Ta4D_ATG1b	TraesCS4D02G211300.2	711	6.65	77702.2	-0.295	Nuclear
	Td4A_ATG1a	TRIDC4AG012750.6	715	6.69	78217.8	-0.312	Nuclear
	TuS0_ATG1a	TuG1812S0001661400.01.P01	659	6.35	72525.36	-0.313	Nuclear
	Aet4D_ATG1a	AET4Gv20537800.2	710	6.65	77702.2	-0.295	Nuclear
ATG2	Ta6A_ATG2a	TraesCS6A02G169400.1	1949	5.41	213652	-0.218	Plasma_Membrane
	Ta6B_ATG2b	TraesCS6B02G197400.1	1918	5.23	210382	-0.205	Plasma_Membrane
	Ta7A_ATG2c	TraesCS7A02G208300.1	1934	5.21	212938	-0.306	Nuclear
	Ta7D_ATG2d	TraesCS7D02G210700.1	1933	5.12	213236	-0.307	Nuclear
	Td6A_ATG2a	TRIDC6AG024280.2	1950	5.4	213614	-0.205	Plasma_Membrane
	Td6B_ATG2b	TRIDC6BG029580.1	1403	5.16	154354	-0.217	Plasma_Membrane
	Td7A_ATG2c	TRIDC7AG026260.1	1924	5.21	212089	-0.292	Nuclear
	Tu6A_ATG2a	TuG1812G0600001744.01.P02	1959	5.35	214815	-0.203	Plasma_Membrane
	Tu7A_ATG2b	TuG1812G0700002208.01.P01	1933	5.17	212961	-0.303	Nuclear
	Aet6D_ATG2a	AET6Gv20428700.4	1871	5.14	205207	-0.23	Plasma_Membrane
	Aet7D_ATG2b	AET7Gv20523100.5	1599	4.86	177345	-0.351	Nuclear
ATG3	Ta1A_ATG3a	TraesCS1A02G220200.2	317	4.5	35464.7	-0.457	Cytoplasmic
	Ta1B_ATG3b	TraesCS1B02G233500.3	317	4.49	35541.8	-0.465	Cytoplasmic
	Ta1D_ATG3c	TraesCS1D02G221700.1	317	4.48	35465.6	-0.457	Cytoplasmic
	Td1A_ATG3a	TRIDC1AG033260.2	400	4.82	44160.8	-0.358	Cytoplasmic
	Td1B_ATG3b	TRIDC1BG038640.2	317	4.49	35541.8	-0.465	Cytoplasmic
	Tu1A_ATG3a	TuG1812G0100002597.01.P01	316	4.48	35465.6	-0.457	Cytoplasmic
	Aet1D_ATG3a	AET1Gv20551000.1	317	4.48	35465.6	-0.457	Cytoplasmic
ATG4	Ta2A_ATG4a	TraesCS2A02G584900.1	486	4.72	52605.5	-0.328	Extracellular Chloroplast
	TaUn_ATG4b	TraesCSU02G021900.1	427	6.5	46683.5	-0.265	Extracellular Plasma_Membrane
	Ta2D_ATG4c	TraesCS2D02G601400.1	485	4.69	52413.3	-0.306	Extracellular Chloroplast
	Td2A_ATG4a	TRIDC2AG078880.4	487	4.71	52609.6	-0.303	Extracellular Chloroplast
	Td2B_ATG4b	TRIDC2BG086900.3	484	4.73	52430.3	-0.338	Extracellular Chloroplast
	Tu2A_ATG4a	TuG1812G0200006188.01.P01	486	4.71	52549.5	-0.292	Extracellular Chloroplast
	Aet2D_ATG4a	AET2Gv21242300.2	485	4.69	52413.3	-0.306	Extracellular Chloroplast
ATG5	Ta6A_ATG5a	TraesCS6A02G050200.1	357	5.29	40071.5	-0.358	Cytoplasmic Chloroplast Nuclear
	Ta6A_ATG5b	TraesCS6A02G050300.1	370	5.04	40963.5	-0.309	Cytoplasmic
	Ta6B_ATG5c	TraesCS6B02G066400.1	364	5.09	41000.5	-0.368	Cytoplasmic Chloroplast
	Ta6B_ATG5d	TraesCS6B02G066500.1	370	5	40875.4	-0.287	Cytoplasmic Chloroplast
	TaUn_ATG5e	TraesCSU02G109200.1	370	5.04	41076.6	-0.298	Cytoplasmic Chloroplast
	Td6A_ATG5a	TRIDC6AG006120.1	333	5.39	37182.4	-0.322	Cytoplasmic Chloroplast
	Td6B_ATG5b	TRIDC6BG008620.1	217	4.81	24152.2	-0.527	Nuclear
	Tu6A_ATG5a	TuG1812G0600000509.01.P01	354	5.39	39893.4	-0.336	Cytoplasmic Chloroplast
	Tu6A_ATG5b	TuG1812G0600000510.01.P01	370	4.94	41032.5	-0.323	Cytoplasmic Chloroplast
	Aet6D_ATG5a	AET6Gv20129000.10	370	5.04	41076.6	-0.298	Cytoplasmic Chloroplast
ATG6	Ta3A_ATG6a	TraesCS3A02G266600.1	504	6.12	56654.2	-0.458	Cytoplasmic Mitochondrial Nuclear
	Ta3D_ATG6b	TraesCS3D02G266800.1	505	6.23	56760.3	-0.463	Cytoplasmic Mitochondrial Nuclear
	Td3A_ATG6a	TRIDC3AG039690.1	504	6.12	56592.1	-0.46	Cytoplasmic Nuclear
	Tu3A_ATG6a	TuG1812G0300003119.01.P01	503	6.12	56594.1	-0.466	Cytoplasmic Nuclear
	Aet3D_ATG6a	AET3Gv20641800.1	505	6.12	56661.1	-0.455	Cytoplasmic Nuclear
ATG7	Ta2D_ATG7a	TraesCS2D02G300300.1	516	6.03	57017.3	-0.142	Cytoplasmic
	Ta3A_ATG7b	TraesCS3A02G220600.1	975	5.26	107246	-0.141	Cytoplasmic Nuclear
	Ta3B_ATG7c	TraesCS3B02G250900.2	1020	5.4	112368	-0.164	Cytoplasmic Nuclear
	Ta3D_ATG7d	TraesCS3D02G231900.1	1020	5.51	112542	-0.152	Cytoplasmic Nuclear
	Td2A_ATG7a	TRIDC2AG043750.4	137	7.79	16017.3	-0.564	Mitochondrial
	Td3A_ATG7b	TRIDC3AG033070.11	259	7.72	29600.2	-0.117	Extracellular
	Td3B_ATG7c	TRIDC3BG037510.1	1037	5.92	114393	-0.204	Nuclear
	Tu3A_ATG7a	TuG1812G0300002693.01.P01	1021	5.37	112471	-0.165	Cytoplasmic Nuclear
	Aet2D_ATG7a	AET2Gv20683700.31	313	7.94	35319.8	-0.218	Cytoplasmic
	Aet3D_ATG7b	AET3Gv20543600.2	1035	5.58	114294	-0.182	Cytoplasmic Nuclear
ATG8	Ta2A_ATG8a	TraesCS2A02G224000.1	119	9.63	53848.2	-0.476	Cytoplasmic Mitochondrial Nuclear
	Ta2A_ATG8b	TraesCS2A02G468300.1	119	9.07	13603.8	-0.328	Cytoplasmic Mitochondrial
	Ta2B_ATG8c	TraesCS2B02G274200.1	119	7.78	13568.6	-0.427	Cytoplasmic Mitochondrial Nuclear
	Ta2B_ATG8d	TraesCS2B02G491200.1	119	9.07	13616.8	-0.351	Cytoplasmic Mitochondrial Nuclear
	Ta2D_ATG8e	TraesCS2D02G229900.1	119	7.78	13568.6	-0.427	Cytoplasmic Mitochondrial Nuclear
	Ta5A-ATG8f	TraesCS5A02G158000.1	117	9.45	13419.7	-0.274	Mitochondrial Nuclear
	Ta5B_ATG8g	TraesCS5B02G155700.1	116	9.3	13406.6	-0.261	Mitochondrial Nuclear
	Ta5D_ATG8h	TraesCS5D02G163400.1	109	7.75	12483.4	-0.237	Mitochondrial Nuclear
	Ta5D_ATG8i	TraesCS6B01G214000.1	196	10.04	21775.6	-0.525	Nuclear
	Td1B_ATG8a	TRIDC1BG040870.1	158	9.74	17790.9	-0.447	Nuclear
	Td2A_ATG8b	TRIDC2AG029950.1	141	10.18	15852.5	-0.55	Nuclear
	Td2B_ATG8c	TRIDC2BG033700.1	195	9.56	21917.2	-0.421	Mitochondrial Nuclear
	Td2B_ATG8d	TRIDC2BG071430.1	119	9.07	13616.8	-0.351	Cytoplasmic Mitochondrial
	Td5A_ATG8e	TRIDC5AG026190.1	193	10.34	22301.9	-0.475	Mitochondrial Nuclear
	Td5B_ATG8f	TRIDC5BG027320.1	141	9.17	16226.1	-0.021	Plasma_Membrane Cytoplasmic
	Td6B_ATG8g	TRIDC6BG033160.1	135	9.18	15111.6	-0.673	Nuclear
	Tu2A_ATG8a	TuG1812G0200002392.01.P01	119	8.62	13538.6	-0.362	Cytoplasmic
	Tu2A_ATG8b	TuG1812G0200005163.01.P01	119	9.07	13603.8	-0.328	Cytoplasmic Mitochondrial
	Tu5A_ATG8c	TuG1812G0500001843.01.P01	170	10.13	19956.2	-0.519	Mitochondrial Nuclear
	Aet2D_ATG8a	AET2Gv20476900.2	119	7.78	13568.6	-0.427	Cytoplasmic Mitochondrial Nuclear
	Aet2D_ATG8b	AET2Gv21034400.6	211	10.13	23955.6	-0.467	Mitochondrial
	Aet5D_ATG8c	AET5Gv20401600.4	116	9.14	13406.6	-0.271	Mitochondrial Nuclear
ATG9	Ta4A_ATG9a	TraesCS4A02G079800.1	885	6.21	101043	-0.202	Plasma_Membrane
	Ta4B_ATG9b	TraesCS4B02G224200.1	894	6.19	101751	-0.161	Plasma_Membrane
	Ta4D_ATG9c	TraesCS4D02G224800.1	887	6.15	101389	-0.211	Plasma_Membrane
	Td4A_ATG9a	TRIDC4AG010970.1	416	5.23	47303.3	-0.675	Nuclear
	Td4B_ATG9b	TRIDC4BG039590.1	886	6.19	100896	-0.185	Plasma_Membrane
	Tu4A_ATG9a	TuG1812G0400002621.01.P01	885	6.16	101115	-0.205	Plasma_Membrane
	Aet4D_ATG9a	AET4Gv20566500.2	887	6.15	101361	-0.214	Plasma_Membrane
ATG10	Ta2A_ATG10a	TraesCS2A02G352700.1	216	5.57	24073.4	-0.276	Cytoplasmic
	Ta2B_ATG10b	TraesCS2B02G371600.1	217	5.31	24079.2	-0.335	Cytoplasmic Nuclear
	Td2A_ATG10a	TRIDC2AG051050.1	243	5.64	27225.1	-0.136	Extracellular Cytoplasmic
	Td2B_ATG10b	TRIDC2BG054430.1	194	5.18	21425.3	-0.275	Cytoplasmic Nuclear
	Tu2A_ATG10a	TuG1812G0200004000.01.P02	243	5.77	27314.1	-0.184	Extracellular
	Aet2D_ATG10a	AET2Gv20793400.5	244	5.51	27284	-0.199	Extracellular
ATG11	Ta6A_ATG11a	TraesCS6A02G149000.1	1121	5.79	125025	-0.513	Nuclear
	Ta6B_ATG11b	TraesCS6B02G177000.1	1143	5.86	127539	-0.501	Nuclear
	Ta6D_ATG11c	TraesCS6D02G138400.1	1121	5.77	124955	-0.503	Nuclear
	Td6A_ATG11a	TRIDC6AG020550.1	1083	5.9	121772	-0.543	Nuclear
	Td6B_ATG11b	TRIDC6BG026460.1	1089	5.9	122231	-0.526	Nuclear
	Tu6A_ATG11a	TuG1812G0600001517.01.P01	1143	5.85	127643	-0.515	Nuclear
	Aet6D_ATG11a	AET6Gv20381600.1	1143	5.83	127619	-0.506	Nuclear
ATG12	Ta6A_ATG12a	TraesCS6A02G335800.1	87	9.16	9855.38	0.102	Mitochondrial
	Ta6B_ATG12b	TraesCS6B02G366600.1	92	8.05	10368.9	-0.035	Cytoplasmic Mitochondrial
	Ta6D_ATG12c	TraesCS6D02G315600.1	92	6.72	10316.2	-0.023	Mitochondrial Chloroplast
	Ta7B_ATG12d	TraesCS7B02G070300.1	110	10.03	12508.4	-0.26	Nuclear
	Td6A_ATG12a	TRIDC6AG050230.1	92	8.05	10354.9	-0.059	Cytoplasmic Mitochondrial
	Td6B_ATG12b	TRIDC6BG058770.1	92	8.05	10368.9	-0.035	Cytoplasmic Mitochondrial
	Td7B_ATG12c	TRIDC7BG010490.1	105	10.22	11908.7	-0.325	Nuclear
	Tu6A_ATG12a	TuG1812G0600003592.01.P02	125	8.56	14451.6	-0.198	Nuclear
	Tu7A_ATG12b	TuG1812G0700001764.01.P01	92	9.1	10374.8	-0.254	Cytoplasmic Nuclear
	Aet6D_ATG12a	AET6Gv20824700.1	130	10.07	14287.1	-0.34	Chloroplast Nuclear
	Aet6D_ATG12b	AET6Gv20825000.2	117	9.46	13079	-0.326	Nuclear
	Aet7D_ATG12c	AET7Gv20434100.2	111	10.33	12566.4	-0.432	Mitochondrial Nuclear
ATG13	Ta2A_ATG13a	TraesCS2A02G387200.1	521	8.46	55834.7	-0.46	Nuclear
	Ta2B_ATG13b	TraesCS2B02G404900.1	521	8.17	55852.6	-0.501	Nuclear
	Ta2D_ATG13c	TraesCS2D02G384600.1	521	8.17	55894.7	-0.496	Nuclear
	Ta4A_ATG13d	TraesCS4A02G209500.1	590	6.94	64977.2	-0.527	Nuclear
	Ta4B_ATG13e	TraesCS4B02G112800.1	590	6.92	64958.1	-0.533	Nuclear
	Ta4D_ATG13f	TraesCS4D02G110500.1	574	6.92	63049.9	-0.525	Nuclear
	Ta6A_ATG13g	TraesCS6A02G238900.1	537	8.65	57393.9	-0.494	Nuclear
	Ta6B_ATG13h	TraesCS6B02G285600.1	537	8.57	57391.9	-0.484	Nuclear
	Ta6D_ATG13i	TraesCS6D02G221200.1	535	9	57443.1	-0.493	Nuclear
	Td2A_ATG13a	TRIDC2AG055740.2	541	8.13	57995.2	-0.404	Nuclear
	Td2B_ATG13b	TRIDC2BG058590.2	429	8.25	46190.4	-0.581	Nuclear
	Td4A_ATG13c	TRIDC4AG033270.1	589	6.94	64936.1	-0.535	Nuclear
	Td4B_ATG13d	TRIDC4BG017440.1	590	6.92	64958.1	-0.533	Nuclear
	Td6A_ATG13e	TRIDC6AG036810.1	473	9.65	50878.6	-0.11	Plasma_Membrane Nuclear
	Td6B_ATG13f	TRIDC6BG043600.2	473	9.84	51019.8	-0.132	Plasma_Membrane Nuclear
	Tu2A_ATG13a	TuG1812G0200004379.01.P01	523	8.46	55996.8	-0.471	Nuclear
	Tu4A_ATG13b	TuG1812G0400001081.01.P01	590	6.73	64984.2	-0.524	Nuclear
	Aet2D_ATG13a	AET2Gv20862900.1	427	10.01	45936.2	-0.429	Nuclear
	Aet4D_ATG13b	AET4Gv20238100.1	590	6.94	64934.1	-0.512	Nuclear
	Aet6D_ATG13c	AET6Gv20623700.3	535	9	57443.1	-0.493	Nuclear
ATG14	Ta1A_ATG14a	TraesCS1A02G308000.2	361	9.74	40235.5	-0.565	Nuclear
	Ta1B_ATG14b	TraesCS1B02G318700.1	361	9.8	40234.5	-0.518	Nuclear
	Ta1D_ATG14c	TraesCS1D02G307400.1	357	8.43	39535.6	-0.475	Nuclear
	Ta2A_ATG14d	TraesCS2A02G160200.1	487	9.63	53848.2	-0.476	Nuclear
	Ta2B_ATG14e	TraesCS2B02G186500.1	487	9.63	53880.2	-0.477	Nuclear
	Ta2D_ATG14f	TraesCS2D02G167600.1	487	9.63	53868.1	-0.476	Nuclear
	Ta5A_ATG14g	TraesCS5A02G141000.1	387	5.66	42268.9	-0.356	Nuclear
	Ta5B_ATG14h	TraesCS5B02G139300.1	386	5.66	42116.6	-0.366	Nuclear
	Ta5D_ATG14i	TraesCS5D02G151400.1	388	5.43	42509	-0.368	Nuclear
	Td1A_ATG14a	TRIDC1AG045750.2	253	9.37	28252.1	-0.45	Mitochondrial Nuclear
	Td2A_ATG14b	TRIDC2AG020180.1	474	9.54	52537.7	-0.47	Nuclear
	Td5A_ATG14c	TRIDC5AG023740.1	308	9.13	33965.9	-0.284	Mitochondrial Nuclear
	Tu1A_ATG14a	TuG1812G0100003466.01.P01	361	9.74	40235.5	-0.565	Nuclear
	Tu2A_ATG14b	TuG1812G0200001708.01.P01	487	9.63	53878.2	-0.481	Nuclear
	Tu5A_ATG14c	TuG1812G0500001633.01.P01	387	5.66	42268.9	-0.356	Nuclear
	Aet5D_ATG14a	AET5Gv20368700.2	402	9.06	44144.2	-0.391	Mitochondrial Nuclear
ATG16	Ta5D_ATG16a	TraesCS5D02G394200.1	517	6.58	56305.8	-0.301	Cytoplasmic
	Td5A_ATG16a	TRIDC5AG056260.1	489	6.46	53220.3	-0.29	Cytoplasmic
	Tu5A_ATG16a	TuG1812G0500004136.01.P01	755	9.23	81860.4	-0.508	Nuclear
	Aet5D_ATG16a	AET5Gv20897100.5	518	6.73	56433.9	-0.308	Cytoplasmic
ATG18	Ta1D_ATG18a	TraesCS1D02G253700.1	1015	5.81	109262	-0.316	Nuclear
	Ta3B_ATG18b	TraesCS3B02G490900.1	495	5.33	53401	-0.43	Nuclear
	Ta3B_ATG18c	TraesCS3B02G110900.1	418	8	46403.1	-0.194	Plasma_Membrane
	Ta6B_ATG18d	TraesCS6B02G386200.1	374	8.54	41056.6	-0.158	Plasma_Membrane
	Td1A_ATG18a	TRIDC1AG037940.2	1035	5.53	111325	-0.335	Nuclear
	Td1B_ATG18b	TRIDC1BG043140.5	777	6.64	84176.9	-0.212	Nuclear
	Td3A_ATG18c	TRIDC3AG064120.2	429	6.45	46337.5	-0.265	Chloroplast
	Td3B_ATG18d	TRIDC3BG015410.3	418	8	46403.1	-0.194	Plasma_Membrane
	Td6B_ATG18e	TRIDC6BG061740.2	375	8.56	41127.6	-0.153	Plasma_Membrane
	Tu1A_ATG18a	TuG1812G0100002940.01.P03	1035	5.75	111374.46	-0.306	Nuclear
	Tu3A_ATG18b	TuG1812G0300001037.01.P01	417	8.01	46316.9	-0.183	Plasma_Membrane
	Tu6A_ATG18c	TuG1812G0600003786.01.P02	373	8.5	41101.6	-0.163	Plasma_Membrane
	Aet1D_ATG18a	AET1Gv20616800.1	1019	5.85	109894	-0.325	Nuclear
	Aet3D_ATG18b	AET3Gv21003800.5	443	6.51	48204.54	-0.35	Cytoplasmic Nuclear
	Aet3D_ATG18c	AET3Gv20205500.1	418	8.27	46337.99	-0.193	Plasma_Membrane
	Aet6D_ATG18d	AET6Gv20872500.2	414	8.11	45351.3	-0.224	Plasma_Membrane
ATG22	Ta3A_ATG22a	TraesCS3A02G169200.1	500	9.51	55112.7	0.417	Plasma_Membrane
	Ta3B_ATG22b	TraesCS3B02G197100.1	367	9.23	40127	0.392	Plasma_Membrane
	Ta3B_ATG22c	TraesCS3B02G197300.1	500	9.48	55111.7	0.42	Plasma_Membrane
	Ta3D_ATG22d	TraesCS3D02G172300.1	480	9.41	52673.8	0.381	Plasma_Membrane
	Ta3D_ATG22e	TraesCS3D02G172600.1	500	9.57	55134.6	0.419	Plasma_Membrane
	Td3A_ATG22a	TRIDC3AG023180.7	504	9.51	55370	0.421	Plasma_Membrane
	Td3B_ATG22b	TRIDC3BG026920.12	503	9.51	55327.9	0.427	Plasma_Membrane
	Tu3A_ATG22a	TuG1812G0300001924.01.P01	588	9.93	64775.8	0.309	Plasma_Membrane
	Aet3D_ATG22a	AET3Gv20384100.10	517	9.46	57002.8	0.422	Plasma_Membrane
ATG27	Ta4A_ATG27a	TraesCS4A02G113700.1	281	7.92	30420.9	0.131	Extracellular Plasma_Membrane
	Ta4B_ATG27b	TraesCS4B02G190400.1	280	7.49	30312.8	0.101	Extracellular
	Ta4D_ATG27c	TraesCS4D02G191800.1	279	7.49	30192.5	0.086	Extracellular
	Td4A_ATG27a	TRIDC4AG015690.2	229	8.15	25223.8	0.035	Extracellular
	Td4B_ATG27b	TRIDC4BG033170.2	228	7.96	25048.6	0.005	Extracellular
	Tu4A_ATG27a	TuG1812G0400002289.01.P02	280	7.92	30359.8	0.123	Extracellular Plasma_Membrane
	Aet4D_ATG27a	AET4Gv20499100.8	329	6.12	35684.1	0.258	Plasma_Membrane
ATG101	Ta2A_ATG101a	TraesCS2A02G518700.1	215	6.25	24221.5	-0.436	Cytoplasmic Nuclear
	Ta2D_ATG101b	TraesCS2D02G520100.1	215	6.14	24828.2	-0.455	Cytoplasmic Nuclear
	Td2A_ATG101a	TRIDC2AG072790.2	247	9.12	28685.9	-0.557	Nuclear
	Td2B_ATG101b	TRIDC2BG079000.1	204	6.49	23539.7	-0.463	Cytoplasmic Nuclear
	Tu2A_ATG101a	TuG1812G0200005636.01.P01	215	6.14	24888.3	-0.439	Cytoplasmic Nuclear
	Aet2D_ATG101a	AET2Gv21143300.3	245	9.11	28517.6	-0.602	Nuclear
