# Supplementary material for: The Landscape of Autophagy-Related (ATG) Genes and Functional Characterization of TaVAMP727 to Autophagy in Wheat
Source: Int J Mol Sci. 2022 Jan 14;23(2):891. doi: 10.3390/ijms23020891 (PMC8776105; doi:10.3390/ijms23020891)
Supplement: Supplementary file 1 [file ijms-23-00891-s001.zip › Table S2.xlsx]

## Sheet: Additional file 1
Additional file 1. Annotation and classifaction of indentifed cis-element
	Cis-element	Discription	Class
Phytohormone	SPHCOREZMC1	Core of Sph element; Core motif of Sph element in maize (Z.m.) C1 gene to which maize VP1 (viviparous 1) protein binds; VP1-responsive element; see RYREPEAT4 (S000010); VP1 gene is specifically required for expression of the maturation program in seed development; VP1 is a novel transcription factor possibly involved in potentiation of a seed-specific hormone response;	seed-specific hormone response
	ABREATCONSENSUS	ABA-responsive elements (ABREs) found in the promoter of ABA and/or stress-regulated genes; ABFs, a family of ABRE binding factors; ABF3 and ABF4 function in ABA signaling;	ABA
	ABREATRD22	ABRE (ABA responsive element) in Arabidopsis (A.t.) dehydration-responsive gene rd22;	ABA
	ABREAZMRAB28	ABA-responsive element (ABRE B) found at -105 to -96 in maize (Z.m.) rab28 (Busk & Pages, 1997); Maize rab28 is ABA-inducible in embryos and vegetative tissues;	ABA
	ABRECE1HVA22	CE1(coupling element 1) of barley HVA22 gene; possible binding site for nuclear bZIP protein; ABA responsive complex consists of a G-box, namely ABRE3 (GCCACGTACA), and CE1;	ABA
	ABRELATERD1	ABRE-like sequence (from -199 to -195) required for etiolation-induced expression of erd1 (early responsive to dehydration) in Arabidopsis;	ABA
	ABREMOTIFAOSOSEM	motif A ABRE-like sequence found in rice (O.s.) Osem gene promoter; Essential for activation by VP1; Important for regulation by ABA; See S000102, S000300; TRAB1, bZIP transcription factor, interacts with VP1 and mediates abscisic acid-induced transcritption;	ABA
	ABREOSRAB21	ABA responsive element (ABRE) of wheat Em and rice (O.s.) rab21 genes; Proposed consensus sequence for the repeated motif (Em1a and Em1b) of wheat Em gene;	ABA
	ABRERATCAL	ABRE-related sequence or "Repeated sequence motifs" identified in the upstream regions of 162 Ca(2+)-responsive upregulated genes; see also ABRE;	ABA
	ABREZMRAB28	ABA-responsive element (ABRE A) found at -148 to -139 in maize rab28 (Busk & Pages, 1997); Maize rab28 is ABA-inducible in embryos and vegetative tissues;	ABA
	ACGTABREMOTIFA2OSEM	Experimentally determined sequence requirement of ACGT-core of motif A in ABRE of the rice gene, OSEM; See S000281; DRE and ABRE are interdependent in the ABA-responsive expression of the rd29A in Arabidopsis;	ABA
	ACGTABREMOTIFAOSOSEM	ABRE motif A found in the promoter of the rice (O.s.) Osem gene; ACGT-containing ABRE; Required for ABA-responsiveness and VP1 activation; Binding site of TRAB1; Motif A and CE3 (S000282) are functionally equivalent; TRAB1, bZIP transcription factor, interacts with VP1 and mediates abscisic acid-induced transcritption;	ABA
	DPBFCOREDCDC3	A novel class of bZIP transcription factors, DPBF-1 and 2 (Dc3 promoter-binding factor-1 and 2) binding core sequence; Found in the carrot (D.c.) Dc3 gene promoter; Dc3 expression is normally embryo-specific, and also can be induced by ABA; The Arabidopsis abscisic acid response gene ABI5 encodes a bZIP transcription factor; abi5 mutant have a pleiotropic defects in ABA response; ABI5 regulates a…	ABA
	DRE2COREZMRAB17	DRE2 core found in maize (Z.M.) rab17 gene promoter; "DBF1" and "DBF2" bound to "DRE2"; rab17 is expressed during late embryogenesis, and is induced by ABA; See S000150, S000200 and S000401;	ABA
	EMBP1TAEM	Binding site of trans-acting factor EMBP-1; wheat (T.a.) Em gene; See S000015; Binding site of ABFs; ABFs (ABRE binding factors) were isolated from Arabidopsis by a yeast one-hybrid screening system; Expression ABFs is induced by ABA and various stress treatment; ABFs belongs to a distinct subfamily of bZIP proteins; Involved in ABA-mediated stress-signaling pathway;	ABA
	PROXBBNNAPA	prox B (proximal portion of B-box) found in napA gene of Brassica napus (B.n.); CA-rich sequence; Found between -130 and -124; Required for seed specific expression and ABA responsiveness; See S000262, S000264; dist B ABRE mediated transactivation by ABI3 adn ABI3-dependent response to ABA; a tetramer of the composite RY/G complex mediated only ABA-independent transactivation by ABI3; B2 domain o…	ABA
	RYREPEATBNNAPA	RY repeat found in RY/G box (the complex containing the two RY repeats and the G-box) of napA gene in Brassica napus (B.n.); Found between -78 and -50; Required for seed specific expression; See S000262, S000263; dist B ABRE mediated transactivation by ABI3 adn ABI3-dependent response to ABA; a tetramer of the composite RY/G complex mediated only ABA-independent transactivation by ABI3; B2 domain…	ABA
	SBOXATRBCS	S-box conserved in several rbcS promoters in Arabidopsis; ABI4 binding site; "Important for the sugar and ABA responsiveness of CMA5"(Acevedo-Hernandez et al., 2005);	ABA
	LTRECOREATCOR15	Core of low temperature responsive element (LTRE) of cor15a gene in Arabidopsis (A.t.); A portion of repeat-C (C-repeat), TGGCCGAC, which is repeated twice in cor15a promoter (Baker et al., 1994); ABA responsiveness; Involved in cold induction of BN115 gene from winter Brassica napus; LTRE; See S000157, S000152; Light signaling mediated by phytochrome is necessary for cold- or drought- induced ge…	ABA
	RYREPEATVFLEB4	RY repeat motif; quantitative seed expression; Gene: Vicia faba LeB4; Soybean glycinin (Gy2); other dicot and monocot seed protein genes; "Sph box" found in rice (O.s.) Osem gene promoter; See S000010, S000299, S000300; Binding site of Arabidopsis B3-domain-containing transcription factor FUS3; TRAB1, bZIP transcription factor, interacts with VP1 and mediates abscisic acid-induced transcritption;…	ABA
	SURECOREATSULTR11	Core of sulfur-responsive element (SURE) found in the promoter of SULTR1;1 high-affinity sulfate transporter gene in Arabidopsis; SURE contains auxin response factor (ARF) binding sequence (GAGACA)(see S000270 ARF:TGTCTC; its complementary seq is GAGACA), and this core sequence is a part of it; this core seq is involved in -S response; Beware of other SURE (sucrose responsive element) !!;	IAA
	ARFAT	ARF (auxin response factor) binding site found in the promoters of primary/early auxin response genes of Arabidopsis thaliana (A.t.); AuxRE; See S000337; Binding site of Arabidopsis ARF1 (Auxin response factor1); Sequence found in NDE element in Soybean (G.m.) SAUR (Small Auxin-Up RNA) 15A gene promoter; See S000359, S000360; Found in D1 or D4 element in Soybean (G.m.) GH3 promoter; This element …	IAA
	AUXREPSIAA4	AuxRE (Auxine responsive element ) of pea (P.s.) PS-IAA4/5 gene; Indoleacetic acid-inducible genes; domain A; TGA1a is preferentially expressed in root tip meristems; TGA1a may contribute to the expression of GST isoenzymes, especially in root tip meristems;	IAA
	AUXRETGA1GMGH3	TGA-box #1 in putative auxin-resonsive element (AUXRE) of soybean (G.m.) GH3 promoter; Strong binding site for proteins in plant nuclear extracts;	IAA
	AUXRETGA2GMGH3	TGA-box #2 in putative auxin-resonsive element (AUXRE) E1 of soybean (G.m.) GH3 promoter; Strong binding site for proteins in plant nuclear extracts; Hex-like element; E1 element=-249 to -203; E2 element=-241 to -224; Called G-box by Liu et al. (1997);	IAA
	CACGCAATGMGH3	Sequence found in D4 element in Soybean (G.m.) GH3 gene promoter; Showed constitutive activity with TGTCTC element (See S000270); Confers auxin inducibility; Binding site of nuclear protein; See also S000369;	IAA
	CATATGGMSAUR	Sequence found in NDE element in soybean (G.m.) SAUR (Small Auxin-Up RNA) 15A gene promoter; Involved in auxin responsiveness; See S000359, S000360;	IAA
	D1GMAUX28	D1; DNase I protected sequence found in the soybean (G.m.) auxin responsive gene, Aux28, promoter; D1 and D4 share a very similar core sequence TAGTXXCTGT and TAGTXCTGT, respectively; D1/D4-like sequence were identified in several other auxin-responsive genes; Binding site of GmGT-2 which is the GT-2 family of transcription factors; GmGT-2 are down-regulated by light in a phytochrome-dependent ma…	IAA
	GGTCCCATGMSAUR	Sequence found in NDE element in Soybean (G.m.) SAUR (Small Auxin-Up RNA) 15A gene promoter; Involved in auxin responsiveness; See S000270, S000359;	IAA
	NTBBF1ARROLB	NtBBF1(Dof protein from tobacco) binding site in Agrobacterium rhizogenes (A.r.) rolB gene; Found in regulatory domain B (-341 to -306); Required for tissue-specific expression and auxin induction;	IAA
	SEBFCONSSTPR10A	Binding site of the potato silencing element binding factor (SEBF) gene found in promoter of pathogenesis-related gene (PR-10a); Located between -45 and -39; Similar to the auxin response element;	IAA
	SITEIOSPCNA	Site IIa of rice (O.s.) PCNA (proliferating cell nuclear antigen) gene; Found at -197 to -188; Binding site for two nuclear proteins, PCF1 and PCF2 (Kosugi and Ohashi, 1997); Suggested to be involved in meristematic tissue-specific expression; Resemble the conserved motif (T/GGTCCCAT) found in promoter regions of auxin-regulated genes; See S000026 (AUXREPSIAA4);	IAA
	ASF1MOTIFCAMV	ASF-1 binding site in CaMV 35S promoter; ASF-1 binds to two TGACG motifs; See S000023 (AS1); Found in HBP-1 binding site of wheat histone H3 gene; TGACG motifs are found in many promoters and are involved in transcriptional activation of several genes by auxin and/or salicylic acid; May be relevant to light regulation; Binding site of tobacco TGA1a; TGA1a and b show homology to CREB; TGA6 is a ne…	IAA
	ERELEE4	ERE (ethylene responsive element) of tomato (L.e.) E4 and carnation GST1 genes; GST1 is related to senescence; Found in the 5'-LTR region of TLC1.1 retrotransposon family in Lycopersicon chilense (Tapia et al.); ERE motifs mediate ethylene-induced activation of the U3 promoter region;	ETH
	GCCCORE	Core of GCC-box found in many pathogen-responsive genes such as PDF1.2, Thi2.1, and PR4; Has been shown to function as ethylene-responsive element; See S000036, S000232, S000332; Appears to play important roles in regulating jasmonate-responsive gene expression; Tomato Pti4 (ERF) regulates defence-related gene expression via GCC box and non-GCC box cis elements (Myb1 (GTTAGTT) and G-box(CACGTG));	ETH
	GADOWNAT	Sequence present in 24 genes in the GA-down regulated d1 cluster (106 genes) found in Arabidopsis seed germination; This motif is similar to ABRE (Busk and Pages 1998);	GA
	GARE1OSREP1	Gibberellin-responsive element (GARE) found in the promoter region of a cystein proteinase (REP-1) gene in rice; See S000020;	GA
	GARE2OSREP1	Gibberellin-responsive element (GARE) found in the promoter region of a cystein proteinase (REP-1) gene in rice; See S000020;	GA
	GAREAT	GARE (GA-responsive element); Occurrence of GARE in GA-inducible, GA-responsible, and GA-nonresponsive genes found in Arabidopsis seed germination was 20, 18, and 12%, respectively; see S000181;	GA
	MYBGAHV	Central element of gibberellin (GA) response complex (GARC) in high-pI alpha-amylase gene in barley (H.v.); Similar to c-myb and v-myb consensus binding site; GAmyb binds specifically to the TAACAAA box in vitro; GAmyb is the sole GA-regulated transcriptional factor required for transcriptional activation of the high-pI alpha-amylase; GARC consist of the pyrimidine, TAACAAA and TATCCAC boxes; GAR…	GA
	OPAQUE2ZMB32	opaque-2 binding site of maize (Z.m.) b-32 (type I ribosome-inactivating protein gene; O2; O2S; O2S and GARE form a gibberellin response complex (GARC)(Rogers and Rogers, 1992);	GA
	PYRIMIDINEBOXHVEPB1	Pyrimidine box found in the barley (H.v.) EPB-1 (cysteine proteinase) gene promoter; Located between -120 to -113; Required for GA induction; See S000297, S000259;	GA
	PYRIMIDINEBOXOSRAMY1A	Pyrimidine box found in rice (O.s.) alpha-amylase (RAmy1A) gene; Gibberellin-respons cis-element of GARE and pyrimidine box are partially involved in sugar repression; Found in the promoter of barley alpha-amylase (Amy2/32b) gene which is induced in the aleurone layers in response to GA; BPBF protein binds specifically to this site; See S000265;	GA
	TATCCACHVAL21	TATCCAC box is a part of the conserved cis-acting response complex (GARC) that most often contain three sequence motifs, the TAACAAA box (see S000181), or GA-responsive element (GARE); the pyrimidine box, CCTTTT (see S000259); and the TATCCAC box, which are necessary for a full GA response;	GA
	WRKY71OS	A core of TGAC-containing W-box of, e.g., Amy32b promoter; Binding site of rice WRKY71, a transcriptional repressor of the gibberellin signaling pathway; Parsley WRKY proteins bind specifically to TGAC-containing W box elements within the Pathogenesis-Related Class10 (PR-10) genes (Eulgem et al., 1999); See S000390 (TTGAC), S000442 (TGACT);	GA
	CPBCSPOR	The sequence critical for Cytokinin-enhanced Protein Binding in vitro, found in -490 to -340 of the promoter of the cucumber (CS) POR (NADPH-protochlorophyllide reductase) gene;	IAA
	T/GBOXATPIN2	T/G-box found in tomato proteinase inhibitor II (pin2) and leucine aminopeptidase (LAP) genes; Involved in jasmonate (JA) induction of these genes; bHLH-Leu zipper JAMYC2 and JAMYC10 proteins specifically recognaize this motif (Boter et al., 2004);	JA
	TCA1MOTIF	TCA-1 (tobacco nuclear protein 1) binding site; Related to salicylic acid-inducible expression of many genes; Found in barley beta-1,3-glucanase and over 30 different plant genes which are known to be induced by one or more forms of stress; A similar sequence (TCATTTCTT) was found in tobacco Tnt1 retrotransposon promoter (Mhiri et al., 1997);	SA
	WBOXATNPR1	W-box found in promoter of Arabidopsis thaliana (A.t.) NPR1 gene; Located between +70 and +79 in tandem; They were recognized specifically by salicylic acid (SA)-induced WRKY DNA binding proteins; See S000142 (SQ=TTGACC); See S000310 (SQ=TTTGACY); A cluster of WRKY binding sites act as negative regulatory elements for the inducible expression of AtWRKY18 (Chena and Chen, 2002); See also S000142;	SA
	HEXAT	Hex motif; Binding site of Arabidopsis (A.t.) bZIP protein TGA1 and G box binding factor GBF1; TGA1 and members of the GBF family differ in their DNA binding properties; G-Box-like element;	-
stresses response	LTRECOREATCOR15	Core of low temperature responsive element (LTRE) of cor15a gene in Arabidopsis (A.t.); A portion of repeat-C (C-repeat), TGGCCGAC, which is repeated twice in cor15a promoter (Baker et al., 1994); ABA responsiveness; Involved in cold induction of BN115 gene from winter Brassica napus; LTRE; See S000157, S000152; Light signaling mediated by phytochrome is necessary for cold- or drought- induced ge…	cold
	MYB1LEPR	Tomato Pti4(ERF) regulates defence-related gene expression via GCC box and non-GCC box cis elements (Myb1(GTTAGTT), G box (CACGTG));	defence
	MYB1AT	MYB recognition site found in the promoters of the dehydration-responsive gene rd22 and many other genes in Arabidopsis;	dehydration
	MYB2AT	Binding site for ATMYB2, an Arabidopsis MYB homolog; ATMYB2 binds oligonucleotides that contained a consensus MYB recognition sequence (TAACTG), such as is in the SV40 enhancer and the maize bronze-1 promoter (Urao et al., Plant Cell 5:1529 (1993)); ATMYB2 is involved in regulation of genes that are responsive to water stress in Arabidopsis; See S000355;	water stress
	MYB2CONSENSUSAT	MYB recognition site found in the promoters of the dehydration-responsive gene rd22 and many other genes in Arabidopsis; See S000177 (MYB2), S000175 (MYBATRD22);	dehydration
	MYBATRD22	Binding site for MYB (ATMYB2) in dehydration-responsive gene, rd22; MYB binding site in rd22 gene of Arabidopsis thaliana; ABA-induction; Located at ca. -141 of rd22 gene; Also MYC at ca. -200 of rd22 gene; See S000174 (MYCATRD22); See S000355;	dehydration
	MYBCORE	Binding site for all animal MYB and at least two plant MYB proteins ATMYB1 and ATMYB2, both isolated from Arabidopsis; ATMYB2 is involved in regulation of genes that are responsive to water stress in Arabidopsis; A petunia MYB protein (MYB.Ph3) is involved in regulation of flavonoid biosynthesis (Solano et al. EMBO J 14:1773 (1995)); See S000355;	water stress
	MYCATERD1	MYC recognition sequence (from -466 to -461) necessary for expression of erd1 (early responsive to dehydration) in dehydrated Arabidopsis; NAC protein bound specifically to the CATGTG motif (Tran et al., 2004)); NAC protein bound specifically to the CATGTG motif (Tran et al., 2004);	dehydration
	MYCATRD22	Binding site for MYC (rd22BP1) in Arabidopsis (A.t.) dehydration-resposive gene, rd22; MYC binding site in rd22 gene of Arabidopsis thaliana; ABA-induction; Located at ca. -200 of rd22 gene; Also MYB at ca. -141 of rd22 gene; See also S000175 (MYBATRD22);	dehydration
	MYCCONSENSUSAT	MYC recognition site found in the promoters of the dehydration-responsive gene rd22 and many other genes in Arabidopsis; Binding site of ATMYC2 (previously known as rd22BP1); see S000144 (E-box; CANNTG), S000174 (MYCATRD22); N=A/T/G/C; MYC recognition sequence in CBF3 promoter; Binding site of ICE1 (inducer of CBF expression 1) that regulates the transcription of CBF/DREB1 genes in the cold in Ar…	dehydration
	ELRECOREPCRP1	ElRE (Elicitor Responsive Element) core of parsley (P.c.) PR1 genes; consensus sequence of elements W1 and W2 of parsley PR1-1 and PR1-2 promoters; Box W1 and W2 are the binding site of WRKY1 and WRKY2, respectively; ERE; "WA box"; One of the W boxes found in the Parsley (P.c.) WRKY1 gene promoter; Required for elicitor responsiveness; See S000310; "WC box" WB box (S000310) and WC box constitute …	-
	LTRE1HVBLT49	LTRE-1 (low-temperature-responsive element) in barley (H.v.) blt4.9 gene promoter; A new LTRE; A previously known LTRE is CCGAC;	cold
	LTREATLTI78	Putative low temperature responsive element (LTRE); Found in Arabidopsis thaliana (A.t.) low-temperature-induced (lti) genes, lti78 and lti65; Repeated four times in lti78 which is also known as cor78 and rd29A (see S000152)(Baker et al., Plant Mol Biol 24:701(1994)); Found also in barley low temperature responsive genes, blt4.2, blt4.6, blt4.9 (lipid transfer genes); cold inducible; See LTRECORE…	cold
	CACGTGMOTIF	CACGTG motif; "G-box"; Binding site of Arabidopsis GBF4; C. roseus G-box binding factor 1 (CrGBF1) and 1 (CrGBF2) can act as transcriptional repressors of the Str promoter via direct interaction with the G-box; See S000345; Essential for expression of beta-phaseolin gene during embryogenesis in bean, tobacco, Arabidopsis; Tomato Pti4 (ERF) regulates defense-related gene expression via GCC box and…	defence
	WBOXNTCHN48	W box identified in the region between -125 and -69 of a tobacco class I basic chitinase gene CHN48; NtWRKY1, NtWRKY2 and NtWRKY4 bound to W box; NtWRKYs possibly involved in elicitor-respsonsive transcription of defense genes in tobacco; Y=C/T; see also S000442 (TGACT) and S000447 (TGAC);	defence
	HBOXCONSENSUSPVCHS	H-box; Consensus sequence of H-boxes found in bean (Phaseolus vulgaris) chs15 gene promoter; Essential for both light regulation and elicitor induction; Similar sequence was found in tobacco Tnt1 retrotransposon promoter (LTR); Tnt1 is induced by wounding and by abiotic stress; "KAP-2" binds to the H-box and stimulates transcription from a promoter harboring the H-box; "KAP-2" shares sequence sim…	wounding and by abiotic stress
	CPRFPCCHS	"BoxII"; Binding site of CPRF-1, -2, -3 and -4(Common Plant Regulatory Factor) in the parsley (P.c.) light responsive chalcone synthase (CHS) gene promoter; CPRF proteins are bZIP class transcription factors; CPRF proteins participates in the light-mediated activation of the CHS gene in parsley; "ACE"; The proline-rich domains of CPRF1 and 4 activate transcription; CPRF1-containing bZIP heterodim…	drought
	ARE1	ARE (antioxidant response element); antioxidant response element of rat glutathione S-transferase Ya subunit, and rat NAD(P)H:quinone reductase genes;	antioxidant response
	PREATPRODH	PRE (Pro- or hypoosmolarity-responsive element) found in the promoter region of proline dehydrogenase (ProDH) gene in Arabidopsis; Core of 9-bp sequence ACTCATCCT which is necessary for the efficient expression of ProDH in response to L-Pro and hypoosmolarity (Satoh et al., 2002); ATB2-binding site; Similar to GCN4 motif (ATGA(C/G)TCAT); ATB2 subgroup of bZIP transcription factors function as tra…	drought
	P1BS	PHR1-binding sequence found in the upstream regions of phosphate starvation responsive genes from several plant species; phr1 (phosphate starvation response 1) gene codes for PHR1 protein related to PSR1 gene in C. reinhardtii;	phosphate starvation response
	CCAATBOX1	Common sequence found in the 5'-non-coding regions of eukaryotic genes; "CCAAT box" found in the promoter of heat shock protein genes; Located immediately upstream from the most distal HSE of the promoter; "CCAAT box" act cooperatively with HSEs to increase the hs promoter activity;	heat
	OSE1ROOTNODULE	One of the consensus sequence motifs of organ-specific elements (OSE) characteristic of the promoters activated in infected cells of root nodules; See also S000468;	biotic stress
	OSE2ROOTNODULE	One of the consensus sequence motifs of organ-specific elements (OSE) characteristic of the promoters activated in infected cells of root nodules; See also S000467;	biotic stress
	RGATAOS	R-GATA (GATA motif binding factor) binding site; GATA motif is found at -143 to -135 of RTBV promoter; GATA motif is required for phloem-specific gene expression of Rice Tungro Bacilliform Virus (RTBV); See also RNFG1OS (S000188), RNFG2OS (S000189), and ABFOS (S000190);	biotic stress
	SREATMSD	sugar-repressive element (SRE) found in 272 of the 1592 down-regulated genes after main stem decapitation in Arabidopsis; See also S000471, S000472;	wound
	UP1ATMSD	Up1 motif found in 162 of the 1184 up-regulated genes after main stem decapitation in Arabidopsis; See also S000470, S000472;	wound
	UP2ATMSD	Up2 motif found in 193 of the 1184 up-regulated genes after main stem decapitation in Arabidopsis; See also S000470, S000471;	wound
	IRO2OS	OsIRO2-binding core sequence; "G-box plus G"; Transcription factor OsIRO2 is induced exclusively by Fe deficiency;	Fe deficiency
	CURECORECR	GTAC is the core of a CuRE (copper-response element) found in Cyc6 and Cpx1 genes in Chlamydomonas; Also involved in oxygen-response of these genes; For CuRE, see Quin and Merchant, 1995;	copper-response element
	ACGTATERD1	ACGT sequence (from -155 to -152) required for etiolation-induced expression of erd1 (early responsive to dehydration) in Arabidopsis;	dehydration
	CBFHV	Binding site of barley (H.v.) CBF1, and also of barley CBF2; CBF = C-repeat (CRT) binding factors; CBFs are also known as dehydration-responsive element (DRE) binding proteins (DREBs); See also S000411 (SQ=GTCGAC);	dehydration
	DRECRTCOREAT	Core motif of DRE/CRT (dehydration-responsive element/C-repeat) cis-acting element found in many genes in Arabidopsis and in rice; R=G/A; Os DREB1A bound to GCCGAC more preferentially than to ACCGAC whereas At DREB1A bound to both GCCGAC and ACCGAC efficiently; See S000402 (ACCGAC); Maize ZmDREB1A bound to DRE (Qin et al. 2004); HaDREB2 in Helianthus annuus (sunflower)(Diaz-Martin et al. 2005); H…	dehydration
	GT1GMSCAM4	GT-1 motif found in the promoter of soybean (Glycine max) CaM isoform, SCaM-4; Plays a role in pathogen- and salt-induced SCaM-4 gene expression; See also S000198 (GT-1 consensus);	salt
	WRECSAA01	Wound-responsive element (WRE) found in the promoter region of cucumber (C.s.) ascorbate oxidase gene, CsAAO1; Binding site of proteins in tobacco nuclear extracts;	antioxidant response
	AGCBOXNPGLB	AGC box repeated twice in a 61 bp enhancer element in tobacco (N.p.) class I beta-1,3-glucanase (GLB) gene; See S000036, S000089; "GCC-box"; Binding sequence of Arabidopsis AtERFs; AtERF1,2 and 5 functioned as activators of GCC box-dependent transcription; AtERF3 and 4 acted as repressors; AtERF proteins are stress signal-response factors; EREBP2 binding site; Conserved in most PR-protein genes; …	stress signal-response
	AGMOTIFNTMYB2	AG-motif found at -114 of the promoter of NtMyb2 gene; NtMyb2 is a regulator of the tobacco retrotransposon Tto1 and the defence-related gene phenylalanine ammonia lyase (PAL), which are induced by various stress such as wounding or elicitor treatment; AGP1 (GATA-type zinc finger protein) binding site;	defence
	E2FBNTRNR	E2Fb found in the tobacco (N.t.) RNR (Ribonucleotide reductase) gene promoter; Binding site of tobacco E2F; Involved in upregulation of the promoter at G1/S transition; See S000366; "dE2F (distal reverse E2F element)" important for regulating specific RNR1a gene expression in respsonse to UV-C irradiation; See S000455;	UV-C irradiation
growth and development	DPBFCOREDCDC3	A novel class of bZIP transcription factors, DPBF-1 and 2 (Dc3 promoter-binding factor-1 and 2) binding core sequence; Found in the carrot (D.c.) Dc3 gene promoter; Dc3 expression is normally embryo-specific, and also can be induced by ABA; The Arabidopsis abscisic acid response gene ABI5 encodes a bZIP transcription factor; abi5 mutant have a pleiotropic defects in ABA response; ABI5 regulates a…	embryo
	RAV1AAT	Binding consensus sequence of Arabidopsis (A.t.) transcription factor, RAV1; RAV1 specifically binds to DNA with bipartite sequence motifs of RAV1-A (CAACA) and RAV1-B (CACCTG); RAV1 protein contain AP2-like and B3-like domains; The AP2-like and B3-like domains recognize the CAACA and CACCTG motifs, respectively; The expression level of RAV1 were relatively high in rosette leaves and roots; See S…	rosette leaves and roots
	RAV1BAT	Binding consensus sequence of an Arabidopsis (A.t.) transcription factor, RAV1; RAV1 specifically binds to DNA with bipartite sequence motifs of RAV1-A (CAACA) and RAV1-B (CACCTG); RAV1 protein contain AP2-like and B3-like domains; The AP2-like and B3-like domains recognize the CAACA and CACCTG motifs, respectively; The expression level of RAV1 were relatively high in rosette leaves and roots; Se…	rosette leaves and roots
	GBOX10NT	One of 11 G-box sequences in tobacco (N.t.); Required for high-level constitutive expression in seed, leaf, root, axillary bud, almost all parts of flower buds and pollen;	seed, leaf, root, axillary bud, almost all parts of flower buds and pollen
	PALINDROMICCBOXGM	Palindromic C-box in soybean (G.m.); bZIP factors, STGA1 and STFs (STF1 and STF2) found in soybean apical hypocotyl, bind to this sequence;	apical hypocotyl
	PE2FNTRNR1A	pE2F (proximal E2F elemen) at -143bp of tobacco (N.t.) RNR1a promoter; E2F factors involved in gene induction at the G1/S transition of the cell cycle; Important for regulating specific RNR1a (ribonucleotide reductase large subunit) gene expression in response to UV-C irradiation; See S000367;	cell cycle
	CELLCYCLESC	cell cycle box found in URS2 (-940/-200) of HO gene of S.cerevisiae; cell-cycle-specific activation of transcription;	cell cycle
	E2FAT	E2F-binding site found in many potential E2F target genes; most potential E2F targets identified in silico show a cell cycle-regulated expression; see S000366;	cell cycle
	CDA1ATCAB2	CDA-1 (CAB2 DET1-associated factor 1) binding site in DtRE (dark response element) f of chlorophyll a/b-binding protein2 (CAB2) gene in Arabidopsis;	Chlorophyll
	GAGAGMGSA1	GAGA element found in the promoter of the heme and chlorophyll synthesis gene Gsa1 in soybean (G.m.); GAGA binding protein (GBP) binds to (GA)n/(CT)n DNA;	Chlorophyll
	GATABOX	GATA box; GATA motif in CaMV 35S promoter; Binding with ASF-2; Three GATA box repeats were found in the promoter of Petunia (P.h.) chlorophyll a/b binding protein, Cab22 gene; Required for high level, light regulated, and tissue specific expression; Conserved in the promoter of all LHCII type I Cab genes;	Chlorophyll
	-10PEHVPSBD	-10 promoter element found in the barley (H.v.) chloroplast psbD gene promoter; Involved in the expression of the plastid gene psbD which encodes a photosystem II reaction center chlorophyll-binding protein that is activated by blue, white or UV-A light;	Chlorophyll
	CIACADIANLELHC	Region necessary for circadian expression of tomato (L.e.) Lhc gene;	circadian
	EVENINGAT	Evening element found 46 times in the promoters of 31 cycling genes in Arabidopsis thaliana (Harmer et al. 2000); Required for circadian control of gene expression; "EE (evening element) motif"; Also found in the promoter of the Solanum melongena gene encoding cysteine protease, and identified as cis-element for its circadian regulation (Rawat et al. 2005);	circadian
	SORLIP1AT	one of "Sequences Over-Represented in Light-Induced Promoters (SORLIPs) in Arabidopsis; Computationally identified phyA-induced motifs; SORLIP 1 is most over-represented, and most statistically singnificant; See also S000483, S000484, S000485, S000486 (all SORLIPs), and also S000487, S000488, S000489, S000490 (all SORLREPs); Over-represented in light-induced cotyledon and root common genes and ro…	cotyledon and root
	SORLIP2AT	one of "Sequences Over-Represented in Light-Induced Promoters (SORLIPs) in Arabidopsis; Computationally identified phyA-induced motifs; See also S000482, S000484, S000485, S000486 (all SORLIPs), and also S000487, S000488, S000489, S000490 (all SORLREPs);	cotyledon and root
	SORLIP3AT	one of "Sequences Over-Represented in Light-Induced Promoters (SORLIPs) in Arabidopsis; Computationally identified phyA-induced motifs; See also S000482, S000483, S000485, S000486 (all SORLIPs), and also S000487, S000488, S000489, S000490 (all SORLREPs);	cotyledon and root
	SORLIP5AT	one of "Sequences Over-Represented in Light-Induced Promoters (SORLIPs) in Arabidopsis; Computationally identified phyA-induced motifs; See also S000482, S000483, S000484, S000485 (all SORLIPs), and also S000487, S000488, S000489, S000490 (all SORLREPs); Over-represented in both light-induced cotyledon-specific and root-specific genes (Jiao et al. 2005; see S000482);	cotyledon and root
	SORLREP2AT	one of "Sequences Over-Represented in Light-Repressed Promoters (SORLREPs) in Arabidopsis; Computationally identified phyA-repressed motifs; See also S000488, S000489, S000490 (all SORLREPs); and also S000482, S000483, S000484, S000485, S000486 (all SORLIPs);	cotyledon and root
	SORLREP3AT	one of "Sequences Over-Represented in Light-Repressed Promoters (SORLREPs) in Arabidopsis; Computationally identified phyA-repressed motifs; See also S000487, S000489, S000490 (all SORLREPs); and also S000482, S000483, S000484, S000485, S000486 (all SORLIPs);	cotyledon and root
	TGACGTVMAMY	TGACGT motif found in the Vigna mungo (V.m.) alpha-Amylase (Amy) gene promoter; Located between -128 and -123; Required for high level expression of alpha-Amylase in the cotyledons of the germinated seeds; See S000234;	cotyledons
	MSACRCYM	MSA (M-specific activator) motif in Catharanthus roseus (C.r.) B-type cyclin (CYM) promoter; Essential for M phase-specific expression; Found at -66 to -58;	cyclin
	MYBCOREATCYCB1	Myb core in the 18 bp sequence which is able to activate reporter gene without leading to M-phase-specific expression, found in the promoter of Arabidopsis thaliana cyclin B1:1 gene; the 18 bp sequence share homology with a sequence found in the N. sylvestris cyclin B1 promoter (Trehin et al., 1999; see S000283):	cyclin
	CACGTGMOTIF	CACGTG motif; "G-box"; Binding site of Arabidopsis GBF4; C. roseus G-box binding factor 1 (CrGBF1) and 1 (CrGBF2) can act as transcriptional repressors of the Str promoter via direct interaction with the G-box; See S000345; Essential for expression of beta-phaseolin gene during embryogenesis in bean, tobacco, Arabidopsis; Tomato Pti4 (ERF) regulates defense-related gene expression via GCC box and…	embryogenesis
	GCN4OSGLUB1	GCN4 motif found in GluB-1 gene in rice (O.s.); Required for endosperm-specific expression; See S000276; AACA and ACGT motifs was found sufficient to confer a detectable level of endosperm expression; See S000353, S000354; This motif is the recognition site for a basic leucine zipper transcription factor that belongs to the group of maize Opaque-2 (O2)-like proteins; Although all the RISBZ protei…	endosperm
	DOFCOREZM	Core site required for binding of Dof proteins in maize (Z.m.); Dof proteins are DNA binding proteins, with presumably only one zinc finger, and are unique to plants; Four cDNAs encoding Dof proteins, Dof1, Dof2, Dof3 and PBF, have been isolated from maize; PBF is an endosperm specific Dof protein that binds to prolamin box; Maize Dof1 enhances transcription from the promoters of both cytosolic o…	endosperm
	AACACOREOSGLUB1	Core of AACA motifs found in rice (O.s.) glutelin genes, involved in controlling the endosperm-specific expression; AACA is also closely associated with the GCN4 motif in all rice glutelin genes and together have been shown to confer endosperm-specific enhancement to the truncated -90 CaMV 35S promoter; See also S000045, S000181, S000276;	endosperm
	ACGTOSGLUB1	ACGT motif found in GluB-1 gene in rice (O.s.); Required for endosperm-specific expression; Conserved in the 5'-flanking region of glutelin genes; See S000276, S000277; See S000019;Combination of GCN4, AACA and ACGT motifs was found sufficient to confer a detectable level of endosperm expression; See S000353, S000354;	endosperm
	CANBNNAPA	Core of "(CA)n element" in storage protein genes in Brasica napus (B.n.); embryo- and endosperm-specific transcription of napin (storage protein) gene, napA; seed specificity; activator and repressor;	endosperm
	L1BOXATPDF1	L1 box found in promoter of Arabidopsis thaliana (A.t.) PROTODERMAL FACTOR1 (PDF1) gene; Located between -134 and -127; Involved in L1 layer-specific expression; L1-specific homeodomain protein ATML can bind to the "L1 box"; Y=C/T; A cotton fiber gene, RD22-like 1 (RDL1), contains a homeodomain binding L1 box and a MYB binding motif (Wang et al., 2004); HDZip IV; See also S000371;	fiber
	LEAFYATAG	Target sequence of LEAFY in the intron of AGAMOUS gene in Arabidopsis; See Lohmann et al. Cell 105:793-803 (2003);	flower
	AGATCONSENSUS	Binding consensus sequence for the product of the Arabidopsis (A.t.) floral homeotic gene AGAMOUS (AG); AG protein contains a region similar to the DNA binding domain of SRF and MCM1; The consensus sequence contains a CArG box; AG protein is a putative transcription factor for floral genes; H=A/T/C; W=A/T; See S000342; MADS domain and I region of AGAMOUS are sufficient and necessary for DNA bindi…	flower
	AGL2ATCONSENSUS	Binding consensus sequence of Arabidopsis (A.t.) AGL2 (AGAMOUS-like 2); AGL2 contains MADS domain; AGL2 binds DNA as a dimer; See S000338;	flower
	CARGATCONSENSUS	CArG consensus sequence found in the promoter of Arabidopsis (A.t.) SOC1 which is the MADS-box flowering-time gene; FLC is a component of the vernalization (low-temperature) pathway binds directly to this site and blocks transcriptional activation of SOC1 by CONSTANS (CO); See also S000342 (AGAMOUSATCONSENSUS);	flowering-time gene
	CACTFTPPCA1	Tetranucleotide (CACT) is a key component of Mem1 (mesophyll expression module 1) found in the cis-regulatory element in the distal region of the phosphoenolpyruvate carboxylase (ppcA1) of the C4 dicot F. trinervia;	mesophyll
	5659BOXLELAT5659	56/59 box; A sequence motif shared between the tomato (L.e.) LAT(Late Anther Tomato)56 and LAT59 promoters; Found in -103 to -94 in LAT56 and in -114 to -105 in LAT59; Involved in modulating the activity of the LAT gene promoters in pollen;	pollen
	GTGANTG10	GTGA motif found in the promoter of the tobacco (N.t.) late pollen gene g10 which shows homology to pectate lyase and is the putative homologue of the tomato gene lat56; Located between -96 and -93; See S000280;	pollen
	POLLEN1LELAT52	One of two co-dependent regulatory elements responsible for pollen specific activation of tomato (L.e.) lat52 gene; Found at -72 to -68 region; See S000246 (POLLEN2LELAT52); AGAAA and TCCACCATA (S000246) are required for pollen specific expression; Also found in the promoter of tomato endo-beta-mannanase gene (LeMAN5) gene (Filichkin et al. 2004);	pollen
	QELEMENTZMZM13	Q(quantitative)-element in maize (Z.m.) ZM13 gene promoter; Found at -107 to -102; Involved in expression enhancing activity; ZM13 is a maize homolog of tomato LAT52 gene; ZM13 is a pollen-specific maize gene;	pollen
	RHERPATEXPA7	Right part of RHEs (Root Hair-specific cis-Elements) conserved among the Arabidopsis thaliana A7 (AtEXPA7) orthologous (and paralogous) genes from diverse angiosperm species with different hair distribution patterns;	Root Hair
	CEREGLUBOX1PSLEGA	cereal glutenin box in pea legumin gene (legA); sequence homologous to the cereal glutenin gene control element ("-300 element");	seed
	CEREGLUBOX2PSLEGA	cereal glutenin box in pea legumin gene (legA); sequence homologous to the cereal glutenin gene control element ("-300 element");	seed
	RYREPEATVFLEB4	RY repeat motif; quantitative seed expression; Gene: Vicia faba LeB4; Soybean glycinin (Gy2); other dicot and monocot seed protein genes; "Sph box" found in rice (O.s.) Osem gene promoter; See S000010, S000299, S000300; Binding site of Arabidopsis B3-domain-containing transcription factor FUS3; TRAB1, bZIP transcription factor, interacts with VP1 and mediates abscisic acid-induced transcritption;…	seed
	SPHCOREZMC1	Core of Sph element; Core motif of Sph element in maize (Z.m.) C1 gene to which maize VP1 (viviparous 1) protein binds; VP1-responsive element; see RYREPEAT4 (S000010); VP1 gene is specifically required for expression of the maturation program in seed development; VP1 is a novel transcription factor possibly involved in potentiation of a seed-specific hormone response;	seed
	RYREPEATGMGY2	RY repeat motif (CATGCAT); Present in the 5' region of the soybean (G.m.) glycinin gene (Gy2);	seed
	RYREPEATLEGUMINBOX	RY repeat (CATGCAY) or legumin box found in seed-storage protein genes in legume such as soybean (G.m.);	seed
	CAATBOX1	"CAAT promoter consensus sequence" found in legA gene of pea;	seed storage protein
	WBBOXPCWRKY1	WB box; WRKY proteins bind specifically to the DNA sequence motif (T)(T)TGAC(C/T), which is known as the W box; Found in amylase gene in sweet potato, alpha-Amy2 genes in wheat, barley, and wild oat, PR1 gene in parsley, and a transcription factor gene in Arabidopsis; The motif was initially registered in PLACEdb as TTGACT, and was corrected to TTGACY on 22 June, 2006;	seed storage protein
	TATCCAOSAMY	TATCCA element found in alpha-amylase promoters of rice (O.s.) at positions ca.90 to 150bp upstream of the transcription start sites; Binding sites of OsMYBS1, OsMYBS2 and OsMYBS3 which mediate sugar and hormone regulation of alpha-amylase gene expression; See also S000021 (AMYBOX2); S000256 (TATCCAY motif);	seed storage protein
	-300CORE	TGTAAAG core motif in "-300 elements" of alpha-zein genes of maize; "-300 element core"; "prolamin box" by Vicente-Carbajosa et al. (Proc Natl Acad Sci USA 94:7685 (1997)); P-box; Binds with P-box binding factor (PBF); Binds with BPBF (Barley PBF); PBF is a DNA-binding protein of the DOF class of transcription factors;	seed storage protein
	-300ELEMENT	Present upstream of the promoter from the B-hordein gene of barley and the alpha-gliadin, gamma-gliadin, and low molecular weight glutenin genes of wheat; See S000001 -300CORE; See S000002 -300MOTIF;	seed storage protein
	-300MOTIFZMZEIN	Motif in -300 elements of alpha-zein genes of maize (Z.m.); homologous to the sequence to which transacting factors of AP-1, fos, jun or yeast hisS bind;	seed storage protein
	EMHVCHORD	Endosperm motif (EM) found in the promoter of barley (H.v.) c-hordein gene; Involved in the nitrogen response of c-hordein promoter;	seed storage protein
	GLMHVCHORD	GLM (GCN4-like motif) found in the promoter of barley (H.v.) B1- and c-hordein gene; Involved in the nitrogen response of c-hordein promoter; R=A/G; S=C/G; See also S000277 (GCN4OSGLUB1); SPA, a seed-specific basic leucine zipper protein from wheat, can activate transcription from the GCN4-like motif (GLM) of -326 LMWG-1D1 promoter (Albani et al., 1997);	seed storage protein
	EBOXBNNAPA	E-box of napA storage-protein gene of Brassica napus (B.n.); See S000042 (CACGTGMOTIF); see S000407 (Myc consensus: CANNTG); This sequence is also known as RRE (R response element)(Hartmann et al., 2005);	seed storage protein
	CARGCW8GAT	A variant of CArG motif (see S000404), with a longer A/T-rich core; Binding site for AGL15 (AGAMOUS-like 15);	somatic embryo development
	NRRBNEXTA	NRR (negative regulatory region) in promoter region of Brassica napus (B.n.) extA extensin gene; Removal of this region leads to expression in all tissues within the stem internode, petiole and root;	stem internode, petiole and root
	ACGTABOX	C-box according to the nomenclature of ACGT elements by Foster et al. (FASEB J 8:192-200 (1994)); One of ACGT elements; Factors groups 1, 2 and 3 have affinity for C-box (Izawa et al. J Mol Biol. 230:1131-1144 (1993)); RITA-1 binding site (Izawa et al. 1994);	tubulin
	XYLAT	cis-element identified among the promoters of the "core xylem gene set";	xylem

## Sheet: Additional file 2
Additional file 2. Annotations of putative TaATGs cis-acting regulatory DNA elements identified in PLACE
Cis-element	Ta4A_ATG1a	Ta4D_ATG1b	Ta6A_ATG2a	Ta6B_ATG2b	Ta7A_ATG2c	Ta7D_ATG2d	Ta1A_ATG3a	Ta1B_ATG3b	Ta1D_ATG3c	Ta2A_ATG4a	TaUn_ATG4b	Ta2D_ATG4c	Ta6A_ATG5a	Ta6A_ATG5b	Ta6B_ATG5c	Ta6B_ATG5d	TaU0_ATG5e	Ta3A_ATG6a	Ta3D_ATG6b	Ta2D_ATG7a	Ta3A_ATG7b	Ta3B_ATG7c	Ta3D_ATG7d	Ta2A_ATG8a	Ta2A_ATG8b	Ta2B_ATG8c	Ta2B_ATG8d	Ta2D_ATG8e	Ta5A-ATG8f	Ta5B_ATG8g	Ta5D_ATG8h	Ta6B_ATG8i	Ta4A_ATG9a	Ta4B_ATG9b	Ta4D_ATG9c	Ta2A_ATG10a	Ta2B_ATG10b	Ta6A_ATG11a	Ta6B_ATG11b	Ta6D_ATG11c	Ta6A_ATG12a	Ta6B_ATG12b	Ta6D_ATG12c	Ta7B_ATG12d	Ta2A_ATG13a	Ta2B_ATG13b	Ta2D_ATG13c	Ta4A_ATG13d	Ta4B_ATG13e
-10PEHVPSBD	-	-	-	-	-	2	-	-	1	-	-	-	-	-	-	-	-	-	-	1	1	-	2	-	-	-	-	-	-	-	-	-	-	1	1	1	-	-	-	1	-	-	7	-	1	1	1	2	1
-300CORE	1	1	-	-	-	-	-	-	1	-	-	-	-	-	-	1	-	-	-	-	-	-	-	-	-	-	-	-	-	-	-	-	-	-	-	1	-	-	-	-	-	-	-	-	-	-	-	-	-
-300ELEMENT	3	3	1	2	2	2	1	-	2	-	-	1	-	2	1	1	1	-	-	1	1	4	1	2	1	1	2	1	1	1	-	1	1	1	1	2	1	-	2	3	1	1	1	1	-	1	2	-	-
-300MOTIFZMZEIN	-	-	-	-	-	-	-	-	-	-	-	-	-	-	-	-	-	-	-	-	-	-	-	-	-	-	-	-	-	-	-	-	1	1	1	-	-	-	-	-	-	-	-	-	-	-	-	-	-
2SSEEDPROTBANAPA	1	2	-	-	-	-	1	-	-	1	-	-	-	-	-	-	-	-	-	-	-	-	-	1	1	-	1	-	-	-	-	-	1	2	2	1	1	-	-	-	-	-	1	1	-	1	1	2	1
5659BOXLELAT5659	-	-	-	-	-	-	-	-	-	-	-	-	-	-	-	-	-	-	-	-	-	-	-	-	-	-	-	-	-	-	-	-	-	-	-	-	-	-	-	-	-	-	-	-	-	-	-	-	-
AACACOREOSGLUB1	1	1	1	-	-	-	-	-	1	-	-	-	-	-	-	-	-	-	-	-	2	1	1	2	2	1	2	1	-	-	-	-	-	-	-	-	-	-	-	1	-	-	-	-	1	-	-	-	-
ABREATCONSENSUS	-	-	-	-	-	-	-	-	-	-	-	-	-	-	-	-	-	-	1	-	1	1	1	-	-	-	-	-	-	-	-	-	-	-	-	-	-	-	-	-	-	-	-	1	-	-	-	-	-
ABREATRD22	-	-	-	-	-	-	-	-	-	-	-	-	-	-	1	-	-	1	1	-	-	-	-	-	-	-	-	-	-	-	-	-	-	-	-	-	-	-	-	-	-	-	-	-	-	-	-	-	-
ABREAZMRAB28	-	-	-	-	-	-	-	-	-	-	-	-	-	-	-	-	-	-	-	-	-	-	-	-	-	-	-	-	-	-	-	-	-	-	-	-	-	-	-	-	-	-	-	-	-	-	-	-	-
ABRECE1HVA22	-	-	-	-	-	-	-	-	-	-	-	-	-	-	-	-	-	-	-	-	-	-	-	-	-	-	-	-	-	-	-	1	-	-	-	-	-	-	-	-	-	-	-	-	-	-	-	-	-
ABRELATERD1	4	2	1	-	8	1	3	3	-	3	2	2	2	3	5	5	3	5	7	1	2	3	3	-	3	2	3	4	1	-	-	-	4	2	4	3	1	6	2	3	-	4	1	3	2	2	2	1	1
ABREMOTIFAOSOSEM	-	-	-	-	-	-	-	1	-	-	-	-	-	-	-	-	-	-	-	-	-	-	-	-	-	-	-	-	-	-	-	-	-	-	-	-	-	-	-	-	-	-	-	-	-	-	-	-	-
ABREOSRAB21	-	-	-	-	-	1	-	-	-	-	-	-	-	1	-	-	-	-	-	1	1	-	-	-	-	2	-	-	-	-	-	-	-	-	-	1	-	-	-	-	-	-	-	1	-	-	-	-	-
ABRERATCAL	2	1	1	2	7	1	2	4	1	3	1	2	-	1	3	2	-	4	4	-	2	1	2	-	5	1	3	2	-	-	-	1	2	1	3	1	1	2	1	1	-	5	1	1	-	-	-	2	1
ABREZMRAB28	-	-	-	-	-	-	-	-	-	-	-	-	-	-	-	-	-	-	-	-	-	-	-	-	-	-	-	-	-	-	-	-	-	-	-	-	-	-	-	-	-	-	-	-	-	-	-	-	-
ACGTABOX	-	-	-	-	-	-	-	-	-	-	-	-	-	2	-	-	-	-	-	-	-	-	-	-	2	2	2	2	-	-	-	-	-	-	-	-	-	2	-	-	2	-	4	-	-	2	2	-	-
ACGTABREMOTIFA2OSEM	1	-	1	-	-	-	2	1	-	-	-	-	-	1	-	1	-	1	2	-	1	1	2	-	1	-	1	-	-	-	-	-	-	-	-	1	-	3	2	3	-	-	-	2	-	-	-	-	-
ACGTABREMOTIFAOSOSEM	-	-	-	-	-	-	-	1	-	-	-	-	-	-	-	-	-	-	-	-	-	-	-	-	-	-	-	-	-	-	-	-	-	-	-	-	-	-	-	-	-	-	-	-	-	-	-	-	-
ACGTATERD1	8	4	8	4	16	8	8	6	4	4	4	4	16	12	10	8	8	8	12	2	10	8	8	-	14	8	14	8	4	2	-	-	10	4	10	6	8	14	6	8	6	8	8	12	4	6	6	4	6
ACGTCBOX	-	-	2	-	-	-	-	-	-	-	-	-	-	-	-	-	-	-	2	-	2	-	-	-	-	2	-	-	-	-	-	-	-	-	-	-	-	-	-	-	-	-	-	2	-	-	-	-	-
ACGTOSGLUB1	-	-	-	-	1	-	-	-	-	-	-	-	-	-	2	-	-	1	-	-	-	-	-	-	-	-	-	-	-	-	-	-	-	-	-	-	-	1	-	-	-	-	-	-	-	1	1	-	-
ACGTTBOX	-	-	-	-	-	-	-	-	-	-	-	-	-	-	-	-	-	-	-	-	-	-	-	-	-	-	-	-	-	2	-	-	-	-	2	-	-	-	-	-	-	2	-	-	-	-	-	-	-
ACIIIPVPAL2	-	-	-	-	-	-	-	-	-	-	-	-	-	-	-	-	-	-	-	-	-	-	-	-	1	-	1	-	-	-	-	-	-	-	-	-	-	-	-	-	-	-	-	-	-	-	-	-	-
AGATCONSENSUS	-	-	-	-	-	-	-	-	-	-	-	-	-	-	-	-	-	-	-	-	-	-	-	-	-	-	-	-	-	-	-	-	-	-	-	-	-	-	-	-	-	1	-	-	-	-	-	-	-
AGCBOXNPGLB	-	1	1	2	-	-	-	-	-	-	-	-	-	-	-	-	-	-	-	1	-	-	-	-	-	-	-	-	2	2	1	1	1	1	-	-	1	2	1	1	-	-	-	2	-	-	-	-	-
AGL2ATCONSENSUS	-	-	-	-	-	-	-	-	-	-	-	-	-	-	-	-	-	-	-	-	-	-	-	-	-	-	-	-	-	-	-	-	-	-	-	-	-	-	-	-	-	1	-	-	-	-	-	-	-
AGMOTIFNTMYB2	-	-	-	-	-	-	-	-	-	-	-	-	1	1	-	-	-	-	-	1	1	-	-	-	-	-	-	-	-	-	-	-	-	-	-	-	-	-	-	-	-	-	-	-	-	1	1	-	-
AMMORESIIUDCRNIA1	-	-	-	-	-	-	1	-	-	-	-	-	-	-	-	-	-	-	-	-	-	-	-	1	2	1	2	1	-	-	-	-	-	-	1	-	-	-	-	-	-	-	-	1	-	-	-	-	-
AMMORESIVDCRNIA1	-	-	1	1	-	-	-	-	-	1	-	-	1	1	1	1	-	-	-	-	-	-	-	1	-	2	-	-	-	-	-	-	-	-	-	-	-	-	1	-	-	-	-	1	-	-	-	-	-
AMMORESVDCRNIA1	-	-	-	-	-	-	-	-	-	-	-	-	-	-	-	-	-	-	-	-	-	-	-	-	-	-	-	-	-	-	-	-	-	-	-	-	-	-	-	-	-	-	-	-	-	-	-	-	-
AMYBOX1	-	1	2	-	-	1	-	-	1	-	-	-	2	-	-	2	-	-	1	-	1	2	2	-	-	-	-	3	-	-	-	-	-	-	1	-	-	1	-	-	-	-	-	1	-	-	-	-	2
AMYBOX2	-	-	1	1	-	-	-	-	-	1	-	-	1	1	1	1	-	-	-	-	-	-	1	-	1	-	-	-	-	-	-	-	-	-	-	-	-	1	-	-	-	-	-	-	-	-	-	-	1
ANAERO1CONSENSUS	2	1	-	3	1	1	-	-	-	-	-	2	1	3	-	1	1	-	-	1	2	-	-	3	4	1	4	2	-	1	-	1	1	-	-	3	-	-	-	-	-	1	3	-	1	2	2	1	2
ANAERO2CONSENSUS	2	5	1	-	1	-	-	1	2	2	4	3	-	-	2	-	-	-	-	-	1	1	1	-	-	-	2	-	2	4	2	-	-	2	-	1	1	1	1	-	4	4	3	-	-	-	-	-	-
ANAERO3CONSENSUS	1	1	-	-	-	-	-	-	-	-	-	-	1	-	-	1	-	-	-	-	-	-	-	-	-	-	-	-	-	-	-	-	1	1	1	-	-	-	-	-	-	-	-	-	3	-	-	-	-
ANAERO4CONSENSUS	1	1	-	-	-	-	-	-	-	-	-	-	-	1	-	-	-	-	-	-	-	-	-	-	-	-	-	1	-	-	-	-	-	-	-	-	-	-	-	-	-	-	-	-	-	-	-	-	-
ANAERO5CONSENSUS	-	-	-	-	-	-	-	-	-	-	-	-	-	-	-	-	-	-	-	-	-	-	-	-	-	-	-	-	-	-	-	-	-	-	-	-	-	-	-	-	-	1	-	-	-	-	-	-	-
ARE1	-	-	-	-	-	-	-	-	-	-	-	-	-	-	-	-	-	1	1	-	-	-	-	-	-	-	-	-	-	-	-	-	-	-	-	-	-	-	-	-	-	-	-	-	-	-	-	-	-
ARFAT	1	1	-	-	1	1	-	1	2	1	1	-	1	-	3	1	-	1	1	-	-	-	-	-	-	1	-	-	-	-	2	1	-	-	-	-	1	2	-	1	-	1	-	-	-	-	-	4	1
ARR1AT	8	12	12	10	10	15	11	3	9	9	9	10	14	22	17	13	11	5	6	7	13	14	13	15	21	10	13	18	8	10	5	14	16	11	12	7	12	16	21	23	14	6	11	10	13	11	10	12	13
ASF1MOTIFCAMV	3	3	5	2	1	1	1	-	2	1	2	2	2	2	-	4	2	4	4	3	1	1	1	2	1	4	1	2	1	-	-	2	1	1	3	2	3	3	2	3	4	1	-	2	1	3	2	-	-
AUXREPSIAA4	-	-	-	-	-	-	-	-	-	-	-	-	-	-	-	-	-	-	-	-	-	-	-	-	-	-	-	-	-	-	-	-	-	-	-	-	-	-	-	-	-	-	-	1	-	-	-	-	-
AUXRETGA1GMGH3	-	-	-	-	-	-	-	-	1	-	-	-	-	-	-	-	-	-	-	-	-	-	-	-	-	-	-	-	-	-	-	-	-	-	-	-	-	-	-	1	-	-	-	-	-	-	-	-	-
AUXRETGA2GMGH3	-	-	1	-	-	-	1	-	-	-	-	-	-	-	-	-	-	1	1	-	-	-	-	-	-	-	-	-	-	-	-	-	-	-	-	-	-	-	1	1	-	-	-	-	-	-	-	-	-
BIHD1OS	1	4	7	6	2	1	3	2	5	2	2	-	2	2	8	4	2	1	-	6	5	3	3	3	1	2	2	1	2	2	4	4	1	1	1	1	4	3	-	6	4	3	5	-	3	2	4	10	3
BOXCPSAS1	-	-	-	-	1	-	3	1	1	-	1	-	-	-	-	-	-	-	-	-	1	-	-	-	-	-	-	1	-	-	-	-	2	1	1	1	1	1	1	1	-	2	-	-	1	-	-	-	-
BOXIINTPATPB	1	1	1	-	-	1	-	-	1	-	-	-	-	-	-	1	1	-	-	1	-	2	1	2	-	-	2	1	-	-	-	-	1	1	1	-	-	1	-	3	-	-	3	-	-	-	-	-	-
BOXIIPCCHS	-	-	1	-	-	-	1	-	-	-	-	-	-	1	-	-	-	1	2	-	1	1	2	-	1	-	1	-	-	-	-	-	-	-	-	1	-	1	1	1	-	-	-	2	-	-	-	-	-
BOXLCOREDCPAL	1	1	1	2	1	2	-	1	-	4	2	2	-	2	-	-	1	-	-	2	1	-	1	-	1	-	1	1	-	-	-	1	-	-	-	-	-	1	1	1	1	1	-	1	-	2	-	-	-
BP5OSWX	-	-	-	-	1	-	-	-	-	-	-	-	1	-	1	-	-	-	-	-	1	-	-	-	-	-	-	-	-	-	-	-	-	-	-	-	1	1	-	-	-	1	-	-	-	-	-	-	-
BS1EGCCR	1	1	-	-	-	-	1	-	-	1	-	-	2	2	-	1	-	-	-	-	-	-	-	-	-	1	-	1	-	-	-	3	-	-	-	1	-	1	-	-	-	-	-	-	-	-	-	-	-
CAATBOX1	8	6	19	11	3	16	12	6	12	14	18	16	7	16	19	19	9	5	6	17	15	19	14	20	13	6	19	19	15	14	8	12	11	11	11	12	10	13	14	19	12	8	20	5	9	9	6	10	11
CAATBOX2	-	-	-	-	-	-	-	-	-	-	-	-	-	-	-	-	-	-	-	-	-	-	-	-	-	-	-	-	-	1	-	-	-	-	-	-	-	-	-	-	-	-	-	-	-	-	-	-	-
CACGCAATGMGH3	-	-	1	-	-	-	-	-	1	-	-	-	-	-	-	-	-	-	-	-	-	-	-	1	-	1	-	1	-	-	-	-	-	-	-	-	-	-	-	-	-	-	-	-	-	-	-	-	-
CACGTGMOTIF	-	-	-	-	2	-	2	2	-	2	-	-	-	-	-	2	-	2	4	-	-	-	-	-	2	2	2	2	-	-	-	-	-	-	-	-	-	-	-	-	-	2	-	-	-	-	-	-	-
CACTFTPPCA1	13	14	19	18	15	22	14	20	17	17	14	13	16	13	13	18	12	9	8	23	17	13	19	20	14	7	11	19	19	14	10	13	19	5	12	14	18	14	12	27	17	14	16	15	26	10	16	19	24
CANBNNAPA	3	4	1	2	1	1	1	-	-	2	1	1	-	-	-	-	2	-	1	1	2	1	-	1	1	-	1	-	-	-	1	1	1	2	3	1	1	-	-	-	-	3	2	3	-	1	1	2	1
CAREOSREP1	-	1	1	2	7	1	2	2	4	-	-	-	3	3	1	1	1	-	-	1	3	1	1	1	2	1	2	2	-	-	-	-	1	1	2	1	-	2	1	2	1	-	-	-	3	3	3	2	3
CARGATCONSENSUS	-	-	-	-	-	-	-	-	-	-	-	-	-	-	-	-	2	-	-	-	-	-	-	-	-	-	-	-	-	-	-	-	-	-	-	-	-	-	-	-	-	2	-	-	-	-	-	-	-
CARGCW8GAT	-	-	-	-	-	6	2	4	2	-	2	-	2	2	2	-	2	2	2	4	2	4	2	2	4	-	4	2	-	-	-	-	-	-	-	-	-	-	-	4	2	-	4	2	2	2	2	8	4
CATATGGMSAUR	-	-	2	-	-	2	2	-	4	-	-	-	-	6	-	2	2	-	-	-	-	-	2	-	-	2	2	4	2	2	2	-	2	-	2	-	-	2	-	-	-	-	-	2	-	2	2	2	6
CBFHV	1	2	-	2	-	1	2	9	-	-	3	1	5	3	1	6	5	7	8	1	3	1	2	2	6	5	1	4	1	2	3	5	4	2	9	3	4	2	1	2	-	1	2	8	2	2	5	-	2
CCA1ATLHCB1	-	-	-	3	-	-	-	-	-	-	-	-	1	1	-	-	-	-	-	1	-	-	-	1	1	1	-	1	1	1	1	-	-	-	-	-	-	1	2	1	-	-	1	-	1	1	1	-	-
CCAATBOX1	-	1	2	-	-	4	1	-	1	2	2	2	2	2	2	4	3	2	2	3	4	4	1	5	4	1	5	3	6	6	4	2	5	7	6	2	4	5	5	9	3	1	4	2	1	4	2	6	3
CDA1ATCAB2	-	-	-	-	-	1	-	1	-	-	-	-	-	-	-	-	-	-	-	-	-	-	-	-	-	-	-	-	-	-	-	-	-	-	-	-	-	-	-	-	-	1	-	-	-	-	-	-	-
CELLCYCLESC	-	-	1	-	-	-	-	1	-	-	-	-	-	1	-	-	-	-	-	-	-	-	-	-	1	-	-	-	-	-	-	-	-	-	-	-	-	-	-	-	-	1	-	1	-	-	-	-	-
CEREGLUBOX1PSLEGA	-	-	-	-	-	-	-	-	-	1	-	-	-	-	-	-	-	-	-	-	-	-	-	1	-	-	-	-	-	-	-	-	-	-	-	-	-	-	-	-	-	-	-	-	-	-	-	-	-
CEREGLUBOX2PSLEGA	-	-	1	-	-	-	-	-	-	-	-	-	-	-	-	-	-	-	-	-	-	-	-	-	-	-	-	-	-	-	-	-	-	-	-	-	-	-	-	-	-	-	-	-	-	-	-	-	1
CGACGOSAMY3	6	6	5	4	-	2	3	3	4	1	1	1	3	2	3	4	9	8	10	2	5	1	1	2	3	16	-	2	4	3	3	1	4	3	2	5	4	3	2	2	1	3	2	7	2	1	2	-	4
CGCGBOXAT	-	2	2	10	12	10	-	6	4	12	12	10	14	8	10	8	12	30	26	2	6	4	4	-	12	12	2	-	6	6	8	6	4	2	4	16	10	4	8	2	2	10	2	14	6	4	6	4	4
CIACADIANLELHC	-	1	-	-	-	1	1	-	1	1	-	1	3	2	1	3	-	1	-	-	3	2	2	-	3	-	3	-	2	1	1	2	-	-	1	2	1	-	1	-	-	1	1	1	2	-	-	-	2
CMSRE1IBSPOA	1	-	1	1	-	-	-	-	-	-	-	1	-	-	1	-	-	1	-	1	-	-	-	-	-	-	-	-	-	-	-	-	1	-	-	1	-	-	-	-	-	-	-	-	-	-	-	-	-
CPBCSPOR	-	-	-	1	-	-	-	2	-	-	-	-	-	-	-	-	-	-	-	1	1	-	1	3	-	2	-	1	-	-	-	-	1	-	-	-	-	-	-	1	-	2	1	1	1	-	-	-	-
CPRFPCCHS	-	-	-	-	-	-	-	-	-	-	-	-	-	-	-	-	-	-	-	-	-	-	-	-	-	-	-	-	-	-	-	-	-	-	-	-	-	-	-	-	-	-	-	-	-	-	-	-	-
CRTDREHVCBF2	-	-	-	-	-	-	2	2	-	-	-	-	-	-	-	4	2	2	2	-	-	-	-	-	2	-	-	-	-	-	-	2	2	-	-	-	2	-	-	-	-	-	-	4	-	-	-	-	2
CTRMCAMV35S	-	-	-	1	-	-	-	-	-	-	2	-	-	-	-	-	2	6	2	-	-	-	-	-	-	-	-	-	2	-	1	-	-	-	-	-	-	-	1	-	-	-	-	-	-	-	1	-	-
CURECORECR	4	4	16	18	10	6	6	14	8	10	6	4	10	-	4	4	4	12	6	8	8	2	2	10	6	8	8	10	6	6	2	6	6	6	6	6	-	16	10	8	10	4	6	4	12	10	10	8	6
D1GMAUX28	-	-	-	-	-	-	-	-	-	-	-	-	-	-	-	-	-	-	-	-	-	-	-	-	-	-	-	1	-	-	-	-	-	-	-	-	-	-	-	-	-	-	-	-	-	-	-	-	-
DOFCOREZM	14	15	14	11	15	19	11	14	14	3	5	4	13	17	17	10	4	5	6	11	18	28	26	21	21	6	30	16	14	16	4	19	16	10	11	11	19	7	13	9	12	13	17	4	13	14	18	22	22
DPBFCOREDCDC3	3	4	3	1	15	2	2	1	2	8	6	4	1	3	2	5	3	2	2	3	2	5	4	1	4	3	1	3	1	2	2	2	3	1	2	2	3	1	-	1	4	7	2	3	1	1	3	6	5
DRE2COREZMRAB17	-	-	-	-	-	-	-	2	-	-	1	-	1	-	-	1	-	3	4	-	1	-	1	1	2	2	1	1	-	-	1	2	1	1	4	-	-	-	-	-	-	-	-	1	1	-	1	-	-
DRECRTCOREAT	-	1	-	1	-	-	-	6	-	-	2	-	5	-	1	1	2	5	6	-	2	-	1	1	3	3	1	1	1	1	3	2	2	2	8	3	1	-	-	-	-	1	2	3	1	-	3	-	-
E2F1OSPCNA	-	-	-	-	-	-	-	-	-	-	-	-	-	-	-	-	-	-	-	-	-	-	-	-	-	-	-	-	-	-	-	-	-	-	-	-	-	-	-	-	-	-	-	-	-	-	-	-	-
E2FANTRNR	-	-	-	-	-	-	-	-	-	-	-	-	-	-	-	-	-	-	-	-	-	-	-	-	-	-	-	-	-	-	-	-	-	-	-	-	-	-	-	-	-	-	-	-	-	-	-	-	-
E2FAT	-	-	-	-	-	-	-	-	-	-	-	-	-	-	-	-	-	-	-	-	-	-	-	-	-	-	-	-	-	-	-	-	-	-	-	-	-	-	-	-	-	-	-	-	-	-	-	-	-
E2FBNTRNR	-	-	-	-	-	-	-	-	-	-	-	-	-	-	-	-	-	-	-	-	-	-	-	-	-	-	-	-	-	-	-	-	-	-	-	-	-	-	-	-	-	-	-	2	-	-	-	-	-
E2FCONSENSUS	-	3	-	2	1	-	-	1	-	-	1	-	1	-	-	-	1	2	3	-	1	1	1	3	1	4	1	2	-	1	1	2	2	2	3	2	1	1	1	1	-	-	-	2	1	-	-	1	1
EBOXBNNAPA	10	20	24	10	46	4	20	2	16	16	18	16	4	16	16	12	4	4	6	12	12	20	14	6	10	10	16	12	8	6	4	14	10	6	8	14	8	16	2	12	10	22	12	6	8	10	12	16	16
EECCRCAH1	1	2	4	-	6	1	2	1	3	2	4	3	1	1	2	2	3	5	4	2	3	4	4	4	3	3	1	4	3	5	-	-	5	3	3	2	2	2	4	4	3	1	2	1	4	2	3	2	3
ELRECOREPCRP1	1	1	2	3	1	2	-	1	-	-	-	-	-	-	1	3	-	-	-	1	2	2	1	2	1	-	1	-	-	1	1	1	-	-	-	-	2	-	-	-	-	1	-	1	-	2	2	-	1
ELRENTCHN50	-	-	-	-	-	-	-	-	-	-	-	-	-	-	-	-	-	-	-	-	-	-	-	-	-	-	-	-	-	-	-	-	-	-	-	-	-	-	-	-	-	-	-	-	-	-	-	-	-
EMBP1TAEM	-	-	-	-	-	-	-	-	-	-	-	-	-	-	-	-	-	-	1	-	-	-	-	-	-	-	-	-	-	-	-	-	-	-	-	-	-	-	-	-	-	-	-	-	-	-	-	-	-
EMHVCHORD	-	-	-	-	-	-	-	-	1	-	-	-	-	-	-	-	-	-	-	-	-	-	-	-	-	-	-	-	-	-	-	-	-	-	-	1	-	-	-	-	-	-	-	-	-	-	-	-	-
ERELEE4	-	-	-	-	-	-	1	1	-	1	1	-	-	1	-	1	-	-	-	-	-	1	-	-	-	-	-	1	-	-	-	-	-	-	-	-	-	-	-	1	1	-	4	-	-	-	-	2	1
EVENINGAT	-	-	-	1	-	-	-	-	-	-	-	-	-	-	-	-	-	-	-	-	-	-	-	-	-	-	-	-	-	-	-	-	-	-	-	-	-	1	-	-	-	-	-	1	-	1	1	-	-
GADOWNAT	1	-	-	-	-	-	1	1	-	-	-	-	-	-	-	1	-	-	-	-	-	-	-	-	-	-	-	-	-	-	-	-	-	-	-	-	-	2	1	2	-	-	-	-	-	-	-	-	-
GAGA8HVBKN3	-	-	-	-	-	-	-	-	-	-	-	-	-	-	-	-	-	2	-	-	-	-	-	-	-	-	-	-	-	-	-	-	-	-	-	-	-	-	-	-	-	-	-	-	-	-	-	-	-
GAGAGMGSA1	-	-	-	-	-	-	-	-	-	-	-	-	-	-	-	-	-	1	-	-	-	-	-	-	-	-	-	-	-	-	-	-	-	-	-	-	-	-	-	-	-	-	-	-	-	-	-	-	-
GARE1OSREP1	-	-	1	-	-	-	-	-	1	-	-	-	2	-	-	2	-	-	-	-	-	1	1	-	-	-	-	-	-	-	-	-	-	-	-	-	-	-	-	-	-	-	-	1	-	-	-	-	-
GARE2OSREP1	-	-	-	-	-	-	-	-	-	-	-	-	-	-	-	-	-	-	-	-	-	-	-	-	1	-	1	-	-	-	-	-	-	-	-	-	-	-	-	-	-	-	-	-	-	-	-	-	-
GAREAT	1	2	2	-	-	1	-	-	-	-	-	-	-	1	1	1	-	-	1	-	1	1	1	-	1	-	1	3	-	-	-	-	-	-	1	-	-	1	-	-	1	-	-	-	-	-	-	1	2
GATABOX	5	8	6	10	5	8	7	5	9	3	4	3	10	9	12	12	11	3	1	7	9	9	10	6	8	1	5	7	11	8	7	5	8	5	7	7	9	13	7	13	7	3	5	6	13	7	5	10	18
GBOX10NT	-	-	-	-	-	-	-	-	-	-	-	-	-	-	-	-	-	-	-	-	-	-	-	-	-	-	-	-	-	-	-	-	-	-	-	-	-	-	-	-	-	-	-	-	-	-	-	-	-
GBOXLERBCS	-	-	-	-	-	-	-	-	-	-	-	-	-	-	-	-	-	-	-	-	-	-	-	-	-	-	-	-	-	-	-	-	-	-	-	-	-	-	-	-	-	-	-	-	-	-	-	-	-
GCAACREPEATZMZEIN	-	-	-	-	-	-	-	-	-	-	-	-	-	-	-	-	-	-	-	-	-	-	-	-	-	-	-	-	-	-	-	-	-	-	-	-	-	-	-	-	-	-	-	-	-	-	-	-	-
GCBP2ZMGAPC4	-	-	-	-	-	-	-	-	-	-	1	1	-	-	-	-	-	-	-	-	-	-	-	-	-	-	-	-	-	-	-	-	-	-	-	-	-	-	-	-	-	-	-	-	-	-	-	-	-
GCCCORE	1	2	4	3	1	1	1	1	2	2	2	-	2	2	1	2	6	8	9	2	2	1	1	-	1	12	-	-	9	8	8	5	4	4	4	1	2	3	2	2	-	-	-	5	1	1	2	-	1
GCN4OSGLUB1	-	-	-	-	-	-	1	-	-	-	-	-	-	-	-	1	-	-	-	-	-	-	-	-	-	-	-	-	-	-	-	2	1	1	1	-	-	-	-	-	-	-	-	-	-	-	-	-	-
GGTCCCATGMSAUR	-	-	-	-	-	-	-	-	-	-	-	-	-	-	-	-	-	-	-	-	-	-	-	-	-	-	-	-	-	-	-	-	-	-	-	-	-	-	-	-	-	-	-	-	-	-	-	-	-
GLMHVCHORD	-	-	-	-	-	-	-	-	-	-	-	-	-	-	-	-	-	-	-	-	-	-	-	-	-	-	-	-	-	-	-	-	1	1	1	-	-	-	-	-	-	-	-	-	-	-	-	-	-
GT1CONSENSUS	8	9	9	13	8	10	6	10	5	2	3	4	5	14	8	15	9	2	1	9	9	10	11	16	8	2	6	8	6	7	3	-	13	10	10	9	11	9	11	10	11	12	14	3	8	3	7	21	14
GT1CORE	-	1	-	-	-	1	-	4	-	2	1	-	-	1	1	1	-	-	-	-	1	-	-	-	1	-	1	-	1	1	-	3	2	2	2	-	-	-	-	1	1	-	-	-	-	-	-	-	1
GT1GMSCAM4	2	3	2	5	3	3	1	4	1	-	1	1	2	9	3	5	4	-	-	2	1	2	1	6	3	1	2	3	1	1	-	-	1	1	2	3	1	1	3	4	3	3	7	1	1	1	2	6	4
GT1MOTIFPSRBCS	-	-	-	-	-	-	-	-	-	-	-	-	-	-	-	-	-	-	-	-	1	-	-	-	-	-	-	-	-	-	-	-	-	-	-	1	-	-	-	-	-	-	-	-	-	-	-	-	-
GTGANTG10	6	10	9	9	4	6	8	3	7	4	7	4	9	8	12	13	11	7	7	8	4	6	7	9	9	7	6	11	8	5	2	11	8	7	10	8	10	9	7	11	6	10	7	6	12	11	13	7	11
HBOXCONSENSUSPVCHS	-	-	-	-	-	-	-	-	-	-	-	-	-	-	-	-	-	-	-	-	-	-	-	-	-	-	-	-	-	-	-	-	-	-	-	-	-	-	-	-	-	-	-	-	-	-	-	-	-
HDZIP2ATATHB2	-	-	-	-	-	-	-	-	-	-	-	-	-	-	-	-	-	-	-	-	-	-	-	-	-	-	-	-	-	-	-	-	-	-	-	-	-	1	-	-	-	-	-	-	-	-	-	-	1
HEXAMERATH4	4	3	1	1	-	-	1	1	2	-	-	-	2	-	1	2	7	3	2	2	-	-	-	1	-	4	-	2	-	-	1	1	1	1	-	-	2	-	-	-	-	1	1	2	1	-	-	-	1
HEXAT	-	-	1	-	-	-	1	-	-	-	-	-	-	-	-	-	-	2	2	-	-	-	-	-	-	-	-	-	-	-	-	-	-	-	-	-	-	1	1	1	-	-	-	-	-	-	-	-	-
HEXMOTIFTAH3H4	1	1	3	-	-	-	1	-	1	-	1	1	1	1	-	2	1	2	2	-	1	-	-	-	1	-	-	1	-	-	-	-	-	-	-	-	1	1	1	2	1	-	-	-	-	-	-	-	-
HSELIKENTACIDICPR1	-	-	-	-	-	-	-	-	-	-	-	-	-	-	-	-	-	-	-	-	-	-	-	-	-	-	-	-	-	-	-	-	-	-	-	-	-	-	-	-	2	-	-	-	-	-	-	-	-
IBOX	-	-	-	-	-	1	-	-	-	-	-	-	1	-	1	-	1	-	-	-	-	-	-	-	1	-	-	-	-	-	-	-	2	1	2	1	-	-	-	-	-	-	-	-	-	-	-	-	2
IBOXCORE	1	1	1	3	2	2	-	1	2	-	1	-	3	-	5	4	2	1	-	2	3	5	5	2	4	1	2	2	3	3	4	1	5	3	5	2	2	2	1	3	2	-	2	2	4	2	1	5	6
IBOXCORENT	-	-	-	-	-	-	-	-	-	-	-	-	1	-	-	-	1	-	-	-	-	-	-	-	1	-	-	-	-	-	-	-	1	1	1	-	-	-	-	-	-	-	-	-	-	-	-	-	2
INRNTPSADB	-	2	2	-	-	2	1	3	3	3	3	1	1	-	-	1	1	1	1	2	3	3	2	-	3	1	3	1	3	2	-	-	2	1	3	3	2	1	2	2	3	1	2	4	2	1	2	3	4
INTRONLOWER	-	2	2	2	1	-	2	2	-	1	1	-	-	-	-	1	1	-	1	1	-	1	-	-	1	-	-	-	-	-	-	-	-	-	1	2	-	1	-	1	4	-	-	1	-	-	-	-	-
IRO2OS	-	-	-	-	-	-	1	1	-	-	-	-	-	-	-	-	-	1	2	-	-	-	-	-	-	-	-	-	-	-	-	-	-	-	-	-	-	-	-	-	-	-	-	-	-	-	-	-	-
L1BOXATPDF1	-	-	-	-	-	-	-	-	-	-	-	-	-	-	1	-	-	-	-	-	-	-	-	1	-	-	-	-	-	-	-	-	-	-	-	-	-	-	-	-	-	-	1	1	-	-	-	-	1
LBOXLERBCS	-	-	-	-	-	-	-	-	-	-	-	-	-	-	-	-	-	-	-	-	-	-	-	-	-	-	-	-	-	-	-	-	-	1	1	-	-	-	-	-	-	-	-	-	-	-	-	-	-
LEAFYATAG	-	-	-	-	-	-	-	-	-	-	1	-	-	-	-	1	1	-	-	-	-	1	-	-	-	-	-	1	-	-	-	-	-	1	-	-	-	-	-	-	-	-	1	-	-	1	-	4	-
LECPLEACS2	-	-	-	1	1	1	-	-	-	-	-	-	-	-	-	2	-	-	-	1	-	-	-	-	1	-	1	-	-	-	-	-	-	-	-	-	-	-	-	-	-	-	-	1	1	2	1	2	-
LRENPCABE	-	-	-	-	-	-	-	-	-	-	-	-	-	-	-	-	-	-	-	-	-	-	-	-	-	-	-	-	-	-	-	-	-	-	-	-	-	-	-	-	-	-	-	1	-	-	-	-	-
LTRE1HVBLT49	-	-	-	1	1	1	1	-	-	-	2	-	1	-	-	-	1	-	-	-	-	-	-	1	2	1	1	1	-	-	-	-	2	-	1	1	-	1	1	1	1	-	-	1	1	2	1	-	-
LTREATLTI78	-	-	-	-	-	-	-	-	-	-	-	-	1	-	-	1	-	1	1	-	-	-	1	-	-	-	1	-	-	-	-	1	-	-	1	-	-	-	-	-	-	-	-	-	-	-	-	-	-
LTRECOREATCOR15	2	2	1	2	3	-	3	7	1	-	2	-	8	1	2	6	3	9	11	1	2	1	2	1	3	5	1	2	4	2	4	3	2	2	8	5	2	1	2	1	-	1	2	6	6	1	4	1	1
MARABOX1	-	-	-	-	1	1	-	-	-	-	-	-	-	-	-	-	-	-	-	1	-	-	-	-	-	-	-	-	-	-	-	-	1	1	1	-	-	-	-	-	-	-	-	-	1	2	1	-	-
MARARS	-	-	-	-	-	-	-	-	-	-	-	-	-	1	-	-	-	-	-	-	-	-	-	-	-	-	-	-	-	-	-	-	-	-	-	-	-	-	-	-	-	-	-	-	-	-	-	-	1
MARTBOX	1	-	-	1	-	2	-	1	-	-	-	4	-	1	-	-	1	-	-	-	-	4	-	-	-	-	-	-	-	-	-	-	4	1	2	-	-	-	2	-	-	-	-	-	-	-	-	-	1
MNF1ZMPPC1	-	-	-	-	-	-	-	-	-	-	-	-	-	-	-	-	1	-	-	-	-	-	-	-	-	-	-	-	-	-	-	-	-	-	-	-	-	-	-	-	-	-	-	-	-	-	-	-	-
MSACRCYM	-	-	-	-	-	-	-	-	-	-	-	-	-	-	-	-	-	-	-	-	-	-	-	-	-	-	-	-	-	-	-	-	-	-	-	-	-	-	-	-	-	-	-	-	-	-	-	-	-
MYB1AT	2	5	5	1	-	2	1	4	-	3	2	-	-	1	1	1	-	-	2	2	1	2	3	3	3	-	4	3	1	1	1	1	2	4	2	2	1	1	1	1	2	3	2	-	3	2	2	1	3
MYB1LEPR	-	-	1	-	-	-	-	-	-	1	-	-	-	-	-	-	-	-	-	-	-	-	-	-	-	2	-	-	-	-	-	-	-	-	-	-	1	-	-	-	-	-	-	-	-	-	-	1	-
MYB26PS	-	-	-	-	-	-	-	-	-	-	-	-	-	-	-	-	-	-	-	-	-	-	-	-	1	-	1	-	-	-	-	-	-	1	-	-	-	-	-	-	-	-	-	1	-	-	-	-	-
MYB2AT	-	-	-	1	2	-	-	1	-	-	-	1	-	1	1	2	1	-	-	-	-	-	-	1	-	-	-	1	-	-	-	1	1	1	-	1	-	-	-	-	-	-	1	1	1	-	-	-	-
MYB2CONSENSUSAT	2	4	3	4	13	1	2	1	1	-	3	1	-	2	3	2	1	-	-	2	-	1	-	1	1	1	1	2	-	-	-	1	2	2	1	1	2	2	2	1	2	-	2	1	3	2	1	2	1
MYBATRD22	-	1	-	-	-	-	-	-	-	1	-	-	-	-	-	1	-	-	-	-	-	-	-	-	1	-	1	-	-	-	-	-	-	-	-	1	-	-	-	-	-	-	-	-	-	-	-	-	-
MYBCORE	3	6	5	5	15	3	4	2	7	2	4	3	6	4	5	5	2	2	1	5	3	4	4	3	4	2	1	6	-	-	-	6	4	4	4	5	5	3	3	1	3	2	3	3	4	3	2	4	3
MYBCOREATCYCB1	4	4	3	5	1	-	-	4	1	2	5	2	-	-	2	-	4	2	2	2	1	1	-	1	3	2	1	1	1	1	1	-	-	1	-	2	4	2	2	1	3	2	1	3	1	1	1	3	1
MYBGAHV	-	1	1	-	-	1	-	-	-	-	-	-	-	-	-	-	-	-	1	-	1	1	1	-	-	-	-	3	-	-	-	-	-	-	1	-	-	1	-	-	-	-	-	-	-	-	-	-	2
MYBPLANT	1	1	-	-	-	-	-	-	-	1	1	-	-	1	-	-	-	-	-	-	1	1	1	1	2	1	2	1	-	-	-	1	-	1	-	-	-	2	3	3	-	1	-	1	-	1	-	1	-
MYBPZM	1	1	-	-	-	1	1	-	1	6	3	4	4	3	-	-	1	1	1	3	1	-	2	2	4	2	3	3	5	3	3	2	2	1	2	-	1	4	2	2	2	2	-	2	2	3	2	-	-
MYBST1	2	3	2	2	1	-	-	3	2	2	1	3	2	5	2	2	6	2	1	2	3	4	3	-	3	-	-	1	3	3	3	1	4	3	4	3	3	5	2	3	2	1	-	2	-	-	-	5	3
MYCATERD1	-	2	7	1	6	-	1	-	1	2	1	1	1	1	1	2	-	-	-	-	1	4	-	-	-	-	1	1	-	-	-	1	1	-	-	1	-	4	-	2	-	3	3	-	1	1	1	4	1
MYCATRD22	-	2	7	1	6	-	1	-	1	2	1	1	1	1	1	2	-	-	-	-	1	4	-	-	-	-	1	1	-	-	-	1	1	-	-	1	-	4	-	2	-	3	3	-	1	1	1	4	1
MYCCONSENSUSAT	10	20	24	10	46	4	20	2	16	16	18	16	4	16	16	12	4	4	6	12	12	20	14	6	10	10	16	12	8	6	4	14	10	6	8	14	8	16	2	12	10	22	12	6	8	10	12	16	16
NAPINMOTIFBN	1	-	-	-	-	-	-	-	-	-	-	-	-	-	-	1	-	-	-	-	-	-	1	-	-	-	1	-	-	-	-	-	-	-	-	1	-	-	-	-	-	-	1	-	-	-	-	-	1
NODCON1GM	1	-	2	-	1	3	1	1	1	-	-	-	2	1	2	-	-	-	-	1	3	3	2	4	1	2	1	2	-	-	-	-	2	-	-	1	-	-	1	-	1	-	1	-	2	1	1	-	2
NODCON2GM	2	6	1	3	4	1	1	1	3	-	1	1	4	2	11	5	1	4	3	5	3	3	4	4	5	2	5	6	7	8	3	2	9	6	6	2	2	2	3	4	3	2	-	4	2	3	3	2	4
NONAMERATH4	-	-	-	-	-	-	-	-	-	-	-	-	-	-	-	-	-	-	-	-	-	-	-	-	-	-	-	1	-	-	-	-	-	-	-	-	1	-	-	-	-	-	-	-	-	-	-	-	-
NONAMERMOTIFTAH3H4	-	-	-	-	-	-	-	-	-	-	-	-	-	-	-	-	-	-	-	-	1	-	-	-	-	1	-	-	-	-	-	-	-	-	-	-	-	-	1	-	-	-	-	-	-	-	-	-	-
NRRBNEXTA	-	-	-	-	-	-	-	-	-	-	-	-	-	-	-	-	-	-	-	-	-	1	-	-	-	-	-	1	-	-	-	-	-	-	-	-	-	-	-	1	-	-	-	1	-	-	-	-	-
NTBBF1ARROLB	-	-	1	-	2	2	-	1	1	1	1	-	-	-	-	-	-	-	-	-	-	-	1	3	1	-	1	-	-	1	-	1	-	-	-	1	1	-	-	-	1	1	1	-	1	-	1	2	1
OCTAMERMOTIFTAH3H4	-	-	-	-	-	-	-	-	-	-	1	-	-	-	-	-	-	1	1	-	-	-	-	-	-	-	-	-	-	-	-	-	-	-	-	-	-	-	-	-	-	-	-	-	1	-	1	-	-
OCTAMOTIF2	-	-	-	-	-	-	-	-	-	1	1	1	-	-	-	-	-	-	-	-	-	-	-	-	-	1	-	-	-	-	-	-	-	-	-	-	-	-	-	-	-	-	-	-	1	1	1	-	-
OPAQUE2ZMB32	-	-	-	1	-	-	-	-	-	-	-	-	-	-	-	-	-	-	-	-	-	-	-	-	-	-	-	-	-	-	-	-	-	-	-	-	-	-	-	-	-	-	-	-	-	-	-	-	-
OSE1ROOTNODULE	1	-	2	-	1	3	1	1	1	-	-	-	2	1	2	-	-	-	-	1	3	3	2	4	1	2	1	2	-	-	-	-	2	-	-	1	-	-	1	-	1	-	1	-	2	1	1	-	2
OSE2ROOTNODULE	2	6	1	3	4	1	1	1	3	-	1	1	4	2	11	5	1	4	3	5	3	3	4	4	5	2	5	6	7	8	3	2	9	6	6	2	2	2	3	4	3	2	-	4	2	3	3	2	4
P1BS	-	-	2	-	-	-	-	-	-	4	-	-	-	4	-	-	-	-	-	2	-	-	-	-	4	-	2	2	2	2	2	-	-	-	-	-	-	2	-	-	-	-	-	-	-	-	-	2	-
PALBOXAPC	2	-	2	3	2	1	-	-	1	3	3	3	2	1	3	2	4	7	6	1	-	-	-	-	1	1	-	-	-	-	-	-	1	-	-	2	-	1	1	2	-	-	-	2	-	-	-	-	-
PALBOXPPC	-	-	-	-	-	-	-	-	-	-	1	-	-	-	-	-	-	-	-	-	-	-	-	-	1	-	1	-	-	-	-	-	-	-	-	-	-	-	-	-	-	-	-	-	-	-	-	-	-
PALINDROMICCBOXGM	-	-	2	-	-	-	-	-	-	-	-	-	-	-	-	-	-	-	-	-	-	-	-	-	-	-	-	-	-	-	-	-	-	-	-	-	-	-	-	-	-	-	-	-	-	-	-	-	-
PE2FNTRNR1A	-	-	-	-	1	-	-	-	-	-	-	-	-	-	-	-	-	-	-	-	-	-	-	-	-	-	-	-	-	-	-	-	-	-	-	-	-	-	-	-	-	-	-	-	-	-	-	-	-
POLASIG1	1	1	3	2	4	5	2	3	-	2	-	2	-	-	2	-	1	-	-	3	2	2	2	3	-	1	3	1	-	1	-	-	5	4	5	4	1	-	1	1	1	1	4	-	5	5	4	3	2
POLASIG2	-	-	2	1	-	-	-	-	1	-	2	-	-	-	-	1	-	-	-	-	1	1	1	-	-	-	-	-	-	-	-	-	-	-	-	-	-	1	-	1	-	3	2	-	-	-	-	2	1
POLASIG3	1	1	-	1	1	1	-	2	-	-	-	1	-	-	-	1	1	1	1	3	1	-	-	1	-	-	-	2	3	3	4	2	2	-	1	1	-	3	5	1	2	2	8	-	4	4	4	1	2
POLLEN1LELAT52	2	4	7	3	2	6	3	6	7	2	3	1	4	6	5	3	2	2	2	5	9	9	7	7	4	1	1	3	-	1	2	4	4	2	3	8	10	3	7	7	8	2	9	2	6	3	7	11	9
PREATPRODH	-	-	-	-	-	1	1	1	1	-	-	-	1	1	-	2	2	1	1	2	1	-	-	-	1	-	-	1	-	-	-	-	-	-	-	-	-	2	1	1	-	-	-	-	2	1	-	2	4
PRECONSCRHSP70A	3	3	1	2	2	-	3	3	2	2	1	1	2	1	3	3	1	2	2	1	2	1	-	3	1	5	-	3	1	1	1	2	5	4	6	3	2	3	3	-	-	4	1	1	4	-	1	2	-
PROLAMINBOXOSGLUB1	1	1	-	1	1	1	-	-	1	-	-	-	-	-	1	-	-	-	1	-	-	-	-	2	-	1	1	-	-	-	-	-	-	-	-	-	-	-	-	-	-	-	-	-	-	-	-	-	-
PROXBBNNAPA	-	-	-	-	-	-	-	-	-	-	-	-	-	-	-	-	-	-	-	-	-	-	-	1	1	-	-	-	-	-	-	-	1	1	2	-	-	-	-	-	-	-	-	1	-	-	-	-	-
PYRIMIDINEBOXHVEPB1	-	-	-	1	1	-	-	1	-	-	-	-	-	1	-	1	1	-	-	-	1	1	-	1	-	1	-	1	-	-	-	-	-	-	-	1	-	-	2	-	-	-	2	-	-	-	-	1	2
PYRIMIDINEBOXOSRAMY1A	-	1	-	2	1	1	4	1	-	-	1	-	-	2	2	-	1	-	-	1	1	2	2	-	1	-	1	-	-	2	-	2	1	1	1	1	1	1	2	1	-	4	1	-	1	-	-	1	-
QARBNEXTA	1	-	-	-	-	-	-	-	-	-	-	-	-	-	-	-	-	-	-	-	-	-	-	-	-	-	-	-	-	-	-	-	2	1	1	-	-	1	1	1	-	-	-	-	-	-	-	-	-
QELEMENTZMZM13	-	-	-	-	1	1	-	-	-	2	1	1	-	-	1	1	-	-	-	1	1	-	1	-	-	-	1	-	1	1	-	-	1	1	1	-	1	1	-	-	-	1	-	2	-	-	-	-	1
RAV1AAT	7	11	4	2	3	7	4	5	6	5	4	1	6	10	1	5	1	2	2	10	3	3	5	4	8	-	5	5	3	4	1	6	4	4	3	7	4	1	9	2	5	5	4	1	8	3	6	1	3
RAV1BAT	2	2	1	3	1	-	-	-	2	-	-	-	-	-	-	-	-	-	-	1	1	2	2	-	2	2	1	-	2	2	1	2	1	1	1	-	1	-	-	-	1	2	-	-	-	-	-	-	1
RBCSCONSENSUS	-	-	-	-	-	-	2	-	-	1	1	1	1	-	-	-	-	-	-	-	-	-	-	-	1	-	1	1	1	1	1	1	-	-	-	-	-	-	1	1	1	-	-	2	2	-	-	-	-
RBCSGBOXPS	-	-	-	-	1	-	-	-	-	-	-	-	-	-	-	-	-	-	-	-	-	-	-	-	-	-	-	-	-	-	-	-	-	-	-	-	-	-	-	-	-	-	-	-	-	-	-	-	-
REALPHALGLHCB21	-	2	2	2	-	1	3	2	-	1	1	-	1	1	-	1	1	-	1	2	-	1	-	2	2	-	4	2	-	1	-	1	1	2	1	1	-	1	1	1	3	5	1	-	1	-	-	3	2
REBETALGLHCB21	1	2	-	1	1	-	-	-	-	-	-	1	-	2	-	-	2	2	1	1	-	-	-	-	1	-	-	-	1	1	1	-	2	2	2	-	-	-	-	-	-	-	-	1	-	-	-	-	-
RGATAOS	-	-	-	-	-	-	-	-	-	-	-	-	-	-	-	-	-	-	-	-	-	-	-	-	-	-	-	-	-	-	-	-	-	-	-	-	-	-	-	-	-	-	-	-	-	-	-	-	-
RHERPATEXPA7	3	3	3	1	5	1	2	7	1	2	1	3	2	2	2	3	1	1	1	3	3	2	3	1	3	2	3	2	1	-	-	1	3	1	3	2	1	2	2	-	-	11	3	5	3	2	3	2	1
ROOTMOTIFTAPOX1	2	3	1	7	3	5	5	6	4	-	2	1	5	6	2	7	3	2	2	7	2	8	7	8	5	1	3	2	4	4	1	1	3	4	3	2	-	7	3	13	-	2	13	7	5	5	5	9	11
RYREPEATBNNAPA	-	-	4	7	1	1	-	3	1	1	1	-	3	2	-	3	-	-	-	-	2	1	2	8	-	3	2	1	-	-	-	2	-	-	-	1	1	-	1	-	-	2	1	2	-	1	3	-	-
RYREPEATGMGY2	-	-	-	1	-	1	-	2	-	-	-	-	-	-	-	1	-	-	-	-	-	1	1	7	-	2	-	-	-	-	-	-	-	-	-	-	-	-	-	-	-	-	1	-	-	1	3	-	-
RYREPEATLEGUMINBOX	-	-	2	5	-	1	-	3	-	-	-	-	-	-	-	1	-	-	-	-	1	1	1	8	-	2	-	1	-	-	-	-	-	-	-	-	-	-	-	-	-	2	1	1	-	1	3	-	-
RYREPEATVFLEB4	-	-	-	-	-	-	-	-	-	-	-	-	-	-	-	-	-	-	-	-	-	-	-	4	-	-	-	-	-	-	-	-	-	-	-	-	-	-	-	-	-	-	-	-	-	-	2	-	-
S1FBOXSORPS1L21	-	-	1	-	1	2	-	1	-	-	-	-	2	2	-	-	-	-	-	1	1	-	1	1	-	-	-	1	-	-	-	1	1	1	2	1	-	1	-	-	-	-	-	-	2	3	3	-	-
S1FSORPL21	-	-	-	-	-	-	-	-	-	-	-	-	-	-	-	-	-	-	-	-	-	-	-	1	-	-	-	-	-	-	-	-	-	-	-	-	-	-	-	-	-	-	-	-	-	-	-	-	-
S2FSORPL21	-	-	-	-	-	-	-	-	-	-	-	-	-	-	-	1	-	-	-	-	-	-	-	-	-	-	-	-	-	1	-	-	-	-	-	-	-	-	-	-	-	-	-	-	-	-	-	-	-
SBOXATRBCS	1	1	-	-	-	-	-	-	-	-	-	-	-	-	-	-	-	-	-	1	-	-	-	-	-	-	-	-	-	-	-	-	-	-	-	-	-	-	-	-	-	-	-	-	-	-	-	-	-
SEBFCONSSTPR10A	-	-	2	-	-	1	-	-	3	-	-	-	-	-	2	1	-	1	1	-	-	-	-	1	-	-	-	-	-	-	1	3	-	-	-	-	2	2	-	1	-	-	-	-	1	-	1	-	1
SEF1MOTIF	-	1	-	-	-	-	-	-	-	-	-	-	-	-	-	-	-	-	-	1	-	-	1	-	-	-	-	-	-	-	-	-	-	-	-	-	-	1	-	-	-	-	-	-	2	1	1	-	2
SEF3MOTIFGM	-	1	-	-	-	1	3	-	2	-	-	1	-	-	1	-	1	-	-	-	-	-	1	-	1	-	2	-	-	-	-	1	1	1	1	-	-	1	1	-	1	1	5	1	1	2	1	-	1
SEF4MOTIFGM7S	1	1	3	5	2	3	-	3	1	-	-	2	4	2	-	3	-	-	1	6	-	-	-	2	4	3	3	1	1	-	1	2	-	-	-	-	3	3	2	2	-	1	10	-	2	2	1	5	5
SITEIIAOSPCNA	-	-	-	-	-	-	-	-	-	-	-	1	-	-	-	-	-	-	-	-	-	-	-	-	-	-	-	-	-	-	-	-	-	-	-	-	-	-	-	-	-	-	-	-	-	-	-	-	-
SITEIIATCYTC	1	2	1	2	1	2	2	7	2	2	1	1	3	1	2	2	3	1	1	2	1	1	1	-	4	-	1	-	4	3	4	-	-	2	3	2	1	2	2	1	2	-	6	3	-	-	-	-	-
SITEIOSPCNA	-	-	-	-	-	-	-	-	-	-	-	-	-	-	-	-	-	-	-	-	-	-	-	-	-	-	-	-	-	-	-	-	1	-	1	-	-	-	-	-	-	1	-	-	-	-	-	-	-
SORLIP1AT	4	6	7	4	10	5	5	2	5	3	4	2	2	2	5	2	4	5	5	8	2	2	2	3	5	3	3	4	3	3	3	2	1	1	1	3	3	4	7	5	2	3	2	6	1	-	-	-	2
SORLIP2AT	3	2	3	-	2	2	4	15	5	6	7	2	5	3	4	1	7	2	2	1	-	-	2	2	2	5	1	1	3	3	3	2	-	1	6	3	5	-	-	1	4	3	7	7	2	2	1	2	-
SORLIP3AT	-	-	-	-	-	-	-	-	-	-	-	-	-	-	-	-	-	-	-	-	-	-	-	-	-	-	-	-	-	-	-	-	-	-	-	-	-	-	-	-	-	-	-	-	-	-	-	-	-
SORLIP5AT	-	-	-	-	-	1	-	-	-	-	1	-	-	-	-	-	-	-	-	-	-	-	-	-	-	-	-	-	1	1	1	-	-	-	-	-	-	-	-	-	-	-	-	-	-	-	-	-	-
SORLREP2AT	-	-	-	-	-	-	-	-	-	-	-	-	-	1	-	-	-	-	-	-	-	-	-	-	-	-	-	-	-	-	-	-	-	-	-	-	-	-	-	-	-	-	-	-	-	-	-	-	-
SORLREP3AT	-	-	-	-	-	-	-	-	-	-	-	-	-	-	-	-	-	-	-	1	-	-	-	-	-	-	-	-	-	-	-	-	-	-	-	-	-	1	-	-	-	-	-	-	-	-	-	-	-
SORLREP4AT	-	-	-	-	-	-	-	-	-	-	-	-	-	-	-	-	-	-	-	-	-	-	-	-	-	-	-	-	1	1	1	-	-	-	-	-	-	-	-	-	-	-	-	-	-	-	-	-	-
SP8BFIBSP8AIB	-	-	-	-	-	-	-	-	-	-	-	-	-	-	-	-	-	-	-	-	-	-	-	-	1	-	-	-	-	-	-	-	-	-	-	-	-	-	-	-	-	-	-	-	-	-	-	-	-
SP8BFIBSP8BIB	1	-	-	1	-	-	-	-	-	-	-	-	-	-	-	-	-	-	-	-	-	1	1	1	-	-	-	-	1	-	-	-	1	-	-	-	-	-	1	-	-	-	-	-	-	-	-	-	1
SPHCOREZMC1	-	-	-	-	-	1	-	-	-	-	-	-	-	-	-	-	-	-	-	-	-	-	-	-	-	-	-	-	-	-	-	-	-	-	-	-	-	-	-	-	-	-	-	-	-	-	-	-	-
SREATMSD	1	1	-	-	-	-	-	1	-	-	-	-	1	-	1	1	1	-	-	1	2	1	2	-	1	-	-	-	2	2	2	-	4	2	3	-	1	1	-	1	-	-	-	1	-	-	-	2	1
SURE1STPAT21	-	-	-	-	-	1	-	-	-	-	-	-	-	-	-	-	-	-	-	-	-	-	-	1	-	-	-	-	-	-	-	-	1	1	1	-	-	1	-	2	-	-	-	-	-	-	-	-	-
SURE2STPAT21	-	-	-	-	1	-	-	-	-	-	-	-	-	-	-	-	-	-	-	-	-	-	-	-	-	-	-	-	-	-	-	-	-	-	-	-	-	-	-	-	-	-	-	-	-	-	-	-	-
SURECOREATSULTR11	1	4	1	2	3	2	3	4	7	3	3	1	8	2	3	2	2	2	4	2	2	3	3	3	2	5	4	3	3	3	6	5	4	1	2	3	3	7	4	4	1	2	2	5	3	4	2	4	2
SV40COREENHAN	1	1	2	-	-	-	1	-	1	-	-	-	-	-	1	1	-	-	1	-	-	-	1	-	-	-	-	-	2	-	1	-	1	1	1	-	1	-	1	1	-	-	-	-	-	-	-	-	-
T/GBOXATPIN2	2	-	-	-	2	-	-	-	-	1	1	1	1	1	2	-	-	-	-	-	1	-	1	-	1	-	1	-	-	-	-	-	2	1	2	1	1	2	1	1	-	1	1	-	1	-	1	-	-
TAAAGSTKST1	2	1	3	1	4	3	1	2	4	1	1	-	1	1	4	2	-	-	-	-	3	4	9	3	6	-	7	1	4	6	1	2	4	3	3	3	2	-	1	-	3	2	1	-	2	1	2	2	5
TATABOX2	-	-	-	-	-	1	1	4	-	-	-	-	-	-	-	-	-	-	-	-	1	1	1	1	-	1	1	-	-	-	-	1	-	-	-	-	-	-	-	-	-	-	1	-	1	-	-	-	6
TATABOX3	-	-	-	-	-	1	-	-	-	-	1	-	-	-	-	-	-	-	-	-	-	-	-	-	-	-	-	-	-	-	-	-	-	-	-	-	-	1	-	2	-	-	1	-	-	-	-	-	-
TATABOX4	-	-	-	1	1	4	-	5	-	-	-	2	-	-	1	-	-	-	-	-	-	-	-	-	-	-	-	-	-	-	-	-	-	-	-	-	-	-	-	-	-	-	-	-	2	2	2	1	2
TATABOX5	-	2	2	1	3	3	1	4	-	2	-	4	-	-	1	2	2	-	1	4	5	2	3	1	-	-	4	3	1	3	2	2	4	2	3	2	2	1	4	1	1	2	9	1	6	8	9	3	2
TATABOXOSPAL	-	-	-	-	-	-	1	-	-	-	-	-	-	1	1	-	-	-	-	1	-	-	1	1	-	1	1	1	-	-	-	-	-	-	-	-	-	1	1	1	-	-	-	-	-	1	1	2	-
TATAPVTRNALEU	-	-	-	-	-	-	-	1	-	-	-	-	-	-	-	-	-	-	-	-	-	-	-	-	-	-	-	-	-	-	-	-	-	-	-	-	-	-	-	-	-	-	-	-	1	-	-	-	1
TATCCACHVAL21	-	-	1	-	-	-	-	-	1	-	-	-	1	1	1	-	-	-	-	-	-	1	-	-	-	-	-	-	-	-	-	-	-	-	-	-	-	1	-	1	-	1	-	-	-	-	-	-	-
TATCCAOSAMY	-	-	2	1	-	-	-	1	2	1	1	2	2	2	2	1	2	-	-	-	2	1	2	-	2	-	-	-	-	-	-	1	-	-	1	2	2	2	-	1	-	1	-	-	-	-	-	2	1
TATCCAYMOTIFOSRAMY3D	-	-	2	1	-	-	-	-	1	1	-	-	2	2	2	1	-	-	-	-	-	1	1	-	1	-	-	-	-	-	-	-	-	-	-	-	-	2	-	1	-	1	-	-	-	-	-	-	1
TBOXATGAPB	1	1	1	1	3	5	1	1	3	-	-	2	-	1	2	1	1	-	-	2	-	-	-	1	1	-	1	2	2	-	-	-	-	-	-	-	1	-	-	2	-	1	-	-	1	2	2	1	1
TCA1MOTIF	-	-	-	-	-	-	-	-	-	-	-	-	-	-	-	-	-	-	-	-	-	-	-	-	-	-	-	-	1	1	1	-	-	-	-	-	-	-	-	-	-	-	-	-	-	-	-	-	-
TE2F2NTPCNA	-	-	-	-	-	-	-	-	-	-	-	-	-	-	-	-	-	-	-	-	-	-	1	-	-	-	-	-	-	-	-	-	-	-	-	-	-	-	-	-	-	-	-	-	-	-	-	-	-
TELOBOXATEEF1AA1	-	-	-	-	-	-	-	-	-	-	-	-	-	-	-	-	-	-	-	-	-	-	-	-	-	-	-	1	-	-	-	-	-	-	-	-	-	-	-	-	-	-	-	-	-	-	-	-	-
TGACGTVMA	-	-	-	-	-	-	-	-	-	-	-	-	-	-	-	-	-	-	-	-	-	-	-	-	-	-	-	-	-	-	-	-	-	-	-	-	-	-	-	-	-	-	-	-	-	-	-	-	-
TGACGTVMAMY	1	1	3	-	-	-	1	-	1	-	1	1	1	1	-	2	1	2	2	-	1	-	-	-	1	-	-	1	-	-	-	-	-	-	-	-	1	1	1	2	1	-	-	-	-	-	-	-	-
TGTCACACMCUCUMISIN	-	-	1	1	-	-	-	-	1	1	1	-	-	-	-	-	1	-	-	-	-	-	-	-	-	-	-	-	-	-	-	-	-	-	-	-	1	1	-	1	-	2	-	-	1	-	1	1	-
TL1ATSAR	-	1	-	-	-	-	-	-	-	-	-	-	-	-	-	-	-	-	-	-	-	-	-	-	-	-	-	-	-	-	1	-	-	-	-	-	-	-	-	-	-	-	-	-	-	-	-	-	-
TOPOISOM	-	-	-	-	-	-	-	-	-	-	-	-	-	-	-	-	-	-	-	-	-	-	-	-	-	-	-	-	-	-	-	-	-	-	-	-	-	-	-	-	-	-	-	-	-	-	-	-	-
UP1ATMSD	-	-	-	-	-	-	-	-	-	-	-	-	-	-	-	-	-	-	-	-	-	-	-	-	-	-	-	-	-	-	-	-	-	-	-	-	-	-	-	-	1	-	1	-	-	-	-	-	-
UP2ATMSD	-	-	-	-	-	-	-	-	-	-	-	-	-	-	-	-	1	1	1	-	-	-	-	1	-	1	-	2	-	-	-	-	-	-	-	-	-	-	-	-	-	-	-	1	-	-	-	-	-
UPRMOTIFIAT	-	-	1	-	-	-	1	-	-	-	-	-	-	-	-	-	-	2	2	-	-	-	-	-	-	-	-	-	-	-	-	-	-	-	-	-	-	1	1	1	-	-	-	-	-	-	-	-	-
UPRMOTIFIIAT	-	-	-	-	-	1	-	1	1	1	-	-	-	-	-	-	-	2	2	-	-	-	-	-	-	-	-	-	1	1	1	1	-	-	-	-	-	-	-	-	-	-	-	1	-	-	-	-	-
VSF1PVGRP18	-	-	-	1	-	-	-	-	-	-	-	-	-	-	-	-	-	-	-	-	-	-	-	-	-	-	-	-	-	-	-	-	-	-	-	-	-	-	-	-	-	-	-	-	-	-	-	-	-
WBBOXPCWRKY1	1	-	1	1	1	2	-	1	-	-	-	-	-	-	1	1	-	-	1	2	2	2	1	2	-	-	-	-	-	-	-	1	-	-	-	-	1	-	-	-	-	1	-	-	-	2	3	2	2
WBOXATNPR1	2	2	10	8	2	3	1	1	4	2	2	2	1	-	5	5	1	3	3	7	3	2	2	3	4	2	3	1	2	2	4	3	-	1	2	2	2	1	1	3	3	2	4	1	2	6	5	6	3
WBOXHVISO1	1	-	3	3	-	2	3	2	2	4	-	2	4	3	3	3	1	3	4	2	-	2	1	1	2	1	2	-	1	-	1	5	3	1	2	1	1	1	1	4	1	3	2	2	1	1	1	3	2
WBOXNTCHN48	-	-	-	2	-	2	-	2	3	6	1	3	2	1	-	2	3	1	1	-	-	1	1	-	1	-	-	-	-	-	-	2	-	1	-	-	1	1	-	1	-	-	-	2	-	-	-	1	-
WBOXNTERF3	2	1	6	7	1	5	3	4	3	9	3	5	5	3	5	8	5	3	4	3	2	6	4	5	4	2	4	-	2	2	2	8	4	3	4	1	5	3	1	5	2	5	2	6	2	3	3	4	3
WRECSAA01	-	-	-	-	-	-	-	-	-	-	-	1	-	-	-	-	1	-	-	-	-	-	-	-	-	-	-	-	-	-	-	-	-	-	-	-	-	-	-	-	-	-	-	-	1	-	-	-	-
WRKY71OS	6	8	18	15	4	7	7	6	10	12	7	7	9	7	13	16	9	8	8	12	8	10	8	10	6	8	7	3	5	4	6	14	6	5	8	4	12	9	3	14	10	9	7	8	6	8	9	14	6
WUSATAg	1	1	-	-	-	2	-	-	-	-	-	-	2	-	1	-	-	-	-	-	-	-	-	1	-	-	-	-	1	1	-	-	-	-	-	-	-	-	-	-	1	-	1	-	-	-	1	1	-
XYLAT	-	-	-	-	-	-	-	-	1	-	-	-	-	-	-	-	-	-	-	-	2	1	1	-	1	-	-	-	-	-	-	-	-	-	1	1	-	-	-	-	-	-	1	-	-	-	-	-	-
ZDNAFORMINGATCAB1	-	-	-	-	-	-	-	1	-	-	-	-	-	-	-	-	1	-	-	-	-	-	-	-	-	-	-	-	-	-	-	-	-	-	-	-	-	-	-	-	-	-	-	-	-	-	-	-	-
[truncated: 28 more columns]

## Sheet: Additional file 3
Additional file 3. Annotations of putative TdATGs cis-acting regulatory DNA elements identified in PLACE
Cis-element	Td4A_ATG1a	Td6A_ATG2a	Td6B_ATG2b	Td7A_ATG2c	Td1A_ATG3a	Td1B_ATG3b	Td2A_ATG4a	Td2B_ATG4b	Td6A_ATG5a	Td6B_ATG5b	Td3A_ATG6a	Td2A_ATG7a	Td3A_ATG7b	Td3B_ATG7c	Td1B_ATG8a	Td2A_ATG8b	Td2B_ATG8c	Td2B_ATG8d	Td5A_ATG8e	Td5B_ATG8f	Td6B_ATG8g	Td4A_ATG9a	Td4B_ATG9b	Td2A_ATG10a	Td2B_ATG10b	Td6A_ATG11a	Td6B_ATG11b	Td6A_ATG12a	Td6B_ATG12b	Td7B_ATG12c	Td2A_ATG13a	Td2B_ATG13b	Td4A_ATG13c	Td4B_ATG13d	Td6A_ATG13e	Td6B_ATG13f	Td1A_ATG14a	Td2A_ATG14b	Td5A_ATG14c	Td5A_ATG16a	Td1A_ATG18a	Td1B_ATG18b	Td3A_ATG18c	Td3B_ATG18d	Td6B_ATG18e	Td3A_ATG22a	Td3B_ATG22b	Td4A_ATG27a	Td4B_ATG27b
-10PEHVPSBD	-	-	-	-	-	-	1	1	-	1	2	3	-	-	1	-	-	-	-	-	-	-	-	1	1	-	-	1	-	-	1	1	1	1	-	-	-	2	-	1	1	-	1	-	-	2	-	1	-
-300CORE	1	-	-	-	-	-	-	-	1	-	-	-	-	-	-	-	-	-	-	-	-	1	-	1	-	-	-	-	-	-	-	-	-	-	-	-	-	-	-	-	-	-	-	-	-	-	-	-	-
-300ELEMENT	4	1	2	2	1	-	-	-	1	1	1	2	1	4	1	3	1	2	1	1	1	3	-	2	2	-	1	1	-	1	-	1	-	-	1	-	-	3	-	-	-	-	1	-	1	1	-	-	1
-300MOTIFZMZEIN	-	-	-	-	-	-	-	-	-	1	-	-	-	-	-	-	-	-	-	-	-	1	-	-	-	-	-	-	-	-	-	-	-	-	-	-	-	-	-	-	-	-	-	-	-	-	-	-	-
2SSEEDPROTBANAPA	1	1	-	-	1	-	1	-	-	-	1	-	-	-	1	2	-	1	-	-	-	1	1	1	1	-	-	1	-	1	-	1	2	1	-	1	-	-	2	-	-	-	1	-	2	-	-	-	-
5659BOXLELAT5659	-	-	-	-	-	-	-	-	-	-	-	-	-	-	-	-	-	-	-	-	-	-	-	-	-	1	-	-	-	-	-	-	-	-	-	-	-	-	-	-	-	-	-	-	-	-	-	-	-
AACACOREOSGLUB1	1	1	-	-	-	1	-	-	-	-	-	-	1	1	-	3	1	3	-	-	-	-	-	-	-	-	-	1	-	-	1	-	-	-	-	-	1	-	2	-	-	-	-	1	1	-	-	-	-
ABREATCONSENSUS	-	-	-	-	-	-	-	-	-	-	-	-	1	-	-	-	-	-	-	-	-	-	1	-	-	1	1	-	-	1	-	-	-	-	-	-	1	-	-	-	-	-	-	1	-	-	1	-	-
ABREATRD22	-	-	-	-	-	-	-	-	-	-	-	-	-	-	-	-	-	-	-	-	-	-	-	-	-	1	1	-	-	-	-	-	-	-	-	-	1	-	-	-	-	-	-	-	-	-	1	-	-
ABREAZMRAB28	-	-	-	-	-	-	-	-	-	-	-	-	-	-	-	-	-	-	-	-	-	-	-	-	-	-	-	-	-	-	-	-	-	-	-	-	-	-	-	-	-	-	-	1	-	-	-	-	-
ABRECE1HVA22	-	-	-	-	-	-	-	-	-	-	-	-	-	-	-	-	-	-	-	-	1	-	-	-	-	-	-	-	-	-	-	-	-	-	-	-	-	-	-	-	-	-	-	-	-	-	-	-	-
ABRELATERD1	4	1	-	8	3	3	3	2	3	2	2	1	2	2	5	-	3	3	1	-	-	4	2	3	1	5	4	-	1	3	2	2	1	1	3	7	5	6	4	3	5	3	4	3	1	1	4	5	4
ABREMOTIFAOSOSEM	-	-	-	-	-	1	-	-	-	-	-	1	-	-	-	-	-	-	-	-	-	-	-	-	-	-	-	-	-	-	-	-	-	-	-	-	-	-	-	-	-	-	-	-	-	-	-	1	1
ABREOSRAB21	-	-	-	-	-	-	-	-	1	-	-	-	1	-	-	-	3	-	-	-	-	-	1	1	-	-	-	-	-	1	-	-	-	-	-	1	-	1	1	-	2	2	-	1	-	-	1	1	-
ABRERATCAL	2	1	2	7	2	4	2	2	1	2	-	-	2	1	3	-	1	3	-	-	-	4	2	1	1	3	2	-	1	1	-	-	1	1	2	7	4	2	4	4	4	1	2	2	1	-	3	3	4
ABREZMRAB28	-	-	-	-	-	-	-	-	-	-	-	-	-	-	-	-	-	-	-	-	-	-	-	-	-	-	-	-	-	-	-	-	-	-	-	-	-	-	-	-	-	-	-	2	-	-	-	-	-
ACGTABOX	-	-	-	-	2	-	2	-	2	-	-	-	-	-	-	-	2	2	-	-	-	-	-	-	-	-	-	-	-	-	-	2	-	-	-	-	2	-	-	-	-	-	-	-	-	-	-	-	-
ACGTABREMOTIFA2OSEM	1	1	-	-	2	1	-	-	1	-	1	1	1	-	-	-	-	1	-	-	-	-	2	1	-	2	2	-	-	2	-	-	-	-	-	-	1	1	-	-	1	-	-	1	-	1	2	1	2
ACGTABREMOTIFAOSOSEM	-	-	-	-	-	1	-	-	-	-	-	1	-	-	-	-	-	-	-	-	-	-	-	-	-	-	-	-	-	-	-	-	-	-	-	-	-	-	-	-	-	-	-	-	-	-	-	1	1
ACGTATERD1	8	2	4	16	10	8	8	4	12	6	6	2	10	8	10	-	12	14	4	2	-	6	6	6	8	8	8	4	2	12	4	6	4	4	8	14	10	8	14	4	10	8	10	10	4	6	12	14	6
ACGTCBOX	-	-	-	-	-	-	-	-	-	-	2	-	2	-	-	-	-	-	-	-	-	-	2	-	-	-	-	-	-	2	-	-	-	-	-	-	-	-	-	-	-	-	-	2	-	2	4	-	-
ACGTOSGLUB1	-	-	-	1	-	-	-	-	-	-	1	-	-	-	-	-	1	-	-	-	-	-	-	-	-	-	-	-	-	-	-	1	-	-	1	-	-	-	-	-	-	-	1	-	-	-	-	1	1
ACGTTBOX	-	-	-	-	-	-	-	-	-	2	-	-	-	-	-	-	-	-	-	2	-	-	-	-	-	-	-	-	-	-	-	-	-	-	-	-	-	-	-	-	-	2	2	-	-	-	2	2	-
ACIIIPVPAL2	-	-	-	-	-	-	-	-	-	-	-	-	-	-	-	-	-	1	-	-	-	-	-	-	-	-	-	-	-	-	-	-	-	-	-	-	-	-	-	-	-	-	-	-	-	-	-	-	-
AGATCONSENSUS	-	-	-	-	-	-	-	-	-	-	-	-	-	-	-	-	-	-	-	-	-	-	-	-	-	-	-	-	1	-	-	-	-	-	-	-	-	-	-	-	-	-	-	-	-	-	-	-	-
AGCBOXNPGLB	-	1	2	-	-	-	-	1	-	-	1	-	-	-	-	-	-	-	2	2	1	1	1	-	1	1	1	-	-	2	-	-	-	-	-	-	1	-	-	-	2	-	-	-	-	-	1	1	1
AGL2ATCONSENSUS	-	-	-	-	-	-	-	-	-	-	-	-	-	-	-	-	-	-	-	-	-	-	-	-	-	-	-	-	1	-	-	-	-	-	-	-	-	-	-	-	-	-	-	-	-	-	-	-	-
AGMOTIFNTMYB2	-	-	-	-	-	-	-	-	1	-	-	-	1	-	1	-	-	-	-	-	-	-	-	-	-	-	-	-	-	-	-	-	-	-	-	1	-	-	-	-	-	-	-	-	-	-	-	-	-
AMMORESIIUDCRNIA1	-	-	-	-	-	-	1	-	-	-	-	-	-	-	-	-	-	2	-	-	-	-	-	-	-	-	-	-	-	1	-	-	-	-	-	-	-	1	-	-	-	-	1	-	3	-	-	-	-
AMMORESIVDCRNIA1	-	1	1	-	-	-	1	-	1	-	-	-	-	-	-	1	2	-	-	-	-	-	-	-	-	1	1	-	-	1	-	-	-	-	-	-	-	1	-	-	-	-	1	-	2	-	-	-	-
AMMORESVDCRNIA1	-	-	-	-	-	-	-	-	-	-	-	-	-	-	-	-	-	-	-	-	-	-	-	-	-	-	-	-	-	-	-	-	-	-	-	-	-	-	-	-	-	-	-	-	-	-	1	-	-
AMYBOX1	-	2	-	-	1	1	1	-	1	1	-	-	1	2	-	-	-	-	-	-	-	-	-	1	-	1	-	-	-	1	-	-	1	2	-	-	-	2	1	-	-	-	-	-	1	-	-	-	-
AMYBOX2	-	1	1	-	-	-	1	1	1	-	-	-	1	-	-	-	-	-	-	-	-	1	-	-	-	1	-	-	-	-	-	-	-	1	-	-	-	-	1	-	-	-	4	-	-	1	-	-	-
ANAERO1CONSENSUS	2	-	3	1	-	1	-	-	2	3	1	1	1	-	-	4	1	5	-	1	1	-	-	3	-	-	-	1	-	-	2	2	1	2	-	-	3	-	2	-	-	-	-	2	-	-	-	-	-
ANAERO2CONSENSUS	1	1	-	1	-	1	2	3	-	3	-	1	1	-	-	-	1	2	3	2	-	-	1	-	1	-	-	3	1	-	-	-	-	-	3	2	3	1	1	2	2	2	2	-	1	-	3	1	2
ANAERO3CONSENSUS	1	-	-	-	-	-	-	-	-	-	-	-	-	-	1	-	-	-	-	-	-	1	-	1	-	-	-	-	-	-	3	-	-	-	1	1	-	-	-	-	-	-	-	-	-	-	-	-	-
ANAERO4CONSENSUS	1	-	-	-	-	-	-	-	1	-	-	-	-	-	-	-	-	-	-	-	-	-	-	-	-	-	-	-	-	-	-	-	-	-	-	-	-	-	-	-	-	-	-	-	-	-	-	-	-
ANAERO5CONSENSUS	-	-	-	-	-	-	-	-	-	-	-	-	-	-	-	-	-	-	-	-	-	-	-	-	-	-	-	-	2	-	-	-	-	-	-	-	-	-	-	-	-	-	-	-	-	-	-	-	-
ARE1	-	-	-	-	-	-	-	-	-	-	1	-	-	-	-	-	-	-	-	-	-	-	-	-	-	-	-	-	-	-	-	-	-	-	-	-	-	-	-	-	-	1	-	-	-	-	-	-	1
ARFAT	1	-	-	1	-	1	1	1	-	-	-	-	-	-	1	-	1	-	-	-	1	-	2	-	1	1	-	1	-	-	-	-	4	1	2	1	2	-	1	-	-	-	2	1	1	1	1	1	1
ARR1AT	9	11	10	10	12	9	9	7	18	20	8	11	13	13	15	11	5	11	9	7	15	14	11	10	12	19	18	19	3	10	13	10	12	13	12	14	4	11	20	6	9	11	7	11	12	10	10	10	6
ASF1MOTIFCAMV	3	3	2	1	1	1	-	-	2	-	2	1	2	1	1	2	5	2	1	-	3	1	2	2	4	4	3	1	-	2	1	3	-	-	1	2	4	2	1	1	2	2	3	2	1	2	4	1	1
AUXREPSIAA4	-	-	-	-	-	-	-	-	-	-	-	-	-	-	-	-	-	-	-	-	-	-	-	-	-	-	-	-	-	1	-	-	-	-	-	-	-	-	-	-	-	-	-	-	-	-	-	-	-
AUXRETGA1GMGH3	-	-	-	-	-	-	-	-	-	-	-	-	-	-	-	-	-	-	-	-	-	-	-	-	-	-	-	-	-	-	-	-	-	-	-	-	-	-	-	-	-	-	-	-	-	-	-	-	-
AUXRETGA2GMGH3	-	1	-	-	1	-	-	-	-	-	1	-	-	-	-	-	-	-	-	-	-	-	-	-	-	-	1	-	-	-	-	-	-	-	-	-	-	-	-	-	-	-	-	-	-	-	-	-	-
BIHD1OS	1	8	6	2	3	3	3	2	1	4	1	6	5	3	5	3	2	1	1	1	4	2	3	2	4	-	-	4	3	-	3	2	8	3	-	3	4	3	-	3	-	5	1	2	1	5	2	5	3
BOXCPSAS1	-	-	-	1	2	-	-	1	-	1	-	-	1	-	2	-	-	-	-	-	-	1	-	1	1	1	1	-	2	-	1	-	-	1	-	-	-	2	-	1	-	1	-	-	-	-	-	-	-
BOXIINTPATPB	1	1	-	-	-	-	-	-	-	-	2	2	-	2	-	3	-	2	-	-	-	1	-	-	-	1	-	1	-	-	-	-	-	-	-	-	-	1	-	2	1	-	1	-	-	1	1	-	-
BOXIIPCCHS	-	1	-	-	1	-	-	-	1	-	1	-	1	-	-	-	-	1	-	-	-	-	1	1	-	1	2	-	-	2	-	-	-	-	-	-	1	1	-	-	-	-	-	1	-	1	2	-	-
BOXLCOREDCPAL	1	1	2	1	-	1	3	2	2	2	1	1	1	-	1	-	-	-	-	-	2	-	1	-	-	1	1	1	-	1	-	2	-	-	2	2	-	-	-	1	1	1	-	1	1	-	1	2	1
BP5OSWX	-	-	-	1	-	-	1	-	-	-	-	-	1	-	-	-	-	-	-	-	-	-	-	-	1	-	-	-	1	-	-	-	-	-	-	2	-	-	-	-	1	-	-	-	-	-	1	-	-
BS1EGCCR	1	-	-	-	1	-	-	1	1	1	-	-	-	-	-	-	1	-	-	-	3	-	-	1	-	-	-	1	-	-	-	2	-	-	1	2	3	-	-	2	1	1	3	1	-	1	-	2	2
CAATBOX1	9	15	11	3	12	7	15	11	14	21	16	22	14	20	15	20	6	18	15	12	12	18	6	13	10	18	14	12	5	5	9	7	11	11	9	15	4	6	4	12	4	8	6	9	6	8	12	12	3
CAATBOX2	-	-	-	-	-	-	-	-	-	-	-	-	-	-	-	-	-	-	-	1	-	-	-	-	-	-	-	-	-	-	-	-	-	-	-	-	-	-	-	-	-	-	-	-	-	-	-	-	-
CACGCAATGMGH3	-	-	-	-	-	-	-	-	-	-	-	-	-	-	-	1	-	-	-	-	-	-	-	-	-	-	-	-	-	-	-	-	-	-	-	-	-	-	-	-	-	-	-	-	-	-	-	-	-
CACGTGMOTIF	-	-	-	2	2	2	-	-	-	2	-	-	-	-	4	-	2	2	-	-	-	2	2	-	-	2	2	-	-	-	-	-	-	-	-	2	2	4	2	2	-	-	-	2	-	-	2	2	2
CACTFTPPCA1	14	16	19	14	13	19	13	14	10	22	22	33	18	13	10	22	11	12	23	19	15	15	6	17	18	10	11	22	9	14	25	8	21	24	20	25	13	21	14	10	12	11	15	22	13	22	8	11	7
CANBNNAPA	3	2	2	1	1	-	2	1	-	-	1	2	2	1	1	2	-	1	-	-	-	2	2	1	1	-	-	1	2	3	-	1	2	1	1	2	-	2	2	2	-	-	1	3	2	-	1	-	-
CAREOSREP1	-	-	2	7	-	-	-	1	3	-	-	-	3	1	1	1	1	2	-	-	1	1	3	1	1	1	1	1	-	-	3	2	2	3	2	1	1	-	1	1	1	1	-	1	1	2	2	-	-
CARGATCONSENSUS	-	-	-	-	-	-	-	-	-	-	-	-	-	-	-	-	-	-	-	-	-	2	-	-	-	-	-	-	2	-	-	-	-	-	-	-	-	-	-	-	-	-	-	-	-	-	-	-	-
CARGCW8GAT	-	-	-	-	2	6	-	-	2	4	-	2	4	2	2	2	-	4	-	-	-	-	-	-	2	4	-	2	-	2	2	2	8	4	-	2	2	-	2	-	-	-	2	-	-	2	-	-	-
CATATGGMSAUR	-	2	-	-	2	-	-	-	6	4	-	-	-	-	-	-	2	2	2	2	-	4	-	-	-	-	-	2	-	2	-	-	-	6	-	-	-	-	-	-	-	-	-	2	2	-	-	-	-
CBFHV	1	-	2	-	-	8	-	5	3	2	5	1	3	1	4	-	5	1	1	1	3	2	3	2	5	2	2	2	1	8	2	1	-	2	4	-	12	7	2	4	4	4	3	-	-	5	7	2	-
CCA1ATLHCB1	-	-	3	-	-	-	-	-	1	-	-	1	-	-	1	-	-	-	-	-	-	-	-	-	-	1	2	1	-	-	1	1	-	-	-	-	-	1	-	-	-	-	1	-	-	-	-	-	-
CCAATBOX1	-	2	-	-	1	-	3	3	2	3	4	1	4	4	3	4	-	4	5	6	2	8	2	1	4	6	5	3	-	2	1	3	6	3	5	6	2	-	1	3	1	1	2	2	-	1	3	3	1
CDA1ATCAB2	-	1	-	-	-	1	-	-	-	-	-	-	-	-	-	-	-	-	-	-	-	-	-	-	-	-	-	-	1	-	-	-	-	-	-	-	-	-	-	-	-	-	-	-	-	-	-	-	-
CELLCYCLESC	-	-	-	-	-	2	-	-	-	-	-	-	-	-	-	-	-	-	-	-	-	-	-	-	-	-	-	-	-	1	-	-	-	-	-	-	-	-	-	-	-	-	-	-	-	-	-	-	-
CEREGLUBOX1PSLEGA	-	-	-	-	-	-	-	-	-	1	-	-	-	-	-	1	-	-	-	-	-	-	-	-	-	-	-	-	-	-	-	-	-	-	-	-	-	-	-	-	-	-	-	-	-	-	-	-	-
CEREGLUBOX2PSLEGA	-	1	-	-	-	-	-	-	-	1	-	-	-	-	-	-	-	-	-	-	-	-	-	-	-	-	-	-	-	-	-	-	-	1	-	-	-	-	-	-	-	-	-	-	-	-	-	-	-
CGACGOSAMY3	6	5	4	-	1	2	1	3	3	1	6	-	5	1	2	-	15	-	4	4	-	-	7	4	4	1	2	1	2	7	2	1	-	4	2	-	8	4	3	7	4	5	4	3	3	4	14	9	3
CGCGBOXAT	-	2	10	12	-	8	6	22	8	-	15	-	6	4	2	-	16	2	6	6	2	12	4	9	8	12	10	4	8	14	6	18	2	4	20	14	34	4	16	18	20	16	16	4	4	-	10	6	18
CIACADIANLELHC	-	-	-	-	1	-	1	-	2	1	1	-	3	2	-	-	1	3	2	1	3	1	-	3	-	-	1	1	1	1	2	-	1	2	3	2	-	1	-	1	2	1	1	3	2	1	-	1	-
CMSRE1IBSPOA	1	1	1	-	-	-	1	-	-	-	-	-	-	-	-	-	-	-	-	-	-	-	-	1	-	-	-	-	-	-	-	-	-	-	1	-	-	-	1	1	-	1	3	-	2	-	1	-	-
CPBCSPOR	-	-	1	-	-	2	-	-	-	1	2	2	1	-	-	3	1	1	-	-	-	-	-	-	1	-	-	-	1	1	1	-	-	-	-	-	-	-	-	-	-	-	-	-	-	-	-	-	-
CPRFPCCHS	-	-	-	-	-	-	-	-	-	-	-	-	-	-	-	-	-	-	-	-	-	-	-	-	-	-	-	-	-	-	-	-	-	-	-	-	-	-	-	-	-	-	-	1	-	-	-	-	-
CRTDREHVCBF2	-	-	-	-	-	-	-	-	-	2	4	-	-	-	-	-	2	-	-	-	-	-	2	-	2	-	-	-	-	4	-	-	-	2	2	-	4	2	-	-	-	-	-	-	-	-	-	-	-
CTRMCAMV35S	-	-	1	-	-	-	-	6	-	-	-	-	-	-	-	-	-	-	2	-	1	-	1	-	-	-	1	-	-	-	-	-	-	-	1	16	-	1	-	-	5	1	-	-	-	-	-	1	1
CURECORECR	4	12	16	10	2	12	12	8	-	4	10	10	10	2	2	10	12	8	6	6	4	8	10	8	-	8	10	6	4	4	12	12	8	6	6	10	6	8	8	2	4	8	10	12	2	4	4	6	2
D1GMAUX28	-	-	-	-	-	-	-	-	-	-	-	-	-	-	-	-	-	-	-	-	-	-	-	-	-	-	-	-	-	-	-	-	-	-	-	-	-	-	-	-	-	-	-	-	-	-	-	-	-
DOFCOREZM	16	11	11	15	16	21	3	6	13	23	13	18	15	27	10	28	3	29	15	17	18	16	7	14	23	13	15	12	9	6	13	9	27	21	14	14	6	27	7	9	7	8	10	12	13	8	9	11	5
DPBFCOREDCDC3	4	3	-	14	3	-	5	4	3	3	-	-	2	5	4	1	4	1	1	1	3	3	5	2	3	1	-	4	4	3	1	1	6	5	1	2	1	6	4	2	3	2	3	4	2	4	6	3	2
DRE2COREZMRAB17	-	-	-	-	-	2	-	-	-	-	1	-	1	-	3	-	1	1	-	-	2	1	1	-	1	-	-	-	-	1	1	-	-	-	-	-	6	1	-	1	1	2	-	-	-	1	4	1	-
DRECRTCOREAT	-	-	1	-	-	6	-	4	-	-	1	-	2	-	3	-	2	1	1	1	2	2	1	2	2	1	1	1	1	3	1	-	-	-	1	-	8	3	2	3	4	3	-	-	-	3	5	2	-
E2F1OSPCNA	-	-	-	-	-	-	-	-	-	-	-	-	-	-	-	-	-	-	-	-	-	-	-	-	-	-	-	-	-	-	-	-	-	-	-	-	-	-	-	-	-	-	-	-	-	-	-	-	1
E2FANTRNR	-	-	-	-	-	-	-	-	-	-	-	-	-	-	-	-	-	-	-	-	-	-	-	-	-	-	-	-	-	-	-	-	-	-	-	-	-	-	-	-	-	-	-	-	-	-	-	-	1
E2FAT	-	-	-	-	-	-	-	-	-	-	-	-	-	-	-	-	-	-	-	-	-	-	-	-	-	-	-	-	-	-	-	-	-	-	-	-	-	-	-	-	-	-	-	-	-	-	-	-	-
E2FBNTRNR	-	-	-	-	-	-	-	-	-	-	-	-	-	-	-	-	-	-	-	-	-	-	-	-	-	-	-	-	-	2	-	-	-	-	-	-	-	-	-	-	-	-	-	-	-	-	-	-	1
E2FCONSENSUS	-	-	2	1	-	1	-	2	-	-	1	-	1	-	1	2	4	1	-	1	2	1	2	2	1	1	1	-	1	2	1	1	1	1	1	-	1	1	3	2	2	2	3	-	2	3	3	1	2
EBOXBNNAPA	12	26	10	44	22	2	16	14	14	22	10	8	12	22	14	6	10	16	10	6	10	30	10	12	8	6	2	10	14	6	10	10	10	16	8	10	6	12	10	20	2	-	14	18	16	14	10	8	8
EECCRCAH1	1	3	-	6	1	-	2	3	1	3	2	-	4	4	1	4	1	1	3	4	-	3	1	4	2	3	5	4	-	1	5	2	1	3	6	2	-	4	4	1	1	1	1	4	6	4	3	2	-
ELRECOREPCRP1	1	2	2	1	1	2	-	-	-	1	1	-	2	2	1	2	-	1	-	-	1	-	-	-	1	-	-	-	1	1	1	1	-	1	-	-	-	-	-	2	1	-	-	1	3	-	1	1	-
ELRENTCHN50	-	-	-	-	-	-	-	-	-	1	-	-	-	-	-	-	-	-	-	-	-	-	-	-	-	-	-	-	-	-	-	-	-	-	-	-	-	-	-	-	-	-	-	-	-	-	-	-	-
EMBP1TAEM	-	-	-	-	-	-	-	-	-	-	-	-	-	-	-	-	-	-	-	-	-	-	1	-	-	1	1	-	-	-	-	-	-	-	-	-	1	-	-	-	-	-	-	1	-	-	1	-	-
EMHVCHORD	-	-	-	-	-	-	-	-	-	-	-	-	-	-	-	-	-	-	-	-	-	-	-	1	-	-	-	-	-	-	-	-	-	-	-	-	-	-	-	-	-	-	-	-	-	-	-	-	-
ERELEE4	-	-	-	-	1	1	1	1	1	1	1	-	-	1	-	-	-	-	-	-	-	-	-	-	-	3	-	1	1	-	-	-	1	1	1	-	-	-	-	-	-	-	1	-	-	1	-	-	1
EVENINGAT	-	-	1	-	-	-	-	-	-	-	-	1	-	-	-	-	-	-	-	-	-	-	-	-	-	-	-	-	-	1	-	-	-	-	-	-	-	-	-	-	-	-	-	-	-	-	-	-	-
GADOWNAT	1	-	-	-	1	1	-	-	-	-	-	1	-	-	-	-	-	-	-	-	-	-	1	-	-	1	-	-	-	-	-	-	-	-	-	-	-	-	-	-	1	-	-	-	-	-	-	1	2
GAGA8HVBKN3	-	-	-	-	-	-	-	2	-	-	-	-	-	-	-	-	-	-	-	-	-	-	-	-	-	-	-	-	-	-	-	-	-	-	-	11	-	-	-	-	1	-	-	-	-	-	-	-	-
GAGAGMGSA1	-	-	-	-	-	-	-	1	-	-	-	-	-	-	-	-	-	-	-	-	-	-	-	-	-	-	-	-	-	-	-	-	-	-	-	10	-	-	-	-	-	-	-	-	-	-	-	-	-
GARE1OSREP1	-	1	-	-	-	-	-	-	1	-	-	-	-	1	-	-	-	-	-	-	-	-	-	1	-	-	-	-	-	1	-	-	-	-	-	-	-	2	-	-	-	-	-	-	-	-	-	-	-
GARE2OSREP1	-	-	-	-	-	-	-	-	-	-	-	-	-	-	-	-	-	1	-	-	-	-	-	-	-	-	-	-	-	-	-	-	-	-	-	-	-	-	2	-	-	-	-	-	-	-	-	-	-
GAREAT	1	2	-	-	1	1	1	-	1	1	-	-	1	1	-	-	-	1	-	-	-	-	-	-	-	1	-	1	-	-	-	-	2	2	-	-	-	-	1	-	1	1	-	-	1	1	-	1	-
GATABOX	5	7	10	5	11	5	4	3	9	17	6	25	9	10	19	7	3	5	8	10	7	7	4	7	10	7	6	12	2	6	13	4	11	17	10	9	4	10	4	4	14	7	10	14	8	8	1	6	-
GBOX10NT	-	-	-	-	-	-	-	-	-	-	-	-	-	-	-	-	-	-	-	-	-	-	-	-	-	-	-	-	-	-	-	-	-	-	-	-	1	-	-	-	-	-	-	-	-	-	1	-	-
GBOXLERBCS	-	-	-	-	-	-	-	-	-	-	-	-	-	-	-	-	-	-	-	-	-	-	1	-	-	-	-	-	-	-	-	-	-	-	-	-	-	-	-	-	-	-	-	1	-	-	-	-	-
GCAACREPEATZMZEIN	-	-	-	-	-	-	-	-	-	-	-	-	-	-	-	-	-	-	-	-	-	-	-	-	-	-	-	-	-	-	-	-	-	-	-	-	-	-	-	-	-	-	-	-	-	-	-	-	-
GCBP2ZMGAPC4	-	-	-	-	-	-	1	1	-	-	-	-	-	-	-	-	-	-	-	-	-	-	-	-	-	-	-	-	-	-	-	-	-	-	-	-	-	-	-	-	-	-	-	-	-	-	-	-	-
GCCCORE	1	4	3	1	-	-	2	3	8	-	5	-	2	-	1	-	17	-	9	8	4	1	5	1	2	4	4	-	-	5	-	9	-	1	-	-	10	3	7	6	6	4	2	-	4	-	3	3	5
GCN4OSGLUB1	-	-	-	-	1	-	-	-	-	2	-	-	-	-	-	-	-	-	-	-	-	1	-	-	-	-	-	-	-	-	-	-	-	-	-	1	-	-	1	-	-	-	-	-	-	-	-	-	-
GGTCCCATGMSAUR	-	-	-	-	-	-	-	-	-	-	-	-	-	-	-	-	-	-	-	-	-	-	-	-	-	-	-	-	-	-	-	-	-	-	-	-	-	-	-	-	-	-	-	-	-	-	-	-	-
GLMHVCHORD	-	-	-	-	-	-	-	-	-	2	-	-	-	-	-	-	-	-	-	-	-	1	-	-	-	-	-	-	-	-	-	-	-	-	-	-	-	-	-	-	-	-	-	-	-	-	-	-	-
GT1CONSENSUS	8	8	13	8	4	9	2	2	10	8	8	18	8	9	5	15	1	6	7	7	1	16	4	9	12	14	10	16	11	3	9	2	24	14	6	7	4	10	7	4	5	3	5	7	9	7	6	5	2
GT1CORE	-	-	-	-	-	3	2	1	2	2	-	-	1	-	1	1	-	-	-	1	3	-	1	-	-	-	-	1	-	-	-	-	-	1	-	2	-	1	1	1	-	-	-	-	-	-	-	-	-
GT1GMSCAM4	2	3	5	3	-	4	2	-	7	1	1	2	1	2	-	7	-	2	1	1	-	3	-	2	2	4	3	2	3	1	1	1	7	4	1	1	1	4	2	-	3	1	3	-	1	2	-	1	1
GT1MOTIFPSRBCS	-	-	-	-	-	-	-	-	-	-	-	-	1	-	-	-	-	-	-	-	-	-	-	1	-	-	-	-	-	-	-	-	-	-	-	-	-	-	-	-	-	-	-	-	1	-	-	-	-
GTGANTG10	6	9	9	4	8	7	4	10	9	6	8	14	5	7	6	10	6	6	8	6	10	11	7	10	10	8	7	7	6	5	12	8	5	8	10	9	13	11	7	5	4	5	13	11	8	14	11	6	7
HBOXCONSENSUSPVCHS	-	-	-	-	-	-	-	-	-	-	-	-	-	-	-	-	-	-	-	-	-	-	-	-	-	-	-	-	-	-	-	-	-	-	-	-	-	-	-	-	-	-	-	-	-	-	-	-	-
HDZIP2ATATHB2	-	-	-	-	-	-	-	-	-	-	-	-	-	-	-	-	-	1	-	-	-	-	-	-	-	-	-	-	-	-	-	-	-	1	-	-	-	-	-	-	-	-	-	-	-	-	-	-	-
HEXAMERATH4	4	1	1	-	-	1	-	-	-	-	1	-	-	-	-	-	3	-	-	-	-	-	1	-	2	-	-	1	1	2	1	-	-	1	-	-	3	1	-	1	1	1	3	-	2	1	7	2	2
HEXAT	-	1	-	-	1	-	-	-	-	-	1	-	-	-	-	-	-	-	-	-	-	-	-	-	-	1	1	-	-	-	-	-	-	-	-	-	-	-	-	-	-	-	-	-	-	-	-	-	-
HEXMOTIFTAH3H4	1	1	-	-	1	-	-	-	1	-	1	-	1	-	1	-	-	-	-	-	-	-	1	-	1	1	1	1	-	-	-	-	-	-	-	1	-	-	-	-	-	-	-	1	-	-	-	1	-
HSELIKENTACIDICPR1	-	-	-	-	-	-	-	-	-	-	-	-	-	-	-	-	-	-	-	-	-	-	-	-	-	-	-	-	-	-	-	-	-	-	-	-	-	-	-	-	-	-	-	-	-	-	-	-	-
IBOX	-	-	-	-	-	-	-	-	-	1	3	1	-	-	-	-	-	-	-	1	-	2	-	1	-	-	-	-	-	-	-	-	-	2	2	3	-	-	-	-	2	1	1	2	-	-	-	-	-
IBOXCORE	1	1	3	2	3	1	-	1	-	5	3	8	3	5	8	3	1	2	2	3	1	5	2	2	2	1	-	5	-	2	4	2	6	6	3	4	1	1	1	1	3	2	3	4	-	2	-	2	-
IBOXCORENT	-	-	-	-	-	-	-	-	-	1	-	1	-	-	-	-	-	-	-	-	-	1	-	-	-	-	-	-	-	-	-	-	-	2	2	2	-	-	-	-	-	1	-	1	-	-	-	-	-
INRNTPSADB	-	-	-	-	2	3	3	2	1	2	3	6	2	3	1	1	1	3	3	3	-	4	-	3	2	3	1	2	1	3	3	1	2	4	1	3	1	3	2	-	-	-	1	1	2	3	1	1	2
INTRONLOWER	-	2	2	1	2	2	1	1	-	-	-	-	-	1	-	-	-	-	-	-	-	-	-	2	-	-	-	2	-	1	-	-	-	-	-	-	2	3	3	1	2	1	3	-	-	-	1	-	2
IRO2OS	-	-	-	-	1	1	-	-	-	-	-	-	-	-	1	-	-	-	-	-	-	-	1	-	-	1	1	-	-	-	-	-	-	-	-	-	1	-	1	1	-	-	-	2	-	-	1	1	1
L1BOXATPDF1	-	-	-	-	-	-	-	-	-	-	1	-	-	-	-	1	-	-	-	-	-	-	-	-	-	-	-	-	-	1	-	-	-	1	-	-	-	-	-	-	-	-	-	-	-	-	-	-	-
LBOXLERBCS	-	-	-	-	-	-	-	-	-	-	-	-	-	-	-	-	-	-	-	-	-	-	-	-	-	-	-	-	-	-	-	-	-	-	-	-	-	-	-	-	-	-	-	-	-	-	-	-	-
LEAFYATAG	-	-	-	-	-	-	-	1	-	-	-	-	-	1	-	-	-	-	-	-	-	-	-	-	-	-	-	-	-	-	-	1	4	-	-	-	1	-	-	-	-	-	-	1	-	-	-	-	-
LECPLEACS2	-	-	1	1	-	-	-	-	-	-	-	2	-	-	-	-	-	1	-	-	-	-	-	-	-	-	-	-	-	1	1	1	2	-	-	-	-	-	-	-	-	-	-	-	-	1	-	-	-
LRENPCABE	-	-	-	-	-	-	-	-	-	-	-	-	-	-	-	-	-	-	-	-	-	-	-	-	-	-	-	-	-	1	-	-	-	-	-	-	-	-	-	-	-	-	-	-	-	1	1	-	-
LTRE1HVBLT49	-	-	1	1	2	-	-	2	-	-	-	1	-	-	-	-	-	-	-	-	-	-	-	1	-	1	1	1	-	1	1	1	1	-	-	1	-	-	-	-	1	-	-	1	-	1	1	-	-
LTREATLTI78	-	-	-	-	-	-	-	-	-	-	-	-	-	-	2	-	-	1	-	-	1	-	1	-	1	-	-	-	-	-	-	-	-	-	-	-	-	-	-	-	-	-	-	-	-	1	-	-	-
LTRECOREATCOR15	2	1	2	3	3	7	1	4	3	1	3	-	2	1	6	-	5	1	4	3	3	2	3	4	3	2	3	1	2	6	6	2	1	1	1	-	10	5	4	3	8	8	3	-	-	6	13	2	-
MARABOX1	-	-	-	1	-	-	-	-	-	-	-	-	-	-	-	-	-	-	-	-	-	1	-	-	-	-	-	-	-	-	1	2	-	-	-	-	-	-	-	-	-	-	-	-	-	-	-	-	-
MARARS	-	-	-	-	-	-	-	-	1	-	-	-	-	-	-	-	-	-	-	-	-	-	-	-	-	-	-	-	-	-	-	-	-	1	-	-	-	-	-	-	-	-	-	-	-	-	-	-	-
MARTBOX	1	-	1	-	-	-	2	-	3	-	-	3	-	-	-	-	-	-	-	-	-	1	-	-	-	2	3	-	-	-	-	-	-	-	-	1	-	1	-	-	-	-	-	-	-	-	-	-	-
MNF1ZMPPC1	-	-	-	-	-	-	-	-	-	-	-	-	-	-	-	-	-	-	-	-	-	-	-	-	-	-	-	-	-	-	-	-	-	-	-	-	-	-	-	-	-	-	-	-	-	-	-	-	-
MSACRCYM	-	1	-	-	-	-	-	-	-	-	-	-	-	-	-	-	-	-	-	-	-	-	-	-	-	-	-	-	-	-	-	-	-	-	-	-	-	-	-	-	-	-	-	-	-	-	1	-	-
MYB1AT	2	4	1	-	2	3	2	2	1	2	1	4	1	1	1	4	-	3	2	1	2	2	5	2	1	-	1	3	3	-	3	2	1	3	3	4	-	2	4	1	-	3	1	3	1	2	1	1	-
MYB1LEPR	1	1	-	-	-	-	1	-	-	1	-	-	-	-	1	-	2	-	-	-	-	-	-	-	1	-	-	-	-	-	-	-	1	-	1	-	-	-	-	-	-	-	1	-	-	-	-	-	-
MYB26PS	-	-	-	-	-	-	-	-	-	-	-	-	-	-	-	-	-	1	-	-	-	-	1	-	-	-	-	-	-	1	-	-	-	-	-	-	-	-	-	-	-	-	-	-	-	-	-	-	-
MYB2AT	-	-	1	2	-	1	-	-	1	1	2	-	-	-	2	2	-	-	-	-	1	1	-	2	-	-	-	-	-	1	1	-	-	-	-	-	2	-	1	-	1	-	-	-	-	-	-	-	-
MYB2CONSENSUSAT	2	3	4	13	2	1	1	2	2	1	3	-	-	2	2	2	1	1	-	-	1	4	2	3	1	2	-	-	1	1	3	2	1	2	1	1	3	-	6	2	3	2	1	-	7	1	3	3	1
MYBATRD22	-	-	-	-	-	-	1	-	-	-	-	-	-	-	-	-	-	1	1	-	-	-	-	1	-	-	-	-	-	-	-	-	-	-	1	1	-	1	-	-	-	-	1	1	-	-	-	-	-
MYBCORE	3	5	5	15	6	2	4	5	6	7	5	1	4	5	2	2	1	1	1	-	4	6	2	8	4	2	-	1	1	3	4	3	3	3	6	5	3	4	9	5	5	4	1	-	9	2	6	7	4
MYBCOREATCYCB1	5	4	5	1	-	4	3	4	-	-	2	-	1	-	-	1	3	-	1	1	-	-	2	2	3	4	2	-	1	2	1	1	3	2	1	1	3	2	5	1	3	3	2	-	10	3	4	2	1
MYBGAHV	-	1	-	-	1	1	1	-	-	1	-	-	1	1	-	-	-	-	-	-	-	-	-	-	-	1	-	-	-	-	-	-	1	2	-	-	-	-	1	-	-	-	-	-	1	-	-	-	-
MYBPLANT	1	-	-	-	-	-	-	1	1	1	1	1	-	1	-	1	-	1	-	-	1	-	1	-	-	2	3	-	-	1	-	1	1	-	1	4	-	1	2	1	-	-	-	-	1	-	1	-	-
MYBPZM	1	-	-	-	1	-	4	4	3	-	1	1	1	-	-	1	-	1	4	3	2	-	2	-	1	3	2	2	-	2	2	3	-	-	6	2	-	2	2	2	1	2	2	-	9	-	1	-	1
MYBST1	2	2	2	1	3	3	2	1	4	2	1	5	3	3	3	1	-	-	1	1	2	3	4	2	3	2	2	1	-	2	-	-	6	3	4	3	1	2	1	1	6	5	7	6	-	2	-	2	-
MYCATERD1	1	8	1	5	1	-	1	-	1	3	2	-	1	3	-	-	-	1	-	-	1	3	-	1	-	1	-	-	-	-	1	1	3	1	1	-	-	2	-	2	-	-	1	-	2	2	2	-	-
MYCATRD22	1	8	1	5	1	-	1	-	1	3	2	-	1	3	-	-	-	1	-	-	1	3	-	1	-	1	-	-	-	-	1	1	3	1	1	-	-	2	-	2	-	-	1	-	2	2	2	-	-
MYCCONSENSUSAT	12	26	10	44	22	2	16	14	14	22	10	8	12	22	14	6	10	16	10	6	10	30	10	12	8	6	2	10	14	6	10	10	10	16	8	10	6	12	10	20	2	-	14	18	16	14	10	8	8
NAPINMOTIFBN	1	-	-	-	-	-	-	-	-	-	-	-	-	-	-	-	-	1	-	-	-	-	-	1	-	-	-	-	-	-	-	-	-	1	-	-	-	-	-	-	-	-	-	-	1	-	1	-	-
NODCON1GM	2	2	-	1	1	3	-	-	3	-	-	4	3	3	2	2	-	1	1	-	1	-	-	1	-	-	2	-	-	1	2	1	-	1	-	1	1	4	1	-	-	-	-	3	-	-	-	-	-
NODCON2GM	2	1	3	4	4	1	-	1	2	8	5	7	3	3	5	3	1	5	6	8	2	6	3	2	2	1	2	4	-	4	2	3	1	4	3	8	2	1	4	1	5	6	-	7	4	3	2	7	5
NONAMERATH4	-	-	-	-	-	-	-	-	-	-	-	-	-	-	-	-	-	-	-	-	-	-	-	-	1	-	-	-	-	-	-	-	-	-	-	-	-	-	-	-	-	-	-	-	-	-	-	-	-
NONAMERMOTIFTAH3H4	-	-	-	-	-	-	-	-	-	-	-	-	1	-	-	-	1	-	-	-	-	-	-	-	-	-	1	-	-	-	-	-	-	-	-	-	-	-	-	-	-	-	-	-	-	-	-	-	-
NRRBNEXTA	-	-	-	-	-	1	-	-	-	-	-	-	-	1	-	-	-	-	-	-	-	-	-	-	-	-	-	1	-	1	-	-	-	-	-	-	-	-	-	-	-	-	-	-	-	-	-	-	-
NTBBF1ARROLB	-	-	-	2	-	-	-	1	-	2	1	-	-	-	1	3	-	1	-	1	1	1	-	2	1	-	-	1	1	-	1	-	3	1	-	1	-	-	-	-	-	1	-	-	1	1	-	-	-
OCTAMERMOTIFTAH3H4	-	-	-	-	-	-	-	1	-	-	1	-	-	-	-	-	-	-	-	-	-	-	-	-	-	-	-	-	-	-	1	-	-	-	1	1	-	-	-	-	1	-	-	-	-	-	-	-	-
OCTAMOTIF2	-	-	-	-	-	-	-	-	-	-	-	-	-	-	-	-	1	-	-	-	-	-	-	-	-	-	-	-	-	-	1	1	-	-	-	-	-	-	-	-	-	-	-	-	-	-	-	-	-
OPAQUE2ZMB32	-	-	1	-	-	-	-	-	-	-	-	-	-	-	-	-	-	-	-	-	-	-	-	1	-	-	-	-	-	-	-	-	-	-	-	1	-	-	-	-	-	-	-	-	-	-	-	-	-
OSE1ROOTNODULE	2	2	-	1	1	3	-	-	3	-	-	4	3	3	2	2	-	1	1	-	1	-	-	1	-	-	2	-	-	1	2	1	-	1	-	1	1	4	1	-	-	-	-	3	-	-	-	-	-
OSE2ROOTNODULE	2	1	3	4	4	1	-	1	2	8	5	7	3	3	5	3	1	5	6	8	2	6	3	2	2	1	2	4	-	4	2	3	1	4	3	8	2	1	4	1	5	6	-	7	4	3	2	7	5
P1BS	-	2	-	-	-	-	4	-	4	2	-	2	-	-	2	-	-	2	2	2	-	-	-	-	-	2	-	-	-	-	-	-	-	-	-	-	-	-	-	2	4	2	4	2	-	2	-	-	-
PALBOXAPC	2	2	3	2	-	-	4	5	1	-	1	-	-	-	-	-	3	-	-	-	-	-	2	1	-	1	1	-	-	3	-	1	-	-	2	1	1	-	2	1	2	3	4	1	4	1	2	2	2
PALBOXPPC	-	-	-	-	-	-	-	1	-	-	-	-	-	-	-	-	-	-	-	-	-	-	-	-	-	-	-	-	-	-	-	-	-	-	-	-	-	-	-	-	-	-	-	-	-	-	-	-	-
PALINDROMICCBOXGM	-	-	-	-	-	-	-	-	-	-	-	-	-	-	-	-	-	-	-	-	-	-	-	-	-	-	-	-	-	-	-	-	-	-	-	-	-	-	-	-	-	-	-	-	-	-	-	-	-
PE2FNTRNR1A	-	-	-	1	-	-	-	-	-	-	-	-	-	-	-	-	-	-	-	-	-	-	-	-	-	-	-	-	-	-	-	-	-	-	1	-	-	-	-	-	-	-	-	-	-	-	-	-	-
POLASIG1	1	1	2	4	2	3	3	-	-	5	1	3	3	1	-	4	-	2	-	1	-	4	1	3	2	-	2	3	1	-	5	5	4	2	2	3	1	2	-	1	3	2	-	-	1	2	-	-	-
POLASIG2	-	-	1	-	1	-	-	1	-	1	-	-	1	1	-	-	-	-	-	-	-	-	-	-	-	1	-	-	2	-	-	-	1	1	-	1	-	-	-	1	-	-	1	-	1	1	-	-	-
POLASIG3	1	-	1	1	-	3	-	-	-	-	-	4	1	-	2	1	-	2	3	3	2	1	-	1	-	1	4	1	1	-	4	3	2	2	2	2	-	1	-	-	-	1	-	-	1	1	-	1	-
POLLEN1LELAT52	2	8	3	2	3	7	2	1	6	10	4	6	8	10	3	8	-	1	1	1	3	6	1	7	11	9	6	8	2	2	6	1	14	9	7	4	1	12	6	5	4	3	3	3	8	2	8	2	-
PREATPRODH	-	-	-	-	1	2	1	-	1	2	1	2	1	-	1	-	-	-	-	-	1	-	-	-	-	3	2	-	-	-	2	-	2	4	1	1	-	1	-	-	-	-	1	-	-	-	-	2	-
PRECONSCRHSP70A	4	1	2	2	4	3	3	1	3	2	-	1	2	1	6	1	3	-	1	2	4	1	3	1	2	2	3	-	3	1	4	-	2	-	6	6	8	2	3	3	3	2	2	2	2	1	8	4	3
PROLAMINBOXOSGLUB1	1	-	1	1	-	-	-	-	-	-	1	-	-	-	-	3	1	1	-	-	-	-	-	-	1	-	-	-	-	-	-	-	-	-	1	-	-	-	-	-	-	-	1	-	-	-	-	-	-
PROXBBNNAPA	-	1	-	-	-	-	-	-	-	-	-	-	-	-	-	2	-	-	-	-	-	1	-	-	-	-	-	-	-	1	-	-	-	-	-	-	-	-	1	-	-	-	-	-	-	-	-	-	-
PYRIMIDINEBOXHVEPB1	-	-	1	1	-	-	-	-	1	-	-	1	-	1	-	-	-	-	-	-	-	-	-	1	-	2	2	-	-	-	-	-	1	2	-	-	-	-	1	-	-	-	-	-	-	-	-	-	-
PYRIMIDINEBOXOSRAMY1A	1	-	2	1	4	1	-	1	1	2	-	1	1	1	-	-	-	1	-	2	2	2	1	1	1	3	2	-	3	-	1	-	1	-	1	-	1	5	-	1	2	1	-	-	4	-	-	3	-
QARBNEXTA	1	-	-	-	-	-	1	-	-	-	-	-	-	-	-	-	-	-	-	-	-	1	-	-	-	-	-	-	-	-	-	-	-	-	-	1	-	-	-	-	1	-	-	-	-	-	-	-	1
QELEMENTZMZM13	-	-	-	1	-	-	2	2	-	1	-	-	1	-	-	-	-	1	1	1	-	2	1	1	1	-	-	-	1	2	-	-	-	1	-	-	-	1	-	2	-	-	-	-	-	1	-	1	-
RAV1AAT	7	5	2	3	5	5	3	4	11	8	4	8	3	3	2	3	-	6	2	1	5	6	2	6	2	2	9	5	2	1	8	4	1	4	8	5	2	5	2	4	6	3	1	7	3	6	4	3	1
RAV1BAT	2	2	3	1	-	-	-	-	-	2	-	-	1	2	2	-	2	1	2	2	1	2	2	-	1	-	-	-	2	-	-	2	-	1	-	-	1	-	2	-	-	-	3	1	-	-	1	-	-
RBCSCONSENSUS	-	-	-	-	2	-	1	1	-	-	-	-	-	-	1	-	-	1	1	1	1	-	-	-	-	-	1	1	-	2	2	-	-	-	-	-	-	-	-	-	-	-	-	-	-	-	-	-	-
RBCSGBOXPS	-	-	-	1	-	-	-	-	-	-	-	-	-	-	-	-	-	-	-	-	-	-	-	-	-	-	-	-	-	-	-	-	-	-	-	-	-	-	-	-	-	-	-	-	-	-	-	-	-
REALPHALGLHCB21	-	2	2	-	3	3	-	1	1	1	2	5	-	1	-	4	-	3	1	-	1	-	1	1	-	-	1	2	4	-	1	-	3	2	2	3	1	-	4	1	-	3	-	2	1	-	-	1	-
REBETALGLHCB21	1	-	1	1	1	-	-	-	2	1	-	-	-	-	-	-	-	-	-	-	-	1	1	-	-	-	-	-	-	1	-	-	-	-	2	1	1	-	-	-	2	1	-	1	-	-	-	-	-
RGATAOS	-	-	-	-	-	-	-	-	-	-	-	-	-	-	-	-	-	-	-	-	-	-	-	1	-	-	-	-	-	-	-	-	-	-	-	-	-	-	-	-	-	-	-	-	-	-	-	-	-
RHERPATEXPA7	3	2	1	5	1	7	3	2	3	2	1	2	3	2	3	-	3	3	1	-	1	4	1	2	1	3	4	-	6	5	3	2	2	1	4	6	4	3	3	4	4	2	4	-	2	1	3	3	1
ROOTMOTIFTAPOX1	2	1	6	3	6	6	1	6	5	6	3	11	2	8	4	9	2	4	4	4	1	10	-	2	3	7	2	4	1	7	5	4	8	11	8	4	-	3	-	3	3	1	2	1	2	7	2	1	-
RYREPEATBNNAPA	1	5	7	1	-	4	3	-	2	2	8	2	1	1	-	8	3	2	-	-	2	2	-	1	1	1	-	1	-	2	-	1	-	-	3	2	-	1	1	2	-	2	2	-	-	3	2	-	-
RYREPEATGMGY2	-	1	1	-	-	4	1	-	-	1	6	1	-	1	-	7	2	-	-	-	-	2	-	-	-	-	-	1	-	-	-	1	-	-	-	-	-	1	-	1	-	2	-	-	-	-	-	-	-
RYREPEATLEGUMINBOX	-	3	5	-	-	4	2	-	-	1	6	1	-	1	-	8	2	-	-	-	-	2	-	-	-	1	-	1	-	1	-	1	-	-	-	-	-	1	-	1	-	2	-	-	-	1	1	-	-
RYREPEATVFLEB4	-	-	-	-	-	2	-	-	-	-	2	-	-	-	-	4	-	-	-	-	-	2	-	-	-	-	-	-	-	-	-	-	-	-	-	-	-	-	-	-	-	2	-	-	-	-	-	-	-
S1FBOXSORPS1L21	-	-	-	1	-	1	-	-	2	1	-	-	1	-	1	1	-	-	-	-	1	1	-	2	-	-	-	-	-	-	2	2	-	-	-	-	-	-	2	-	1	1	-	-	-	1	-	1	-
S1FSORPL21	-	-	-	-	-	-	-	-	-	-	-	-	-	-	-	1	-	-	-	-	-	-	-	-	-	-	-	-	-	-	-	-	-	-	-	-	-	-	-	-	1	1	-	-	-	-	-	1	-
S2FSORPL21	-	-	-	-	-	-	-	-	-	-	-	-	-	-	-	-	-	-	-	1	-	-	-	-	-	-	-	-	-	-	-	-	1	-	-	-	-	-	-	-	-	-	-	-	-	-	-	-	-
SBOXATRBCS	1	-	-	-	-	1	-	-	-	-	-	1	-	-	-	-	-	-	-	-	-	-	-	-	-	-	-	-	-	-	-	-	-	-	-	-	-	-	1	-	-	-	-	-	-	-	-	2	-
SEBFCONSSTPR10A	-	2	-	-	-	-	-	-	-	-	1	2	-	-	1	1	-	-	-	-	3	-	1	-	2	-	-	1	-	-	1	-	-	1	1	1	3	1	1	-	-	-	1	1	1	1	1	-	-
SEF1MOTIF	-	-	-	-	-	-	-	-	-	-	-	1	-	-	-	-	-	-	-	-	-	-	-	-	-	1	-	-	-	-	2	1	-	2	-	-	-	-	-	-	-	-	-	-	-	-	-	-	-
SEF3MOTIFGM	-	-	-	-	2	-	-	-	-	2	-	1	-	-	2	-	-	1	1	-	1	1	-	1	-	1	1	1	1	1	1	1	-	1	3	2	1	1	-	1	1	1	3	1	1	-	-	-	-
SEF4MOTIFGM7S	1	3	5	2	1	3	1	-	2	4	-	6	-	-	-	4	4	1	1	1	2	-	-	-	2	3	3	-	1	-	3	2	5	6	2	1	2	3	2	1	1	1	1	3	2	-	-	2	-
SITEIIAOSPCNA	-	-	-	-	-	-	1	-	-	-	-	-	-	1	-	-	-	-	-	-	-	-	-	-	-	-	-	-	-	-	-	-	-	-	-	-	-	-	-	-	-	-	-	-	-	-	-	-	-
SITEIIATCYTC	1	1	2	1	2	8	2	1	1	1	-	1	1	1	3	-	-	1	1	3	1	1	-	1	2	2	2	4	-	3	-	-	-	-	1	3	1	4	2	2	3	-	1	-	2	1	-	1	-
SITEIOSPCNA	-	-	-	-	-	-	-	-	-	-	-	-	-	-	-	-	-	-	-	-	-	1	-	-	-	-	-	-	1	-	-	1	-	-	-	-	-	-	1	-	-	-	-	-	-	-	-	-	-
SORLIP1AT	4	8	4	10	5	1	4	10	1	2	5	3	2	2	1	2	2	3	4	3	2	3	2	3	4	5	8	1	1	6	1	-	-	2	4	1	5	8	3	5	3	2	2	7	2	8	4	4	4
SORLIP2AT	3	3	-	2	4	15	4	12	4	-	2	1	-	2	3	1	4	-	1	3	2	-	1	4	7	2	-	4	3	7	2	3	2	-	1	1	11	6	4	2	6	5	8	2	2	3	2	3	5
SORLIP3AT	-	-	-	-	-	-	-	-	-	-	-	-	-	-	-	-	-	-	-	-	-	-	-	-	-	-	-	-	-	-	-	-	-	-	-	-	-	-	-	-	-	-	-	-	-	1	-	-	-
SORLIP5AT	-	-	-	-	-	-	-	1	-	-	-	1	-	-	-	-	-	-	1	1	-	-	-	-	-	-	-	-	-	-	-	-	-	-	-	-	-	1	1	-	-	-	-	-	-	1	1	-	1
SORLREP2AT	-	-	-	-	-	-	1	-	1	-	-	-	-	-	-	-	-	-	-	-	-	-	-	-	-	-	-	-	-	-	-	-	-	-	-	-	-	-	-	-	-	-	-	-	-	-	1	-	-
SORLREP3AT	-	-	-	-	-	-	-	-	-	-	-	1	-	-	-	-	-	-	-	-	-	-	-	-	-	-	-	1	-	-	-	-	-	-	-	-	-	-	-	-	-	-	-	-	-	-	-	-	-
SORLREP4AT	-	-	-	-	-	-	-	-	-	-	-	-	-	-	-	-	-	-	1	1	-	-	-	-	-	-	-	-	-	-	-	-	-	-	-	-	-	-	-	-	-	-	-	-	-	-	-	-	-
SP8BFIBSP8AIB	-	-	-	-	-	-	-	-	-	-	-	-	-	-	-	-	-	-	-	-	-	-	-	-	-	-	-	-	-	-	-	-	-	-	-	-	-	-	-	-	-	-	-	-	-	-	-	-	-
SP8BFIBSP8BIB	1	-	1	-	-	-	-	-	-	2	-	1	-	1	-	1	-	-	1	-	-	-	-	-	-	1	1	-	-	-	-	-	-	1	-	3	-	-	1	-	-	-	-	-	-	-	-	-	-
SPHCOREZMC1	-	-	-	-	-	-	-	-	-	-	-	-	-	-	-	-	-	-	-	-	-	-	-	-	-	-	-	-	-	-	-	-	-	-	-	-	-	-	-	-	-	-	-	-	-	-	-	-	-
SREATMSD	1	-	-	-	2	1	-	-	-	1	1	3	2	1	-	-	-	-	1	1	-	2	2	-	1	-	-	-	-	1	-	-	3	1	1	1	-	-	-	-	1	2	1	2	-	-	-	1	-
SURE1STPAT21	-	-	-	-	-	-	-	-	-	-	-	-	-	-	-	1	-	-	-	-	-	1	-	-	-	-	-	-	-	-	-	-	-	-	-	-	-	-	-	-	-	-	-	-	-	-	-	-	-
SURE2STPAT21	-	-	-	1	-	-	-	-	-	-	-	-	-	-	-	-	-	-	-	-	-	-	-	-	-	-	-	-	-	-	-	-	-	-	-	-	-	-	-	-	-	-	-	-	-	-	-	-	-
SURECOREATSULTR11	2	1	2	3	4	2	3	2	4	1	1	3	2	2	7	4	6	5	2	3	6	1	3	2	2	4	4	3	1	4	3	4	4	2	3	1	2	1	2	1	1	2	2	4	4	6	6	4	5
SV40COREENHAN	1	2	-	-	1	-	-	-	-	1	-	-	-	-	2	-	-	-	2	-	-	1	-	-	-	-	1	-	-	-	-	-	-	-	-	1	1	1	6	2	-	-	-	-	-	-	1	-	-
T/GBOXATPIN2	2	-	-	2	-	-	3	1	1	-	-	-	1	-	-	-	-	1	-	-	-	1	-	1	1	-	-	-	1	-	1	-	-	-	1	4	2	-	-	-	3	-	1	-	-	-	1	1	1
TAAAGSTKST1	2	2	1	4	1	2	-	1	2	7	2	4	3	5	3	3	-	6	5	6	3	5	2	5	3	-	1	2	2	-	2	1	3	5	1	2	2	2	1	-	-	1	-	2	2	2	-	-	-
TATABOX2	-	-	-	-	1	3	-	-	-	-	1	-	1	1	1	-	1	1	-	-	1	1	-	-	-	-	-	2	-	-	1	-	-	6	-	-	-	-	-	-	-	-	1	-	-	1	-	-	-
TATABOX3	-	-	-	-	-	-	-	2	-	1	-	-	-	-	-	-	-	-	-	-	-	-	-	-	1	1	-	1	-	-	-	-	-	-	-	-	-	1	-	-	-	-	-	-	-	1	-	-	-
TATABOX4	-	1	1	1	-	7	2	-	1	-	-	-	-	-	2	-	-	-	-	-	1	-	-	-	-	-	-	4	-	-	2	2	1	2	-	-	1	-	-	-	-	-	-	-	-	-	-	-	-
TATABOX5	-	-	1	3	1	4	3	-	-	3	2	6	6	1	2	3	-	4	2	2	2	3	-	2	2	-	3	4	2	1	6	7	5	2	1	2	-	5	-	1	2	2	-	-	3	1	-	-	-
TATABOXOSPAL	-	-	-	-	1	-	-	-	1	-	-	1	-	-	-	-	-	1	-	-	-	1	-	-	-	1	-	-	-	-	-	1	2	-	-	-	-	-	-	-	1	1	-	1	-	-	-	-	-
TATAPVTRNALEU	-	1	-	-	-	2	2	-	1	-	-	-	-	-	-	-	-	-	-	-	-	-	-	-	-	-	-	2	-	-	1	-	-	1	-	-	1	-	-	-	-	-	-	-	-	-	-	-	-
TATCCACHVAL21	-	1	-	-	-	-	-	-	1	-	-	-	-	-	-	-	-	-	-	-	-	-	-	-	-	-	-	-	-	-	-	-	-	-	-	-	-	-	-	-	-	-	-	-	-	-	-	1	-
TATCCAOSAMY	-	2	1	-	-	1	1	1	2	-	-	2	2	-	1	-	-	-	-	-	1	2	-	2	2	1	-	-	-	-	-	-	2	1	1	-	-	1	1	-	-	-	5	-	-	2	-	1	-
TATCCAYMOTIFOSRAMY3D	-	2	1	-	-	-	1	1	2	-	-	-	1	-	-	-	-	-	-	-	-	1	-	-	-	1	-	-	-	-	-	-	-	1	-	-	-	-	1	-	-	-	4	-	-	1	-	1	-
TBOXATGAPB	1	1	1	3	1	3	-	-	-	1	-	1	-	-	-	4	-	1	2	1	-	-	1	-	1	1	1	-	-	-	1	-	-	1	-	1	-	-	-	-	-	-	-	-	-	-	-	-	1
TCA1MOTIF	-	-	-	-	-	-	-	-	-	-	-	-	-	-	-	-	-	-	-	1	-	-	-	-	-	-	-	-	-	-	-	1	-	-	-	-	-	-	-	-	-	-	-	-	-	-	-	-	-
TE2F2NTPCNA	-	-	-	-	-	-	-	-	-	-	-	-	-	-	-	-	-	-	-	-	-	-	-	-	-	-	-	-	-	-	-	-	-	-	-	-	-	-	-	-	-	-	-	-	-	1	1	-	-
TELOBOXATEEF1AA1	-	-	-	-	-	-	-	-	-	-	-	-	-	-	-	-	-	-	-	-	-	-	-	-	-	-	-	-	-	-	-	-	-	-	-	-	-	-	-	-	-	-	-	-	-	-	-	-	-
TGACGTVMA	-	-	-	-	-	-	-	-	-	-	-	-	-	-	-	-	-	-	-	-	-	-	-	-	-	-	-	-	-	-	-	-	-	-	-	-	-	-	-	-	-	-	-	-	-	-	-	-	-
TGACGTVMAMY	1	1	-	-	1	-	-	-	1	-	1	-	1	-	1	-	-	-	-	-	-	-	1	-	1	1	1	1	-	-	-	-	-	-	-	1	-	-	-	-	-	-	-	1	-	-	-	1	-
TGTCACACMCUCUMISIN	-	1	1	-	-	-	1	1	-	1	1	-	-	-	-	-	-	-	-	-	-	-	-	-	1	-	-	-	2	-	1	-	1	-	-	-	-	1	-	-	-	-	-	-	-	1	1	-	-
TL1ATSAR	-	-	-	-	-	-	-	-	-	-	-	-	-	-	-	-	-	-	-	-	-	-	-	-	-	-	-	-	-	-	-	-	-	-	-	-	-	-	-	-	-	-	-	-	-	-	-	-	-
TOPOISOM	-	-	-	-	-	-	-	-	-	-	-	-	-	-	-	-	-	-	-	-	-	-	-	-	-	-	-	-	-	-	-	-	-	-	-	-	-	-	-	-	-	-	-	-	-	-	-	-	-
UP1ATMSD	-	-	-	-	-	-	-	-	-	-	-	-	-	-	-	-	-	-	-	-	-	-	-	-	-	-	-	-	-	-	-	-	-	-	-	-	-	-	-	-	-	-	-	-	-	-	-	-	-
UP2ATMSD	-	-	-	-	-	-	-	-	-	-	-	-	-	-	-	-	-	-	-	-	-	-	-	-	-	-	-	-	-	1	-	-	-	-	-	-	-	-	1	-	-	-	-	-	-	-	-	-	-
UPRMOTIFIAT	-	1	-	-	1	-	-	-	-	-	1	-	-	-	-	-	-	-	-	-	-	-	-	-	-	1	1	-	-	-	-	-	-	-	-	-	-	-	-	-	-	-	-	-	-	-	-	-	-
UPRMOTIFIIAT	-	-	-	-	1	-	1	1	-	-	1	-	-	-	1	-	-	-	1	1	-	-	-	-	-	-	-	-	-	1	-	-	-	-	-	-	1	1	1	1	-	-	1	-	-	1	1	-	-
VSF1PVGRP18	-	-	1	-	-	-	-	-	-	-	-	-	-	-	-	-	-	-	-	-	-	-	-	-	-	-	-	-	-	-	-	-	-	-	-	-	-	-	-	-	-	-	-	-	-	1	-	-	-
WBBOXPCWRKY1	1	1	1	1	-	2	-	-	-	1	-	1	2	2	1	3	-	-	-	-	1	-	-	-	1	-	-	-	1	-	1	1	2	2	1	3	-	-	-	-	1	1	-	1	3	-	1	1	-
WBOXATNPR1	2	7	7	2	2	4	2	-	-	2	2	3	4	2	4	4	3	3	2	-	3	1	2	1	1	2	1	3	1	1	3	4	5	3	2	5	2	3	1	4	1	5	1	2	4	2	3	2	1
WBOXHVISO1	1	3	3	-	3	2	4	-	2	4	2	3	-	2	7	2	1	2	1	-	3	2	2	-	1	-	1	1	2	2	1	-	3	2	2	5	1	2	2	3	4	2	-	3	2	3	2	-	1
WBOXNTCHN48	-	-	2	-	-	2	5	-	1	2	2	-	-	1	3	-	-	-	-	-	-	1	1	1	1	-	-	-	-	2	-	-	1	-	-	1	-	1	2	4	1	1	-	1	1	1	1	1	-
WBOXNTERF3	2	6	6	1	4	5	8	3	2	6	3	3	2	6	8	7	2	4	2	1	4	5	4	1	4	1	1	1	4	6	3	1	4	3	2	5	1	4	5	10	7	2	2	4	7	6	5	4	2
WRECSAA01	-	-	-	-	-	-	-	-	-	-	-	-	-	-	-	-	-	-	-	-	-	-	-	-	-	-	-	-	-	-	1	-	-	-	-	-	-	-	-	-	-	-	-	-	-	-	-	-	-
WRKY71OS	6	17	14	4	8	9	11	5	5	10	6	10	9	10	14	12	9	7	4	2	11	8	9	5	12	5	4	6	7	8	7	6	12	6	3	10	9	9	6	14	9	9	6	8	9	13	11	10	6
WUSATAg	1	-	-	-	-	-	-	-	-	1	-	-	-	-	-	1	-	-	1	1	-	-	-	-	-	-	-	1	-	-	-	-	-	-	-	-	-	-	1	-	-	2	-	-	-	-	-	-	-
XYLAT	-	-	-	-	-	1	-	-	-	-	-	-	2	1	-	-	-	-	-	-	-	1	-	1	-	-	-	1	-	-	-	-	-	-	-	-	-	1	-	-	-	-	1	-	-	-	-	-	-
ZDNAFORMINGATCAB1	-	-	-	-	-	1	-	-	-	-	-	1	-	-	-	-	-	-	-	-	-	-	-	-	-	-	-	-	-	-	-	-	-	-	-	-	-	-	-	-	-	1	-	-	-	-	-	-	-
[truncated: 2 more columns]

## Sheet: Additional file 4
Additional file 4. Annotations of putative TuATGs cis-acting regulatory DNA elements identified in PLACE
Cis-element	Tu6A_ATG2a	Tu7A_ATG2b	Tu1A_ATG3a	Tu2A_ATG4a	Tu6A_ATG5a	Tu6A_ATG5b	Tu3A_ATG6a	Tu3A_ATG7a	Tu2A_ATG8a	Tu2A_ATG8b	Tu5A_ATG8c	Tu4A_ATG9a	Tu2A_ATG10a	Tu6A_ATG11a	Tu6A_ATG12a	Tu7A_ATG12b	Tu2A_ATG13a	Tu4A_ATG13b	Tu1A_ATG14a	Tu2A_ATG14b	Tu5A_ATG14c	Tu5A_ATG16a	Tu1A_ATG18a	Tu3A_ATG18b	Tu6A_ATG18c	Tu3A_ATG22a	Tu4A_ATG27a	Tu2A_ATG101a	Tu2A_ATG101a
-10PEHVPSBD	-	-	-	-	-	1	1	1	1	-	-	1	1	1	-	2	2	3	2	4	-	2	1	3	-	2	-	2	-
-300CORE	-	-	-	-	-	-	-	-	-	-	-	-	1	-	-	-	-	-	-	-	-	-	-	-	-	-	-	1	1
-300ELEMENT	3	3	1	1	2	2	-	2	2	2	1	-	2	-	-	-	-	-	-	3	-	-	-	1	2	2	-	1	-
-300MOTIFZMZEIN	-	-	-	-	-	-	-	-	-	-	-	-	-	-	-	-	-	-	-	-	-	-	-	-	1	-	-	-	2
2SSEEDPROTBANAPA	1	-	-	-	-	-	1	-	2	-	-	-	1	-	-	1	-	-	-	-	2	-	1	-	-	-	-	-	6
5659BOXLELAT5659	-	-	-	-	-	-	-	-	-	-	-	-	1	-	-	-	-	-	-	-	-	-	-	-	-	-	-	-	1
AACACOREOSGLUB1	1	1	-	1	-	-	-	2	3	2	-	-	-	-	-	-	1	-	1	1	1	1	-	-	1	-	-	1	1
ABREATCONSENSUS	-	-	-	-	-	-	1	1	-	-	-	1	-	-	-	-	-	-	1	-	-	-	-	-	1	-	-	-	1
ABREATRD22	-	-	-	-	-	-	-	-	-	-	-	-	-	-	-	-	-	-	1	-	-	-	-	-	1	-	-	-	-
ABREAZMRAB28	-	-	-	-	-	-	-	-	-	-	-	-	-	-	-	-	-	-	-	-	-	-	-	-	-	-	-	-	-
ABRECE1HVA22	-	-	-	-	-	-	-	-	-	-	-	-	-	-	-	-	-	-	-	-	-	-	-	-	-	-	-	-	4
ABRELATERD1	-	-	3	2	3	3	4	3	-	4	1	4	1	7	5	-	2	1	6	6	3	-	5	1	7	1	5	-	3
ABREMOTIFAOSOSEM	-	-	-	-	-	-	-	-	-	-	-	-	-	-	1	-	-	1	-	-	-	-	-	-	-	-	1	-	1
ABREOSRAB21	-	-	-	-	-	1	-	1	-	-	-	1	-	-	-	-	-	-	-	1	1	-	2	-	-	-	1	-	1
ABRERATCAL	1	-	2	1	1	1	1	2	-	3	-	2	-	7	5	-	-	1	5	2	2	1	3	1	5	-	3	1	-
ABREZMRAB28	-	-	-	-	-	-	-	-	-	-	-	-	-	-	-	-	-	-	-	-	-	-	-	-	-	-	-	-	-
ACGTABOX	-	-	2	-	-	2	-	-	-	2	-	-	-	2	2	-	-	-	-	-	-	-	-	2	-	-	-	2	-
ACGTABREMOTIFA2OSEM	-	-	2	-	-	1	2	1	-	1	-	1	-	2	2	-	-	1	1	1	-	-	1	-	2	1	1	-	-
ACGTABREMOTIFAOSOSEM	-	-	-	-	-	-	-	-	-	-	-	-	-	-	1	-	-	1	-	-	-	-	-	-	-	-	1	-	-
ACGTATERD1	4	4	10	6	8	12	6	12	-	12	4	12	2	16	14	2	4	4	12	8	12	2	10	4	12	6	14	6	-
ACGTCBOX	-	-	-	-	-	-	-	-	-	-	-	-	-	-	2	-	-	-	-	-	-	2	-	-	-	-	-	2	2
ACGTOSGLUB1	-	-	-	-	-	-	1	-	-	-	-	-	-	1	1	-	-	-	-	-	-	-	-	-	-	-	1	-	50
ACGTTBOX	2	-	-	-	-	-	-	-	-	-	-	-	-	-	-	-	-	-	-	-	-	-	-	-	-	2	2	-	-
ACIIIPVPAL2	-	-	-	-	-	-	-	-	-	1	-	-	-	-	-	-	-	-	-	-	-	-	-	-	-	-	-	-	2
AGATCONSENSUS	-	-	-	-	-	-	-	-	-	-	-	-	-	-	-	-	-	-	-	-	-	-	-	-	-	-	-	-	1
AGCBOXNPGLB	1	-	-	-	-	-	-	-	-	-	2	-	1	1	-	-	-	-	-	-	1	-	2	-	-	-	-	-	2
AGL2ATCONSENSUS	-	-	-	-	-	-	-	-	-	-	-	-	-	-	-	-	-	-	-	-	-	-	-	-	-	-	-	-	2
AGMOTIFNTMYB2	-	-	-	-	1	1	-	1	-	-	-	-	-	-	-	-	-	-	-	-	-	-	-	-	-	-	-	-	3
AMMORESIIUDCRNIA1	-	-	1	-	-	-	-	-	-	1	-	-	-	-	-	-	-	-	-	1	-	-	-	-	-	-	-	-	-
AMMORESIVDCRNIA1	1	-	-	-	2	-	-	-	1	-	-	-	-	-	-	-	-	-	-	1	-	1	-	-	-	-	-	-	-
AMMORESVDCRNIA1	-	-	-	-	-	-	-	-	-	-	-	-	-	-	-	-	-	-	-	-	-	-	-	-	-	-	-	-	-
AMYBOX1	2	-	1	-	2	2	-	2	-	-	-	1	1	1	-	-	-	1	-	2	1	1	-	-	1	-	-	-	-
AMYBOX2	1	-	-	1	-	1	-	1	-	1	-	1	1	-	-	1	-	-	-	-	1	1	-	-	-	1	-	-	1
ANAERO1CONSENSUS	-	1	-	-	-	3	1	-	4	3	-	1	2	-	-	-	2	1	3	2	2	1	-	-	3	-	-	1	-
ANAERO2CONSENSUS	1	1	-	3	-	-	-	-	-	-	3	-	-	1	1	2	-	-	1	1	-	1	2	1	-	-	1	3	1
ANAERO3CONSENSUS	-	-	-	-	-	-	-	-	-	-	-	-	1	-	-	-	3	-	-	-	1	-	-	-	-	-	-	-	2
ANAERO4CONSENSUS	-	-	-	-	-	1	-	-	-	1	-	-	-	-	-	-	-	-	-	-	-	-	-	-	-	-	-	-	-
ANAERO5CONSENSUS	-	-	-	-	-	-	-	-	-	-	-	-	-	-	-	-	-	-	-	-	-	-	-	-	-	-	-	-	-
ARE1	-	-	-	-	-	-	1	-	-	-	-	-	-	-	1	-	-	-	-	-	-	-	-	-	-	-	-	-	-
ARFAT	-	3	-	-	-	-	-	-	-	-	-	1	1	3	-	1	-	3	2	-	1	1	-	-	1	1	1	-	1
ARR1AT	12	16	13	10	19	21	7	14	11	14	9	12	12	9	12	14	12	13	9	10	22	11	10	12	9	10	14	16	-
ASF1MOTIFCAMV	2	-	1	-	-	1	4	2	3	1	1	2	1	4	6	1	1	-	4	2	2	1	4	2	3	-	1	2	4
AUXREPSIAA4	-	-	-	-	-	-	-	-	-	-	-	-	-	-	-	-	1	-	-	-	1	-	-	-	-	-	-	-	2
AUXRETGA1GMGH3	-	-	-	-	-	-	-	-	-	-	-	-	-	-	-	-	-	-	-	-	-	-	-	-	-	-	-	-	4
AUXRETGA2GMGH3	-	-	1	-	-	-	1	-	-	-	-	-	-	-	-	-	-	-	-	-	-	-	-	-	-	-	-	-	-
BIHD1OS	11	3	3	4	7	3	4	6	3	2	1	6	4	3	8	2	3	6	5	3	-	3	1	1	5	4	7	4	-
BOXCPSAS1	-	-	2	-	-	-	-	-	-	-	-	1	-	1	-	-	1	-	-	2	-	-	-	-	-	-	-	-	-
BOXIINTPATPB	1	-	-	-	-	-	2	1	3	2	-	1	-	1	-	-	-	-	2	2	1	2	1	-	2	2	-	1	-
BOXIIPCCHS	-	-	1	-	-	1	2	1	-	1	-	1	-	1	-	-	-	-	1	1	-	-	-	-	1	1	-	-	-
BOXLCOREDCPAL	1	2	-	1	-	2	-	2	-	1	-	1	1	1	-	1	1	-	-	-	1	1	-	1	1	-	-	2	-
BP5OSWX	-	-	-	1	1	-	-	1	-	-	-	-	-	1	1	-	-	-	-	-	-	-	1	-	-	-	-	-	-
BS1EGCCR	-	1	1	-	-	2	-	-	-	-	-	-	-	1	1	-	-	-	-	-	-	1	3	-	-	1	1	-	-
CAATBOX1	16	9	12	11	15	16	7	16	21	18	16	9	17	11	10	17	9	10	10	11	6	17	6	17	13	10	17	12	1
CAATBOX2	-	-	-	-	-	-	-	-	-	-	-	-	-	-	-	-	-	-	-	-	-	-	-	-	-	-	-	-	-
CACGCAATGMGH3	-	-	-	-	-	-	-	-	-	-	-	-	-	-	-	-	-	-	-	-	-	-	-	-	-	-	-	-	5
CACGTGMOTIF	-	-	2	-	-	-	2	-	-	2	-	2	-	2	2	-	-	-	2	4	-	-	-	-	4	-	2	-	-
CACTFTPPCA1	18	24	14	22	9	16	19	15	25	20	25	26	17	29	18	25	31	19	18	18	22	20	13	17	16	23	16	17	-
CANBNNAPA	2	-	-	-	-	-	1	1	2	-	-	-	1	-	-	1	-	-	-	2	2	2	1	1	-	-	-	-	-
CAREOSREP1	1	2	-	1	3	3	-	1	-	1	-	1	1	2	-	1	1	3	-	-	1	1	-	2	1	3	-	1	5
CARGATCONSENSUS	-	-	-	-	-	-	-	-	-	-	-	-	-	-	-	-	-	-	-	-	-	-	-	-	-	-	-	-	5
CARGCW8GAT	-	-	2	2	4	2	2	2	2	2	-	-	-	-	-	4	4	4	6	2	2	-	-	-	4	4	-	2	1
CATATGGMSAUR	2	-	2	2	-	6	-	-	-	2	2	-	2	2	-	-	-	-	-	-	-	-	-	-	2	-	-	2	2
CBFHV	-	1	-	3	4	3	4	1	-	-	1	3	1	1	1	5	3	1	11	7	-	4	3	3	-	2	2	2	2
CCA1ATLHCB1	-	-	-	-	1	1	-	-	-	-	-	-	-	-	-	-	1	-	-	1	1	-	-	-	1	-	-	-	3
CCAATBOX1	2	-	1	2	1	3	3	3	4	2	5	-	3	2	2	4	1	6	4	2	1	4	-	6	3	1	5	5	-
CDA1ATCAB2	1	-	-	-	-	-	-	-	-	-	-	-	-	-	-	-	-	-	-	-	-	-	-	-	-	-	-	-	-
CELLCYCLESC	1	-	-	-	-	-	-	-	-	-	-	-	-	-	-	1	-	-	-	-	-	-	-	-	1	-	-	-	-
CEREGLUBOX1PSLEGA	-	-	-	1	-	-	-	-	1	-	-	-	-	-	-	-	-	-	-	-	-	-	-	-	-	-	-	-	1
CEREGLUBOX2PSLEGA	1	-	-	-	-	-	-	-	-	-	-	-	-	-	-	-	-	-	-	-	-	-	-	-	-	-	-	2	-
CGACGOSAMY3	2	1	1	2	-	-	4	1	-	-	4	8	2	3	3	7	2	-	7	2	1	2	4	2	-	3	6	2	-
CGCGBOXAT	2	-	-	4	4	2	20	4	-	2	4	2	-	8	10	6	2	4	18	2	10	6	16	-	4	-	-	22	1
CIACADIANLELHC	-	-	1	-	4	2	1	3	-	-	2	1	3	-	-	-	2	1	-	1	1	1	2	1	1	2	1	-	-
CMSRE1IBSPOA	1	-	-	1	-	-	1	-	-	-	-	1	1	-	-	-	-	-	-	-	1	-	-	-	1	-	-	-	-
CPBCSPOR	-	-	-	1	-	-	2	1	3	1	-	-	-	-	-	1	1	-	1	-	-	-	-	-	2	2	-	-	5
CPRFPCCHS	-	-	-	-	-	-	-	-	-	-	-	-	-	-	-	-	-	-	-	-	-	-	-	-	-	-	-	-	9
CRTDREHVCBF2	-	-	-	-	-	-	2	-	-	-	-	2	-	-	-	2	-	-	4	2	-	-	-	-	-	-	-	-	-
CTRMCAMV35S	-	-	-	-	-	-	6	-	-	-	1	-	-	-	-	-	-	-	-	1	-	-	4	-	-	-	1	-	10
CURECORECR	14	8	2	6	2	2	12	4	10	6	6	6	6	18	14	-	12	2	10	6	18	10	4	4	8	4	8	12	-
D1GMAUX28	-	-	-	-	-	-	-	-	-	-	-	-	-	-	-	-	-	-	-	-	-	-	-	-	-	-	-	-	1
DOFCOREZM	16	24	16	16	22	16	7	20	28	28	15	18	12	7	11	13	14	26	9	29	8	17	12	25	25	12	13	10	2
DPBFCOREDCDC3	3	1	3	3	4	4	-	1	1	3	1	5	4	4	4	3	2	4	3	5	4	5	1	1	3	4	4	1	-
DRE2COREZMRAB17	-	-	-	1	1	-	1	-	-	-	-	-	-	-	1	1	1	-	4	1	-	3	-	1	-	-	1	-	-
DRECRTCOREAT	-	1	-	2	1	-	2	-	-	-	1	1	1	-	1	1	1	1	7	3	-	4	3	3	-	1	2	1	1
E2F1OSPCNA	-	-	-	-	-	-	-	-	-	-	-	1	-	-	-	-	-	-	-	-	-	-	-	-	-	-	-	1	3
E2FANTRNR	-	-	-	-	-	-	-	-	-	-	-	1	-	-	-	-	-	-	-	-	-	-	-	-	-	-	-	1	1
E2FAT	-	-	-	-	-	-	-	-	-	-	-	1	-	-	-	-	-	-	-	-	-	-	-	-	-	-	-	1	1
E2FBNTRNR	-	-	-	-	-	-	-	-	-	-	-	-	-	-	-	-	-	-	-	-	-	-	-	-	-	-	-	-	3
E2FCONSENSUS	-	1	-	-	1	-	2	-	-	-	-	2	2	2	1	7	1	1	2	1	2	1	2	1	1	-	1	3	1
EBOXBNNAPA	22	10	20	10	16	16	12	16	6	20	10	10	16	22	10	12	10	12	2	8	8	8	6	16	14	14	16	18	-
EECCRCAH1	4	1	1	3	9	1	2	5	5	3	3	2	4	2	-	5	4	-	2	4	3	-	1	5	2	3	2	3	-
ELRECOREPCRP1	2	-	-	-	1	-	-	3	2	-	-	-	-	-	-	1	1	-	1	-	-	1	1	-	2	-	1	-	-
ELRENTCHN50	-	-	-	-	-	-	-	-	-	-	-	-	-	-	-	-	-	-	-	-	-	-	-	-	-	-	-	-	-
EMBP1TAEM	-	-	-	-	-	-	1	-	-	-	-	-	-	-	-	-	-	-	1	-	-	-	-	-	1	-	-	-	-
EMHVCHORD	-	-	-	-	-	-	-	-	-	-	-	-	1	-	-	-	-	-	-	-	-	-	-	-	-	-	-	-	-
ERELEE4	-	1	-	1	-	1	-	-	-	-	-	-	-	-	-	-	-	-	-	1	-	-	-	-	-	1	-	-	-
EVENINGAT	-	-	-	-	-	-	-	-	-	-	-	1	-	1	-	-	-	-	-	-	-	-	-	-	1	-	-	-	-
GADOWNAT	-	-	1	-	-	-	-	-	-	-	-	-	-	1	2	-	-	1	-	-	-	-	1	-	1	-	1	-	-
GAGA8HVBKN3	-	-	-	-	-	-	2	-	-	-	-	-	-	-	-	-	-	-	-	-	-	-	-	-	-	-	-	-	-
GAGAGMGSA1	-	-	-	-	-	-	1	-	-	-	-	-	-	-	-	-	-	-	-	-	-	-	-	-	-	-	-	-	-
GARE1OSREP1	1	-	-	-	2	1	-	-	-	-	-	-	1	-	-	-	-	-	-	2	-	-	-	-	-	-	-	-	-
GARE2OSREP1	-	-	-	-	-	-	-	-	-	1	-	-	-	-	-	-	-	-	-	-	1	-	-	-	-	-	-	-	-
GAREAT	2	1	1	-	-	2	-	2	-	1	-	1	-	1	1	-	-	1	-	-	1	2	1	1	1	-	1	-	-
GATABOX	8	4	9	8	8	9	7	10	10	9	8	7	6	13	5	9	15	9	8	10	6	12	13	10	4	12	10	6	-
GBOX10NT	-	-	-	-	-	-	-	-	-	-	-	-	-	-	-	-	-	-	1	-	-	-	-	-	-	-	-	-	-
GBOXLERBCS	-	-	-	-	-	-	-	-	-	-	-	-	-	-	-	-	-	-	-	-	-	-	-	-	1	-	-	-	-
GCAACREPEATZMZEIN	-	-	-	-	-	-	-	-	-	-	-	-	-	-	-	-	-	-	-	-	-	-	-	-	-	-	-	-	-
GCBP2ZMGAPC4	-	-	-	-	-	-	-	-	-	-	-	-	-	-	-	-	-	-	-	-	-	-	-	-	-	-	-	1	-
GCCCORE	2	2	-	1	1	-	5	-	-	-	9	-	1	2	-	-	1	1	6	-	4	-	3	-	-	-	-	4	-
GCN4OSGLUB1	-	1	1	-	-	-	-	-	-	-	-	-	-	-	-	1	-	-	-	-	1	-	-	-	1	-	-	-	-
GGTCCCATGMSAUR	-	-	-	-	-	-	-	-	-	-	-	-	-	-	-	-	1	-	-	-	-	-	-	-	-	-	-	-	-
GLMHVCHORD	-	-	-	-	-	-	-	-	-	-	-	-	-	-	-	-	-	-	-	-	-	-	-	-	1	-	-	-	-
GT1CONSENSUS	10	5	4	5	11	11	4	9	14	13	7	15	10	8	5	13	14	26	9	13	6	9	7	8	18	10	6	8	-
GT1CORE	-	-	-	-	1	2	-	-	-	-	1	2	-	1	-	-	-	-	-	1	1	2	1	-	-	-	-	-	-
GT1GMSCAM4	3	3	-	2	4	8	-	1	6	5	1	4	3	1	2	5	5	7	2	5	2	1	3	4	9	3	2	2	-
GT1MOTIFPSRBCS	-	-	-	-	-	-	-	-	-	-	-	-	1	-	-	-	-	-	-	-	-	-	-	-	-	-	-	1	-
GTGANTG10	8	7	8	5	12	11	9	9	12	11	9	4	13	12	5	11	12	6	14	13	13	7	6	9	13	11	10	9	-
HBOXCONSENSUSPVCHS	-	-	-	-	-	-	-	-	-	-	-	-	-	-	-	-	-	-	-	-	-	-	-	-	-	-	-	-	-
HDZIP2ATATHB2	-	-	-	-	-	-	-	-	-	1	-	-	-	1	-	-	-	-	-	1	-	-	-	-	-	-	-	-	-
HEXAMERATH4	1	-	-	-	-	-	2	-	-	-	-	2	-	1	-	1	1	-	3	-	-	1	1	1	-	-	2	-	-
HEXAT	-	-	1	-	-	-	1	-	-	-	-	-	-	1	-	-	-	-	-	-	-	-	-	-	-	-	-	-	-
HEXMOTIFTAH3H4	-	-	1	-	-	1	1	1	-	-	-	-	-	1	-	-	-	-	-	-	-	-	-	-	1	-	1	2	-
HSELIKENTACIDICPR1	-	-	-	-	-	-	-	-	-	-	-	-	-	-	-	-	-	-	-	-	-	-	-	-	-	-	-	-	-
IBOX	-	-	-	-	-	-	1	-	-	-	-	1	1	-	-	1	-	-	1	-	-	2	2	-	1	1	-	-	-
IBOXCORE	2	1	3	1	4	-	3	4	4	2	2	3	1	3	1	4	4	5	3	1	2	3	3	1	1	4	2	2	-
IBOXCORENT	-	-	-	-	-	-	-	-	-	-	-	-	-	-	-	-	-	-	1	-	-	1	-	-	1	-	-	-	-
INRNTPSADB	1	-	3	4	-	-	-	4	1	3	3	1	3	5	1	2	3	1	3	3	2	3	-	1	5	2	1	3	-
INTRONLOWER	1	2	2	1	-	-	-	-	-	1	-	1	2	2	7	-	-	-	-	3	2	-	2	2	-	-	-	-	-
IRO2OS	-	-	1	-	-	-	1	-	-	1	-	-	-	-	-	-	-	-	1	-	-	-	-	-	1	-	1	-	-
L1BOXATPDF1	-	-	-	-	-	-	-	-	1	1	-	-	-	-	-	-	-	-	-	-	-	-	-	-	-	-	-	-	-
LBOXLERBCS	-	-	-	-	-	-	-	-	-	-	-	-	-	-	-	-	-	-	-	-	-	-	-	-	-	-	-	-	-
LEAFYATAG	-	-	-	-	-	-	-	-	-	-	-	-	-	-	-	-	-	3	1	-	-	1	-	-	-	-	1	1	-
LECPLEACS2	-	1	-	-	1	-	-	-	-	1	-	-	-	-	-	-	1	2	-	-	-	-	-	-	-	1	-	-	-
LRENPCABE	-	-	-	-	-	-	-	-	-	-	-	-	-	-	-	-	-	-	-	-	-	-	-	-	-	1	-	-	-
LTRE1HVBLT49	-	1	2	-	-	-	-	-	-	3	-	1	1	1	-	3	3	-	-	-	1	-	1	1	-	1	-	-	-
LTREATLTI78	-	-	-	1	-	-	-	-	-	-	-	-	-	-	-	-	-	-	-	-	-	1	-	1	-	-	-	-	-
LTRECOREATCOR15	1	5	3	4	2	-	4	-	-	-	4	3	3	1	1	3	5	1	8	5	1	5	6	4	-	3	2	2	-
MARABOX1	-	1	-	-	1	-	-	-	-	-	-	-	-	-	-	-	1	-	-	-	-	-	-	-	-	-	-	-	-
MARARS	-	-	-	-	-	1	-	-	-	-	-	-	-	-	-	-	-	-	-	-	-	-	-	-	-	-	-	-	-
MARTBOX	-	-	-	-	1	1	-	-	-	1	-	2	-	2	-	1	1	-	-	2	-	-	-	-	-	-	-	-	-
MNF1ZMPPC1	-	-	-	-	-	-	-	-	-	-	-	-	-	-	-	-	-	-	-	-	-	-	-	-	-	-	-	-	-
MSACRCYM	1	-	-	-	-	-	-	-	-	-	-	-	-	-	-	-	-	-	-	-	-	-	-	-	-	-	-	-	-
MYB1AT	5	-	3	4	2	2	1	-	4	3	2	1	1	2	1	1	2	2	2	2	4	1	1	1	1	3	3	3	-
MYB1LEPR	1	-	-	-	-	-	-	-	-	-	-	-	-	-	2	-	-	-	-	-	-	-	-	-	-	-	-	-	-
MYB26PS	-	-	-	-	-	-	-	-	-	1	-	-	-	-	-	-	-	-	-	-	-	-	-	-	-	-	-	-	-
MYB2AT	-	-	-	1	1	1	2	-	1	-	-	-	2	-	-	-	1	-	2	-	1	-	1	-	-	-	-	-	-
MYB2CONSENSUSAT	1	2	2	2	4	2	4	1	1	3	-	1	2	2	3	-	3	3	3	-	6	1	4	2	2	3	3	5	-
MYBATRD22	-	-	-	1	-	-	-	-	-	2	1	-	1	-	-	-	-	-	-	1	-	-	-	-	-	-	1	-	-
MYBCORE	3	4	6	5	10	7	6	5	1	3	1	4	5	7	5	1	4	5	3	4	10	5	5	3	5	4	5	9	-
MYBCOREATCYCB1	1	3	-	3	1	-	2	1	2	1	1	2	1	2	4	1	1	4	1	1	5	-	4	2	5	3	2	1	-
MYBGAHV	1	-	1	-	-	1	-	2	-	-	-	1	-	1	-	-	-	1	-	-	1	1	-	-	1	-	-	-	-
MYBPLANT	-	1	-	-	-	1	-	2	1	3	-	-	1	1	-	-	-	1	-	1	1	-	-	-	-	-	-	1	-
MYBPZM	-	1	1	2	1	3	1	2	1	3	4	2	1	5	-	1	2	-	1	2	2	1	1	-	1	1	-	1	-
MYBST1	2	2	1	2	3	5	3	2	-	2	1	4	1	5	2	1	-	6	2	4	2	3	6	2	1	2	3	1	-
MYCATERD1	7	1	1	1	1	1	-	2	-	1	-	2	1	5	-	-	1	2	-	1	-	-	-	3	-	2	1	-	-
MYCATRD22	7	1	1	1	1	1	-	2	-	1	-	2	1	5	-	-	1	2	-	1	-	-	-	3	-	2	1	-	-
MYCCONSENSUSAT	22	10	20	10	16	16	12	16	6	20	10	10	16	22	10	12	10	12	2	8	8	8	6	16	14	14	16	18	-
NAPINMOTIFBN	-	1	-	-	1	-	-	-	-	-	-	-	-	-	-	-	-	-	-	-	-	-	-	-	1	-	-	-	-
NODCON1GM	3	1	1	1	1	3	-	3	2	2	1	4	1	-	2	-	2	-	2	4	1	1	-	-	2	1	-	1	-
NODCON2GM	2	4	5	4	2	3	5	4	2	5	6	7	1	3	1	10	2	3	1	1	3	4	2	3	4	2	6	5	-
NONAMERATH4	-	-	-	-	-	-	-	-	-	-	-	-	-	-	-	-	-	-	-	-	-	-	-	-	-	-	-	-	-
NONAMERMOTIFTAH3H4	-	-	-	-	-	-	-	1	-	-	-	-	-	-	-	-	-	-	-	-	-	-	-	-	-	-	-	-	-
NRRBNEXTA	-	-	-	-	-	-	-	-	-	-	-	-	-	-	-	-	-	-	-	-	-	-	-	-	-	-	-	-	-
NTBBF1ARROLB	1	1	-	1	1	-	-	-	3	1	-	-	2	1	-	1	1	2	-	1	-	-	-	1	1	-	-	1	-
OCTAMERMOTIFTAH3H4	-	-	-	-	-	-	1	-	-	-	-	-	-	-	-	-	-	-	-	-	-	-	-	-	-	-	-	1	-
OCTAMOTIF2	-	-	-	-	-	-	-	-	-	-	-	-	-	-	-	-	-	-	-	-	-	-	-	-	-	-	-	-	-
OPAQUE2ZMB32	-	-	-	-	-	-	-	-	-	-	-	-	1	-	-	-	-	-	-	-	-	-	-	-	-	-	-	-	-
OSE1ROOTNODULE	3	1	1	1	1	3	-	3	2	2	1	4	1	-	2	-	2	-	2	4	1	1	-	-	2	1	-	1	-
OSE2ROOTNODULE	2	4	5	4	2	3	5	4	2	5	6	7	1	3	1	10	2	3	1	1	3	4	2	3	4	2	6	5	-
P1BS	2	-	-	6	-	4	-	2	-	4	2	-	-	4	-	-	-	-	-	-	-	4	4	2	-	4	-	2	-
PALBOXAPC	1	2	-	3	2	1	5	-	-	-	1	1	1	-	-	-	-	-	1	-	1	-	1	3	1	2	2	-	-
PALBOXPPC	-	-	-	-	-	-	-	-	-	-	-	-	-	-	-	-	-	-	-	-	-	-	-	-	-	-	-	-	-
PALINDROMICCBOXGM	-	-	-	-	-	-	-	-	-	-	-	-	-	-	-	-	-	-	-	-	-	-	-	-	-	-	-	2	-
PE2FNTRNR1A	-	-	-	-	-	-	-	-	-	-	-	-	-	-	-	-	-	-	-	-	-	-	-	-	-	-	-	-	-
POLASIG1	3	5	3	3	5	1	1	2	3	-	-	1	4	1	-	1	6	3	3	2	1	1	3	4	4	1	-	4	-
POLASIG2	1	-	1	-	3	-	-	1	-	-	-	-	-	1	-	-	-	2	1	-	-	2	-	1	-	1	-	1	-
POLASIG3	-	1	-	-	6	1	-	2	1	2	3	3	2	3	2	3	4	2	2	5	-	-	-	1	3	1	1	3	-
POLLEN1LELAT52	8	5	2	5	12	6	3	8	9	2	1	7	7	1	8	4	9	16	5	12	7	8	4	8	11	2	3	5	-
PREATPRODH	-	1	1	1	-	1	-	-	-	1	-	-	-	1	-	-	2	4	-	1	-	1	-	-	2	-	2	1	-
PRECONSCRHSP70A	1	1	5	3	2	1	1	-	1	-	1	6	2	1	-	3	3	-	9	1	2	1	3	4	-	-	3	2	-
PROLAMINBOXOSGLUB1	-	-	-	2	1	1	-	-	1	1	-	-	-	-	-	2	-	-	-	-	-	-	-	-	2	-	-	-	-
PROXBBNNAPA	1	-	-	-	-	-	-	-	2	-	-	-	-	-	-	-	-	-	-	-	1	-	-	-	-	-	-	-	-
PYRIMIDINEBOXHVEPB1	-	-	-	-	-	-	-	1	-	-	-	-	1	-	-	-	-	1	-	-	-	-	-	1	-	-	-	-	-
PYRIMIDINEBOXOSRAMY1A	-	-	4	1	2	1	-	-	-	2	-	-	1	1	-	1	1	1	-	5	-	2	1	4	4	-	3	1	-
QARBNEXTA	-	-	-	-	-	-	-	-	-	-	-	1	-	1	-	-	-	-	-	-	-	-	1	-	-	-	-	-	-
QELEMENTZMZM13	-	-	-	-	1	-	-	1	-	1	1	-	1	1	-	-	-	-	-	-	-	4	-	-	-	2	1	-	-
RAV1AAT	4	7	5	12	2	10	4	5	4	8	2	3	7	2	2	3	8	-	2	5	6	4	5	1	9	6	2	5	-
RAV1BAT	1	-	-	-	-	-	-	1	-	1	2	-	-	1	3	1	-	1	-	-	2	-	-	1	-	-	1	3	-
RBCSCONSENSUS	-	-	2	1	-	-	-	-	-	-	1	-	-	-	-	2	2	-	-	-	-	-	-	-	-	-	-	-	-
RBCSGBOXPS	-	-	-	-	-	1	-	-	-	-	-	-	-	-	-	-	-	-	-	-	-	-	-	-	-	-	-	-	-
REALPHALGLHCB21	3	-	3	1	1	1	-	-	4	2	-	1	2	2	1	1	1	4	3	-	4	1	-	-	2	-	2	2	-
REBETALGLHCB21	-	-	-	-	1	2	2	-	-	-	-	1	-	-	-	-	-	-	1	-	-	-	2	-	-	-	-	-	-
RGATAOS	-	-	-	-	-	-	-	-	-	-	-	-	1	-	-	-	-	-	-	-	-	-	-	-	-	-	-	-	-
RHERPATEXPA7	2	-	1	2	4	3	2	3	-	1	1	1	1	3	2	1	3	1	5	5	2	1	5	2	-	1	3	1	-
ROOTMOTIFTAPOX1	1	4	5	1	11	7	5	8	9	5	4	2	2	7	-	3	5	6	4	7	-	3	3	7	8	12	1	-	-
RYREPEATBNNAPA	6	1	-	2	3	1	-	2	8	2	-	-	3	-	1	1	-	-	-	1	-	5	-	4	1	2	-	-	-
RYREPEATGMGY2	2	-	-	-	-	-	-	-	7	-	-	-	2	-	-	1	-	-	-	1	-	2	-	-	-	-	-	-	-
RYREPEATLEGUMINBOX	4	-	-	-	1	-	-	-	8	-	-	-	2	-	-	1	-	-	-	1	-	4	-	1	-	-	-	-	-
RYREPEATVFLEB4	-	-	-	-	-	-	-	-	4	-	-	-	2	-	-	-	-	-	-	-	-	-	-	-	-	-	-	-	-
S1FBOXSORPS1L21	-	1	-	-	-	2	-	-	1	-	-	1	2	1	1	-	2	-	-	-	2	-	1	1	-	1	-	-	-
S1FSORPL21	-	-	-	-	-	-	-	-	1	-	-	-	-	-	-	-	-	-	-	-	-	-	1	-	-	-	-	-	-
S2FSORPL21	-	-	-	-	-	-	-	-	-	-	-	-	-	-	-	-	-	-	-	-	-	-	-	-	-	-	-	-	-
SBOXATRBCS	-	-	-	-	-	-	-	-	-	-	-	-	-	-	-	-	-	1	-	-	1	-	-	-	-	-	2	-	-
SEBFCONSSTPR10A	1	2	-	-	-	-	3	-	-	1	-	1	-	2	-	-	1	1	3	1	1	-	-	-	-	1	-	-	-
SEF1MOTIF	-	-	1	-	-	-	-	-	-	-	-	-	-	1	-	-	2	-	1	-	-	-	-	-	-	1	-	-	-
SEF3MOTIFGM	-	1	2	-	1	-	-	-	-	-	1	-	2	-	3	2	-	-	1	1	-	1	2	1	2	-	-	-	-
SEF4MOTIFGM7S	2	-	1	1	6	1	-	-	3	3	1	2	-	3	-	2	3	3	2	2	2	2	1	-	6	2	2	3	-
SITEIIAOSPCNA	-	-	-	1	-	-	-	1	-	-	-	-	-	-	-	-	-	-	-	-	-	-	-	-	-	-	-	-	-
SITEIIATCYTC	1	2	2	3	-	1	-	1	-	2	1	-	1	4	2	1	-	1	1	4	2	2	2	1	1	1	1	3	-
SITEIOSPCNA	-	-	-	-	-	-	-	-	-	-	-	-	-	-	-	-	-	-	-	-	1	-	-	-	-	-	-	-	-
SORLIP1AT	7	3	4	2	2	1	4	1	1	4	4	5	2	4	4	4	2	-	3	6	3	4	1	1	4	7	3	4	-
SORLIP2AT	3	1	4	6	2	3	2	2	-	-	1	-	2	2	5	4	4	3	7	5	1	-	8	1	2	1	4	8	-
SORLIP3AT	-	-	-	-	-	-	-	-	-	-	-	-	-	-	-	-	-	-	-	-	-	-	-	-	-	1	-	-	-
SORLIP5AT	-	-	-	-	-	-	-	-	-	-	1	-	-	1	-	1	-	-	-	1	1	-	-	-	1	-	-	-	-
SORLREP2AT	-	-	-	-	-	1	-	-	-	-	-	-	-	-	-	-	-	-	-	-	-	-	-	-	-	-	-	-	-
SORLREP3AT	-	-	-	-	1	-	-	-	-	-	-	1	-	1	-	-	-	-	-	-	-	-	-	-	-	-	-	-	-
SORLREP4AT	-	-	-	-	-	-	-	-	-	-	1	-	-	-	-	-	-	-	-	-	-	-	-	-	-	-	-	-	-
SP8BFIBSP8AIB	-	-	-	-	-	-	-	-	-	1	-	-	-	-	-	-	-	-	-	-	-	-	-	-	-	-	-	-	-
SP8BFIBSP8BIB	-	-	1	-	1	-	-	-	2	-	1	2	-	-	-	-	-	-	1	-	1	-	-	-	-	-	-	-	-
SPHCOREZMC1	-	-	-	-	-	-	-	-	-	-	-	-	1	-	-	-	-	-	-	-	-	1	-	-	-	-	-	-	-
SREATMSD	-	1	1	-	2	-	1	1	-	-	1	3	-	1	-	-	-	3	-	-	-	1	1	-	1	-	1	1	-
SURE1STPAT21	-	-	-	-	-	-	-	-	1	-	-	-	-	1	-	-	-	-	-	-	-	-	-	-	-	-	-	-	-
SURE2STPAT21	-	1	-	-	-	-	-	-	-	-	-	-	-	-	-	-	-	-	-	-	-	-	-	-	-	-	-	-	-
SURECOREATSULTR11	-	4	4	3	1	3	-	1	2	1	1	5	3	6	-	1	2	3	2	1	2	3	-	2	1	2	3	3	-
SV40COREENHAN	2	-	2	-	-	-	-	1	-	-	2	-	-	-	2	-	-	-	-	-	6	2	-	-	-	1	-	1	-
T/GBOXATPIN2	-	-	-	2	2	1	-	1	-	1	-	1	-	2	1	-	1	-	3	-	1	-	3	1	1	-	1	-	-
TAAAGSTKST1	3	3	1	3	1	1	1	5	4	7	5	4	4	2	1	2	2	2	2	4	1	4	2	1	4	3	-	5	-
TATABOX2	-	-	2	-	-	-	-	2	-	-	-	-	-	-	-	1	1	-	2	-	-	-	-	1	-	1	-	-	-
TATABOX3	-	-	-	1	-	-	-	-	-	-	-	-	-	1	-	-	-	-	-	1	-	-	-	-	-	1	-	-	-
TATABOX4	1	-	-	-	-	1	-	-	-	-	-	-	-	1	-	-	2	-	1	-	-	-	1	-	1	-	-	1	-
TATABOX5	2	3	1	1	7	1	3	4	2	2	2	2	2	2	1	1	7	3	1	6	1	1	2	4	4	1	-	1	-
TATABOXOSPAL	-	-	1	1	1	1	-	-	-	-	-	-	-	1	-	-	-	2	1	1	-	-	1	1	1	-	-	-	-
TATAPVTRNALEU	1	-	-	-	-	1	-	-	-	-	-	-	-	1	-	-	1	-	1	-	-	-	-	-	-	-	-	-	-
TATCCACHVAL21	1	-	-	-	1	1	-	-	-	1	-	-	-	1	-	-	-	-	-	-	-	-	-	-	-	-	1	-	-
TATCCAOSAMY	2	1	-	1	1	2	-	1	-	2	-	1	1	1	-	1	-	2	-	1	1	1	-	1	1	2	2	-	-
TATCCAYMOTIFOSRAMY3D	2	-	-	1	1	2	-	1	-	2	-	1	1	1	-	1	-	-	-	-	1	1	-	-	-	1	1	-	-
TBOXATGAPB	1	2	1	1	2	-	-	-	3	1	2	-	-	2	-	1	1	-	1	-	1	1	1	-	3	-	-	-	-
TCA1MOTIF	-	-	-	-	-	-	-	-	-	-	-	-	-	-	-	-	-	-	-	-	-	-	-	-	-	-	-	-	-
TE2F2NTPCNA	-	-	-	-	-	-	-	-	-	-	-	-	-	-	-	1	-	-	-	-	-	-	-	-	-	-	-	-	-
TELOBOXATEEF1AA1	-	-	-	-	-	-	-	-	-	-	-	1	-	-	-	-	-	-	-	-	-	-	-	-	-	-	-	-	-
TGACGTVMA	-	-	-	-	-	-	-	-	-	-	-	-	-	-	-	-	-	-	-	-	-	-	-	-	-	-	-	-	-
TGACGTVMAMY	-	-	1	-	-	1	1	1	-	-	-	-	-	1	-	-	-	-	-	-	-	-	-	-	1	-	1	2	-
TGTCACACMCUCUMISIN	-	1	-	1	-	-	1	-	-	1	-	-	1	1	-	-	1	-	-	1	-	-	-	-	-	-	-	1	-
TL1ATSAR	-	-	-	-	-	-	-	-	-	-	-	-	-	-	-	-	-	-	-	-	-	-	-	-	-	-	-	-	-
TOPOISOM	-	-	-	-	-	-	-	-	-	-	-	-	-	-	-	-	-	-	-	-	-	-	-	-	-	-	-	-	-
UP1ATMSD	-	-	-	-	-	-	-	-	-	-	-	-	-	-	1	-	-	-	-	-	-	-	-	-	-	1	-	1	-
UP2ATMSD	-	-	-	-	-	-	1	-	-	-	-	1	-	-	-	-	-	-	-	-	-	-	1	-	-	-	-	1	-
UPRMOTIFIAT	-	-	1	-	-	-	1	-	-	-	-	-	-	1	-	-	-	-	-	-	-	-	-	-	-	-	-	-	-
UPRMOTIFIIAT	-	-	1	-	-	1	1	-	-	-	1	-	-	-	1	-	-	-	-	-	-	1	-	-	-	1	-	-	-
VSF1PVGRP18	-	-	-	-	-	-	-	-	-	-	-	-	-	-	-	-	-	-	-	-	-	-	-	-	-	1	-	-	-
WBBOXPCWRKY1	1	1	-	-	2	-	-	3	4	1	-	-	-	-	1	-	1	2	1	-	-	-	1	1	2	-	-	-	-
WBOXATNPR1	9	3	1	-	11	2	3	6	5	4	2	3	1	2	3	1	3	5	4	3	1	3	2	2	6	1	3	-	-
WBOXHVISO1	4	3	2	1	5	2	2	1	3	4	2	2	1	1	3	3	2	4	2	3	2	2	3	5	3	2	1	1	-
WBOXNTCHN48	1	-	-	1	-	1	2	1	-	1	-	1	1	1	2	-	1	1	1	1	1	2	-	3	1	2	-	1	-
WBOXNTERF3	7	3	2	2	7	2	2	7	7	5	3	2	3	3	3	4	4	5	3	4	3	10	6	5	6	7	4	2	-
WRECSAA01	-	-	-	-	-	-	-	-	-	-	-	-	-	-	-	-	1	-	-	-	-	-	-	-	-	-	-	-	-
WRKY71OS	20	6	6	6	14	6	10	15	13	8	5	10	8	10	17	7	8	11	12	9	5	14	11	8	14	11	12	8	-
WUSATAg	-	-	-	-	1	-	-	-	1	-	1	-	-	-	1	-	-	-	-	-	1	-	-	1	-	-	-	-	-
XYLAT	-	-	-	-	-	-	-	2	-	1	-	-	-	-	-	-	-	1	-	1	-	-	-	-	-	-	-	-	-
ZDNAFORMINGATCAB1	-	-	-	-	-	-	-	-	-	-	-	-	-	-	-	-	-	1	-	-	-	-	-	-	-	-	-	-	-

## Sheet: Additional file 5
Additional file 5. Annotations of putative AetATGs cis-acting regulatory DNA elements identified in PLACE
Cis-element	Aet4D_ATG1a	Aet6D_ATG2a	Aet7D_ATG2b	Aet1D_ATG3a	Aet2D_ATG4a	Aet6D_ATG5a	Aet3D_ATG6a	Aet2D_ATG7a	Aet3D_ATG7b	Aet2D_ATG8a	Aet2D_ATG8b	Aet5D_ATG8c	Aet4D_ATG9a	Aet2D_ATG10a	Aet6D_ATG11a	Aet6D_ATG12a	Aet6D_ATG12b	Aet7D_ATG12c	Aet2D_ATG13a	Aet4D_ATG13b	Aet6D_ATG13c	Aet5D_ATG14a	Aet5D_ATG16a	Aet1D_ATG18a	Aet3D_ATG18b	Aet3D_ATG18c	Aet6D_ATG18d	Aet3D_ATG22a	Aet4D_ATG27a	Aet2D_ATG101a
-10PEHVPSBD	-	1	2	1	3	-	2	1	2	-	1	-	-	2	2	7	-	-	1	2	-	-	1	-	-	-	1	-	1	1
-300CORE	1	-	-	1	-	-	1	-	-	-	-	-	-	-	-	-	-	-	-	-	-	-	-	-	-	-	-	-	-	1
-300ELEMENT	4	2	2	2	1	1	-	1	1	1	2	-	-	-	3	1	-	-	2	-	-	-	-	-	-	-	1	1	-	1
-300MOTIFZMZEIN	-	-	-	-	-	-	-	-	-	-	-	-	-	-	-	-	-	-	-	-	-	-	-	-	-	-	-	-	-	-
2SSEEDPROTBANAPA	2	-	-	-	-	-	-	-	-	-	-	-	1	1	1	1	1	-	2	-	-	-	-	-	1	-	-	-	-	-
5659BOXLELAT5659	-	-	-	-	-	-	-	-	-	-	-	-	-	-	-	-	-	-	-	-	-	-	-	-	-	-	-	-	-	-
AACACOREOSGLUB1	2	1	-	1	-	-	-	-	1	1	1	-	-	-	-	-	-	-	-	1	-	-	-	-	-	1	-	-	-	1
ABREATCONSENSUS	-	-	-	-	-	-	-	-	1	-	-	-	-	-	-	-	-	-	1	-	-	-	-	-	1	-	2	-	1	-
ABREATRD22	-	-	-	-	-	-	-	-	-	-	-	-	-	-	-	-	-	-	-	-	-	-	-	-	1	-	1	-	-	-
ABREAZMRAB28	-	-	-	-	-	-	-	-	-	-	-	-	-	-	-	-	-	-	-	-	-	-	-	-	-	-	-	-	1	-
ABRECE1HVA22	-	-	-	-	-	-	-	-	-	-	-	-	-	-	-	-	-	-	-	-	-	-	-	-	-	-	-	-	-	-
ABRELATERD1	2	2	2	-	2	2	-	1	3	4	2	-	1	4	-	1	3	-	6	3	3	1	6	5	4	1	7	2	6	-
ABREMOTIFAOSOSEM	-	-	-	-	-	-	-	-	-	-	-	-	-	-	-	-	1	-	-	-	-	-	-	-	-	-	-	-	1	-
ABREOSRAB21	-	1	-	-	-	1	-	1	-	-	-	-	-	1	-	-	-	-	-	-	3	-	1	2	-	-	-	-	1	-
ABRERATCAL	1	3	1	-	-	-	-	-	2	3	3	-	2	-	-	1	3	-	2	2	3	1	8	3	3	1	5	-	6	1
ABREZMRAB28	-	-	-	-	-	-	-	-	-	-	-	-	-	-	-	-	-	-	-	-	-	-	-	-	-	-	-	-	2	-
ACGTABOX	-	2	-	-	-	-	-	-	-	2	2	-	-	2	-	4	2	2	2	-	-	-	-	-	-	-	-	-	-	2
ACGTABREMOTIFA2OSEM	-	-	-	-	-	-	-	-	2	-	-	-	-	1	-	-	1	-	1	1	-	-	-	1	1	1	2	1	3	-
ACGTABREMOTIFAOSOSEM	-	-	-	-	-	-	-	-	-	-	-	-	-	-	-	-	1	-	-	-	-	-	-	-	-	-	-	-	1	-
ACGTATERD1	4	10	10	4	6	12	-	2	8	8	4	-	10	10	4	8	12	4	14	4	14	2	8	12	8	2	10	4	16	6
ACGTCBOX	-	-	-	-	-	-	-	-	-	-	-	-	-	-	-	-	-	-	-	-	6	-	-	-	-	-	-	-	-	2
ACGTOSGLUB1	-	-	-	-	1	-	-	-	-	-	-	-	-	-	-	-	1	-	2	-	-	-	-	-	1	-	-	-	1	-
ACGTTBOX	-	2	-	-	-	-	-	-	-	-	-	-	-	-	-	-	-	-	-	-	2	-	-	2	-	-	-	-	-	-
ACIIIPVPAL2	-	-	-	-	-	-	-	-	-	-	1	-	-	-	-	-	-	-	-	-	1	-	-	-	-	-	-	-	-	-
AGATCONSENSUS	-	-	-	-	-	-	-	-	-	-	-	-	-	-	-	-	-	-	-	-	-	-	-	-	-	-	-	-	-	-
AGCBOXNPGLB	1	-	-	-	-	1	-	1	-	-	-	1	-	-	-	-	-	-	-	-	1	-	-	-	-	1	-	-	-	-
AGL2ATCONSENSUS	-	-	-	-	-	-	-	-	-	-	-	-	-	-	-	-	-	-	-	-	-	-	-	-	-	-	-	-	-	-
AGMOTIFNTMYB2	-	-	-	-	-	-	-	1	-	-	-	-	-	-	-	-	-	-	1	-	-	-	-	-	-	-	-	-	-	-
AMMORESIIUDCRNIA1	-	-	-	-	-	-	-	-	-	-	1	-	1	-	-	-	-	-	-	-	-	-	-	-	-	-	-	-	-	-
AMMORESIVDCRNIA1	-	1	-	-	-	-	-	-	-	-	-	-	-	-	-	-	1	-	-	-	-	-	-	-	-	-	-	-	-	-
AMMORESVDCRNIA1	-	-	-	-	-	-	-	-	-	-	-	-	-	-	-	-	-	-	-	-	-	-	-	-	-	-	-	-	-	-
AMYBOX1	1	1	1	1	-	-	-	-	2	3	-	-	-	-	-	-	-	1	-	1	-	1	-	-	-	-	-	1	-	-
AMYBOX2	-	1	-	-	1	-	-	-	1	-	-	-	-	-	-	-	-	1	-	-	-	-	-	-	1	-	2	1	-	-
ANAERO1CONSENSUS	2	2	1	1	2	-	1	1	-	2	3	-	-	3	-	3	-	-	2	1	1	1	-	-	-	-	-	-	-	-
ANAERO2CONSENSUS	5	1	-	2	-	-	1	-	1	-	2	2	-	-	-	1	2	2	-	-	-	-	2	2	1	2	1	1	-	3
ANAERO3CONSENSUS	1	-	-	-	-	1	1	-	-	1	-	-	-	-	1	-	-	-	-	-	-	-	-	-	-	-	1	-	-	-
ANAERO4CONSENSUS	1	-	-	-	-	-	-	-	-	1	1	-	-	-	-	-	-	1	-	-	-	-	-	-	-	-	-	-	-	-
ANAERO5CONSENSUS	-	-	-	-	-	-	-	-	-	-	-	-	-	-	-	-	-	-	-	-	-	-	-	-	-	-	-	-	-	-
ARE1	-	-	-	-	-	-	-	-	-	-	-	-	-	-	-	-	1	-	-	-	-	-	-	-	-	-	1	-	-	-
ARFAT	1	1	1	2	1	-	-	-	-	-	-	2	-	-	-	-	-	1	2	3	1	2	-	-	1	-	1	-	1	-
ARR1AT	14	10	14	12	14	12	13	8	13	13	13	4	10	15	19	9	12	16	7	9	8	16	7	10	3	5	6	11	8	15
ASF1MOTIFCAMV	3	1	1	2	2	2	-	2	1	3	2	1	3	4	1	-	4	1	2	3	1	1	-	2	4	4	-	-	-	2
AUXREPSIAA4	-	-	-	-	-	-	-	-	-	-	-	-	-	-	-	-	-	-	-	-	-	-	-	-	2	-	-	-	-	-
AUXRETGA1GMGH3	-	-	-	1	-	-	-	-	-	-	-	-	-	-	1	-	-	-	-	-	-	-	-	-	-	-	-	-	-	-
AUXRETGA2GMGH3	-	-	-	-	-	-	-	-	-	-	-	-	-	-	-	-	-	-	-	-	-	-	-	-	-	-	-	-	-	-
BIHD1OS	5	3	2	6	2	1	7	5	3	3	2	4	3	1	11	5	8	1	5	8	3	1	5	2	2	6	2	5	3	5
BOXCPSAS1	-	-	-	-	-	-	-	-	-	1	1	1	-	1	1	-	-	-	1	-	-	1	1	-	-	-	-	1	2	-
BOXIINTPATPB	1	1	1	2	-	-	3	1	1	1	2	-	-	2	6	3	-	1	1	-	1	3	2	-	1	-	1	2	-	1
BOXIIPCCHS	-	-	-	-	-	-	-	-	2	-	-	-	-	-	-	-	-	-	1	1	-	-	-	-	1	-	2	1	1	-
BOXLCOREDCPAL	1	-	2	-	-	1	-	2	1	-	-	-	-	-	-	-	-	-	-	1	2	1	-	1	-	-	1	1	-	2
BP5OSWX	-	-	-	-	-	-	-	-	-	-	-	-	-	-	-	-	1	-	-	-	-	1	1	1	-	1	-	-	-	-
BS1EGCCR	1	-	-	-	1	-	-	-	-	-	-	-	-	-	-	-	1	-	-	-	-	-	1	1	3	-	-	2	1	-
CAATBOX1	9	11	17	18	14	13	11	18	14	19	22	11	11	14	21	24	10	23	6	13	5	16	13	6	9	17	11	6	12	14
CAATBOX2	-	-	-	-	-	-	-	-	-	-	-	-	-	-	-	-	-	-	-	-	-	-	-	-	-	-	-	-	-	-
CACGCAATGMGH3	-	-	-	1	-	-	-	-	-	1	-	-	-	-	-	-	-	-	-	-	-	-	-	-	-	-	-	-	-	-
CACGTGMOTIF	-	2	-	-	-	-	-	-	-	2	2	-	-	-	-	-	-	-	2	2	-	-	4	-	2	-	4	-	4	-
CACTFTPPCA1	15	23	19	17	23	14	37	22	18	23	17	23	15	16	41	16	27	17	17	15	20	35	12	14	17	12	20	15	25	16
CANBNNAPA	2	3	1	-	1	2	-	1	-	-	-	1	2	2	1	2	1	1	2	-	1	1	1	-	2	-	-	1	-	-
CAREOSREP1	1	1	1	3	-	-	1	1	2	2	1	-	2	-	-	-	-	-	1	-	-	1	1	3	1	2	1	1	6	1
CARGATCONSENSUS	-	-	-	-	-	-	-	-	-	-	-	-	-	-	-	-	-	4	-	-	-	-	-	-	2	-	-	-	-	-
CARGCW8GAT	-	-	4	-	-	2	-	4	2	2	4	-	-	2	12	4	-	2	2	2	2	4	-	2	2	2	4	4	2	2
CATATGGMSAUR	-	-	2	6	2	-	-	-	2	6	2	2	-	-	2	-	-	2	2	2	2	-	-	2	-	-	4	-	2	-
CBFHV	2	2	1	-	1	4	-	1	2	2	2	2	10	3	1	2	2	1	4	6	6	-	4	3	5	-	1	1	4	2
CCA1ATLHCB1	-	1	-	-	-	-	-	1	-	-	-	-	-	1	-	1	-	-	1	-	-	1	-	-	-	-	1	-	-	-
CCAATBOX1	1	2	4	2	4	1	2	3	1	3	4	5	4	2	4	4	2	5	2	2	2	2	3	3	3	4	3	-	3	5
CDA1ATCAB2	-	-	1	-	-	-	-	-	-	-	-	-	-	-	-	-	-	-	-	-	-	-	-	-	-	-	-	-	-	-
CELLCYCLESC	-	-	-	-	-	-	-	-	-	-	-	-	1	-	-	-	-	-	-	-	-	-	-	-	-	-	-	-	-	-
CEREGLUBOX1PSLEGA	-	-	-	-	-	-	-	-	-	-	-	-	-	-	-	-	-	-	-	-	-	-	-	-	-	-	-	-	-	-
CEREGLUBOX2PSLEGA	-	-	-	-	-	-	-	-	-	-	-	-	-	-	-	-	-	-	-	-	-	1	-	-	-	-	-	-	-	1
CGACGOSAMY3	4	4	2	2	2	6	-	2	1	2	-	4	2	5	1	2	3	-	2	3	13	-	8	4	7	5	1	3	4	4
CGCGBOXAT	2	12	8	2	2	6	-	-	4	4	6	8	4	4	-	2	8	-	-	-	12	6	12	16	6	-	12	4	10	26
CIACADIANLELHC	1	2	1	1	-	-	2	-	2	1	1	2	1	1	2	1	-	1	-	1	1	1	-	1	-	-	2	1	-	1
CMSRE1IBSPOA	-	1	-	-	-	-	-	1	-	-	-	-	-	1	-	-	-	-	-	-	1	-	1	-	1	-	-	-	-	-
CPBCSPOR	-	2	-	-	-	-	1	2	1	-	1	-	-	-	1	1	-	1	-	-	-	-	-	-	-	2	-	-	-	-
CPRFPCCHS	-	-	-	-	-	-	-	-	-	-	-	-	-	-	-	-	-	-	-	-	-	-	-	-	-	-	-	-	1	-
CRTDREHVCBF2	-	-	-	-	-	-	-	-	-	-	2	-	-	-	-	-	-	-	-	2	-	-	-	-	-	-	-	-	-	-
CTRMCAMV35S	-	-	-	-	-	-	-	-	-	-	-	1	-	-	-	-	-	-	1	-	-	-	-	6	-	-	-	-	1	-
CURECORECR	4	18	6	4	8	4	14	8	2	8	6	6	8	8	2	6	16	8	12	6	4	22	6	2	8	4	4	4	4	14
D1GMAUX28	-	-	-	-	-	-	-	-	-	1	-	-	-	-	-	-	-	-	-	-	-	-	-	-	-	-	-	-	-	-
DOFCOREZM	17	15	19	16	12	9	12	12	26	17	25	11	8	14	12	17	11	14	18	28	13	18	9	13	10	17	24	13	7	9
DPBFCOREDCDC3	5	2	1	2	3	2	5	3	4	3	3	1	5	5	2	2	3	3	4	5	2	4	2	2	5	3	3	-	2	2
DRE2COREZMRAB17	-	-	-	-	-	-	-	-	1	-	-	-	6	-	-	-	1	-	1	2	-	-	1	1	2	-	-	1	2	-
DRECRTCOREAT	1	2	-	-	1	2	-	-	1	-	-	2	8	3	-	2	1	-	2	3	3	-	3	3	3	-	-	1	3	1
E2F1OSPCNA	-	-	-	-	1	-	-	-	-	-	-	-	-	-	-	-	-	-	-	-	-	-	-	-	-	-	-	-	-	1
E2FANTRNR	-	-	-	-	1	-	-	-	-	-	-	-	-	-	-	-	-	-	-	-	-	-	-	-	-	-	-	-	-	1
E2FAT	-	-	-	-	-	-	-	-	-	-	-	-	-	-	-	-	-	-	1	-	-	-	-	-	-	-	-	-	-	1
E2FBNTRNR	-	1	-	-	-	-	-	-	-	-	-	-	-	-	-	-	-	-	-	-	-	-	-	-	-	-	-	-	-	-
E2FCONSENSUS	2	1	-	-	1	-	1	-	-	1	1	1	-	1	-	-	1	3	-	-	1	-	2	2	1	-	-	1	-	2
EBOXBNNAPA	30	14	4	16	32	4	26	12	14	16	16	4	6	10	22	12	10	14	14	22	10	12	18	4	16	6	16	14	14	20
EECCRCAH1	2	1	2	2	3	1	3	2	4	2	2	4	3	3	2	2	-	3	2	5	1	-	1	1	1	3	1	6	1	2
ELRECOREPCRP1	1	-	2	-	-	2	1	1	1	-	1	-	-	-	-	-	1	-	2	-	-	1	2	1	-	-	1	1	-	-
ELRENTCHN50	-	-	-	-	-	-	-	-	-	-	-	-	-	-	-	-	-	-	-	-	-	-	-	-	-	-	-	-	-	-
EMBP1TAEM	-	-	-	-	-	-	-	-	-	-	-	-	-	-	-	-	-	-	1	-	-	-	-	-	1	-	1	-	1	-
EMHVCHORD	-	-	-	1	-	-	-	-	-	-	-	-	-	-	-	-	-	-	-	-	-	-	-	-	-	-	-	-	-	-
ERELEE4	-	-	-	-	-	-	-	-	-	1	1	-	-	-	1	4	-	-	-	1	-	-	-	-	-	-	-	1	-	-
EVENINGAT	-	-	-	-	-	-	-	-	-	-	-	-	-	-	-	-	-	-	1	-	-	-	-	-	-	-	-	-	-	-
GADOWNAT	-	-	-	-	-	-	-	-	-	-	-	-	-	1	-	-	1	-	-	-	-	-	-	1	-	1	-	-	2	-
GAGA8HVBKN3	-	-	-	-	-	-	-	-	-	-	-	-	-	-	-	-	-	-	-	-	-	-	-	-	-	-	-	-	-	-
GAGAGMGSA1	-	-	-	-	-	-	-	-	-	-	-	-	-	-	-	-	-	-	-	-	-	-	-	-	-	-	-	-	-	-
GARE1OSREP1	-	1	-	1	-	-	-	-	1	-	-	-	-	-	-	-	-	1	-	-	-	-	-	-	-	-	-	-	-	-
GARE2OSREP1	-	-	-	-	-	-	-	-	-	-	-	-	-	-	-	-	-	-	-	-	-	-	-	-	-	-	-	-	1	-
GAREAT	2	1	1	-	-	-	2	-	1	3	1	-	-	-	-	-	-	-	-	1	-	1	-	-	-	-	-	1	-	-
GATABOX	7	3	7	12	9	13	10	9	9	8	5	7	10	7	20	5	6	12	10	9	7	12	7	7	7	9	11	6	7	7
GBOX10NT	-	-	-	-	-	-	-	-	-	-	-	-	-	-	-	-	-	-	-	-	-	-	-	-	-	-	-	-	-	-
GBOXLERBCS	-	-	-	-	-	-	-	-	-	-	-	-	-	-	-	-	-	-	-	-	-	-	-	-	1	-	1	-	1	-
GCAACREPEATZMZEIN	-	-	-	-	-	-	-	-	-	-	-	-	-	-	-	-	-	-	-	-	-	-	-	-	-	-	-	-	-	-
GCBP2ZMGAPC4	-	-	-	-	-	1	-	-	-	-	-	-	-	-	-	-	-	-	-	-	-	-	-	-	-	-	-	-	-	-
GCCCORE	1	2	2	1	-	3	1	2	-	1	-	8	-	1	-	-	-	-	1	1	6	-	5	6	3	2	-	1	1	4
GCN4OSGLUB1	-	-	-	-	-	-	-	-	-	-	-	-	-	-	-	-	-	-	-	-	-	-	-	-	-	-	-	-	-	-
GGTCCCATGMSAUR	-	-	-	-	-	-	-	-	-	-	-	-	-	-	-	-	-	-	-	-	-	-	-	-	-	-	-	-	-	-
GLMHVCHORD	-	-	-	-	-	-	-	-	-	-	-	-	-	-	-	-	-	-	-	-	-	-	-	-	-	-	-	-	-	-
GT1CONSENSUS	9	4	7	5	10	8	9	11	11	7	12	5	2	16	17	14	5	10	7	17	10	22	4	2	1	4	16	12	4	8
GT1CORE	1	-	1	-	1	-	1	-	-	-	-	1	1	-	1	-	-	1	-	-	-	-	-	-	-	2	-	-	-	-
GT1GMSCAM4	3	1	1	1	2	2	1	2	1	3	2	-	-	6	5	7	3	3	2	5	4	11	-	1	-	1	7	2	3	2
GT1MOTIFPSRBCS	-	-	-	-	-	-	-	-	-	-	-	-	-	1	-	-	-	-	-	-	-	-	-	-	-	-	-	-	-	1
GTGANTG10	10	10	6	8	15	16	18	8	7	13	10	7	9	14	20	8	12	7	14	6	8	11	8	5	10	9	17	15	9	11
HBOXCONSENSUSPVCHS	-	-	-	-	-	-	-	-	-	-	-	-	1	-	-	-	-	-	-	-	-	-	-	-	-	-	-	-	-	-
HDZIP2ATATHB2	-	1	-	-	-	-	-	-	-	-	1	-	-	-	-	-	-	-	-	-	1	-	-	-	-	-	-	1	1	-
HEXAMERATH4	1	-	-	1	-	3	-	2	-	1	-	1	1	1	-	2	-	-	-	-	2	-	2	1	2	3	-	-	-	1
HEXAT	-	-	-	-	-	-	-	-	-	-	-	-	-	-	-	-	-	-	-	-	-	-	-	-	-	-	-	-	-	-
HEXMOTIFTAH3H4	1	-	-	1	1	-	-	-	-	1	-	-	-	1	1	-	1	-	-	-	-	-	-	-	-	-	-	-	-	2
HSELIKENTACIDICPR1	-	-	-	-	-	-	-	-	-	-	-	-	-	-	-	-	-	-	-	-	-	-	-	-	-	-	-	-	-	-
IBOX	-	-	1	-	1	2	-	-	-	-	-	-	2	-	-	-	1	-	-	1	-	1	-	1	-	-	-	-	1	-
IBOXCORE	1	-	1	2	3	6	6	2	4	2	1	2	3	2	6	2	3	1	-	5	-	4	1	1	1	2	2	4	3	3
IBOXCORENT	-	-	-	-	1	1	-	-	-	-	-	-	-	-	-	-	-	-	-	-	-	-	-	1	-	-	-	-	1	-
INRNTPSADB	1	1	1	3	1	2	3	2	2	3	5	2	3	5	3	2	2	1	3	1	1	2	-	-	1	2	5	-	-	4
INTRONLOWER	2	1	-	-	2	-	1	-	-	-	1	-	1	3	1	-	4	-	-	1	1	1	-	1	1	2	-	-	1	-
IRO2OS	-	-	-	-	-	-	-	-	-	-	-	-	-	-	-	-	-	-	1	1	-	-	1	-	1	-	1	-	3	-
L1BOXATPDF1	-	-	-	-	-	-	-	-	-	-	1	-	-	-	-	1	-	-	-	-	-	-	-	-	-	-	-	-	-	-
LBOXLERBCS	-	-	-	-	-	-	-	-	-	-	-	-	-	-	-	-	-	-	-	-	-	-	-	-	-	-	-	-	-	-
LEAFYATAG	-	-	-	-	1	1	-	-	-	1	-	-	-	-	-	1	-	-	-	1	-	-	1	-	-	-	-	-	-	2
LECPLEACS2	-	-	-	-	-	-	-	1	-	-	1	-	-	-	-	-	-	-	1	3	-	-	-	-	-	-	-	1	2	-
LRENPCABE	-	-	-	-	-	-	-	-	-	-	-	-	-	-	-	-	-	-	-	-	-	-	-	-	-	-	-	1	-	-
LTRE1HVBLT49	-	-	1	-	1	1	1	-	-	-	1	-	1	1	-	-	-	-	1	-	1	1	-	-	-	1	-	1	1	1
LTREATLTI78	-	-	-	-	-	-	-	-	1	-	-	-	3	-	-	-	-	-	-	1	-	-	-	-	1	-	-	1	1	-
LTRECOREATCOR15	2	7	-	1	2	4	1	1	2	1	-	4	10	5	-	2	1	1	3	3	4	-	3	8	6	3	-	4	3	3
MARABOX1	-	-	1	-	-	-	-	1	-	-	-	-	-	-	-	-	-	-	1	-	-	1	-	-	-	-	1	-	-	-
MARARS	-	-	-	-	-	-	-	-	-	-	-	-	-	-	-	-	-	-	-	-	-	-	-	-	-	-	-	-	-	-
MARTBOX	-	-	-	-	4	1	-	1	-	-	-	-	-	3	-	2	-	-	-	-	-	1	-	-	-	-	1	-	-	-
MNF1ZMPPC1	-	-	-	-	-	1	-	-	-	-	-	-	-	-	-	-	-	-	-	-	-	-	-	-	-	-	-	-	-	-
MSACRCYM	-	-	-	-	-	-	-	-	-	-	-	-	-	-	-	-	-	-	-	-	-	-	-	-	-	-	-	-	-	-
MYB1AT	3	1	2	-	1	-	3	2	2	3	2	1	1	1	3	2	4	2	1	3	2	-	-	3	1	3	3	2	1	2
MYB1LEPR	-	1	-	-	-	-	1	-	-	-	-	-	-	-	-	-	3	-	-	-	-	-	-	-	1	-	-	-	-	-
MYB26PS	-	-	-	-	-	-	-	-	-	-	1	-	-	-	-	-	-	-	-	-	1	-	-	-	-	-	-	-	1	-
MYB2AT	-	-	-	1	-	1	3	-	-	1	-	-	-	1	-	1	-	-	-	-	-	1	-	-	-	-	-	-	-	-
MYB2CONSENSUSAT	4	3	2	2	4	1	3	2	-	3	1	-	-	1	1	1	1	2	2	3	2	4	1	2	1	1	4	-	2	4
MYBATRD22	1	-	-	-	-	-	-	-	-	-	1	-	-	1	-	-	1	-	-	-	1	-	-	-	1	-	-	-	1	-
MYBCORE	6	7	4	8	6	2	5	4	4	6	2	-	3	2	1	2	2	3	3	5	3	6	3	3	1	3	6	1	5	6
MYBCOREATCYCB1	3	5	1	1	3	3	-	2	-	1	-	1	-	2	-	-	2	1	1	2	1	2	1	3	4	2	6	1	2	1
MYBGAHV	1	-	1	-	-	-	-	-	1	3	-	-	-	-	-	-	-	-	-	1	-	1	-	-	-	-	-	1	-	-
MYBPLANT	1	-	-	-	-	-	-	-	1	-	1	-	-	-	-	-	1	-	-	-	2	-	-	-	-	1	-	1	1	1
MYBPZM	1	-	1	1	1	1	1	2	2	1	2	3	2	1	-	-	1	-	1	-	3	-	3	1	2	-	1	3	1	1
MYBST1	1	1	1	3	3	5	1	2	3	1	-	1	1	3	5	-	2	5	2	2	2	2	3	4	3	4	4	3	1	1
MYCATERD1	2	-	-	-	5	-	1	-	-	1	1	-	-	-	2	3	1	2	1	5	-	1	2	-	-	-	1	-	1	-
MYCATRD22	2	-	-	-	5	-	1	-	-	1	1	-	-	-	2	3	1	2	1	5	-	1	2	-	-	-	1	-	1	-
MYCCONSENSUSAT	30	14	4	16	32	4	26	12	14	16	16	4	6	10	22	12	10	14	14	22	10	12	18	4	16	6	16	14	14	20
NAPINMOTIFBN	-	-	-	-	1	-	-	-	1	-	-	-	-	-	1	1	-	-	-	-	-	-	-	-	-	-	1	-	1	-
NODCON1GM	3	-	2	1	-	1	3	1	2	-	2	1	1	1	-	2	1	3	1	-	-	1	-	-	-	-	-	1	-	1
NODCON2GM	5	5	1	5	6	2	8	6	5	8	4	7	2	3	3	-	2	3	5	5	3	2	1	3	3	3	6	2	5	5
NONAMERATH4	-	-	-	-	-	-	-	-	-	1	-	-	-	-	-	-	-	-	-	-	-	-	-	-	-	-	-	-	-	-
NONAMERMOTIFTAH3H4	-	-	-	-	-	-	-	-	-	-	-	-	-	-	-	-	-	-	-	-	-	-	-	-	-	-	-	-	-	-
NRRBNEXTA	-	-	-	-	-	-	-	-	-	1	-	-	-	-	1	-	-	-	-	-	-	-	-	-	-	-	-	-	-	-
NTBBF1ARROLB	-	4	2	1	-	1	-	-	1	-	1	-	-	-	1	1	-	-	1	2	1	-	-	2	-	1	-	1	1	1
OCTAMERMOTIFTAH3H4	-	-	-	-	-	-	-	-	-	-	-	-	-	-	-	-	-	-	-	-	-	-	-	-	-	-	-	-	-	1
OCTAMOTIF2	-	-	-	-	-	-	-	-	-	-	-	-	-	-	-	-	-	-	-	-	-	-	-	-	-	-	-	-	-	-
OPAQUE2ZMB32	-	-	-	-	-	-	-	-	-	-	-	-	-	-	-	-	-	-	-	-	-	-	-	-	-	-	-	-	-	-
OSE1ROOTNODULE	3	-	2	1	-	1	3	1	2	-	2	1	1	1	-	2	1	3	1	-	-	1	-	-	-	-	-	1	-	1
OSE2ROOTNODULE	5	5	1	5	6	2	8	6	5	8	4	7	2	3	3	-	2	3	5	5	3	2	1	3	3	3	6	2	5	5
P1BS	-	2	-	2	2	2	-	2	-	2	2	2	-	-	2	-	-	-	-	-	-	-	2	2	-	-	-	-	-	-
PALBOXAPC	-	2	1	1	1	2	-	1	-	-	-	-	-	1	-	-	-	-	-	1	4	-	1	1	4	-	1	2	1	-
PALBOXPPC	-	-	-	-	-	-	-	-	-	-	-	-	-	-	-	-	-	-	-	-	-	-	-	-	-	-	-	-	-	-
PALINDROMICCBOXGM	-	-	-	-	-	-	-	-	-	-	-	-	-	-	-	-	-	-	-	-	-	-	-	-	-	-	-	-	-	2
PE2FNTRNR1A	-	-	-	-	-	-	-	-	-	-	1	-	-	-	-	-	-	-	-	-	-	-	-	-	-	-	-	-	-	-
POLASIG1	2	3	5	-	3	1	1	3	2	-	1	1	-	6	2	6	-	3	4	2	2	5	1	3	1	1	7	2	1	3
POLASIG2	-	1	-	-	-	-	-	-	1	-	-	-	-	-	-	2	-	-	-	1	1	-	-	-	-	-	-	1	-	1
POLASIG3	1	3	1	1	1	1	1	3	-	3	2	3	-	2	2	8	2	2	4	2	4	5	-	1	-	2	1	6	-	3
POLLEN1LELAT52	3	3	6	6	2	3	8	6	7	2	2	1	1	12	8	11	4	8	8	15	7	14	4	3	3	5	13	3	4	5
PREATPRODH	-	-	1	-	-	2	-	2	1	1	-	-	-	1	-	-	-	4	-	2	-	2	-	-	1	-	1	1	3	-
PRECONSCRHSP70A	3	2	-	2	1	-	-	1	-	1	-	2	3	1	1	-	2	3	1	3	5	-	5	-	2	4	-	3	5	-
PROLAMINBOXOSGLUB1	1	-	1	1	1	-	-	-	-	-	2	-	-	-	-	-	-	-	-	-	-	-	-	-	-	1	-	1	-	-
PROXBBNNAPA	-	-	-	-	-	-	-	-	-	-	-	-	1	-	-	-	-	-	-	-	-	-	-	-	-	-	-	-	-	-
PYRIMIDINEBOXHVEPB1	-	-	-	-	1	-	-	-	-	-	-	-	-	3	-	2	-	-	-	1	-	2	-	-	-	-	-	-	-	-
PYRIMIDINEBOXOSRAMY1A	1	1	1	1	1	1	-	1	2	-	2	1	-	-	-	1	-	1	-	1	-	2	2	1	-	2	5	1	-	1
QARBNEXTA	-	-	-	-	-	-	-	-	-	-	-	-	-	-	-	-	-	-	-	-	-	-	-	1	-	1	-	-	1	-
QELEMENTZMZM13	-	-	-	-	-	-	1	1	1	-	-	1	-	-	-	-	-	-	-	-	-	-	2	-	1	-	-	2	-	-
RAV1AAT	8	4	8	6	2	1	5	9	5	5	8	1	2	3	3	4	2	6	6	4	4	16	3	7	2	2	4	5	3	3
RAV1BAT	2	2	-	2	1	-	2	1	2	-	1	1	1	1	1	-	1	-	-	-	-	1	-	1	2	2	-	-	-	2
RBCSCONSENSUS	-	-	-	-	-	-	-	-	-	1	1	1	-	-	-	-	-	2	-	-	1	1	-	-	-	-	-	1	-	-
RBCSGBOXPS	-	-	-	-	-	-	-	-	-	-	-	-	-	-	-	-	-	-	-	-	-	-	-	-	-	-	-	-	-	-
REALPHALGLHCB21	2	1	1	-	-	-	-	2	-	2	2	-	-	1	1	1	3	1	-	1	1	1	-	1	1	1	1	1	1	2
REBETALGLHCB21	1	-	1	-	-	2	-	1	-	-	-	-	-	-	-	-	-	-	1	-	-	-	1	1	-	-	1	-	-	-
RGATAOS	-	-	-	-	-	1	-	-	-	-	-	-	-	-	-	-	-	-	-	-	-	-	-	-	-	-	-	-	1	-
RHERPATEXPA7	3	1	2	-	3	1	-	3	3	2	1	-	2	4	-	5	2	1	6	1	2	1	9	4	3	-	2	5	1	1
ROOTMOTIFTAPOX1	4	5	4	5	1	6	5	9	7	2	6	4	1	3	22	15	3	3	5	5	5	3	3	1	-	3	5	7	2	-
RYREPEATBNNAPA	-	-	1	1	5	-	-	-	2	1	2	-	-	1	-	1	-	1	3	-	2	2	1	1	4	2	-	1	2	-
RYREPEATGMGY2	-	-	1	-	-	-	-	-	1	-	-	-	-	-	-	1	-	-	3	-	-	1	1	1	1	-	-	-	-	-
RYREPEATLEGUMINBOX	-	-	1	-	3	-	-	-	1	1	-	-	-	-	-	1	-	-	3	-	-	2	1	1	1	1	-	1	-	-
RYREPEATVFLEB4	-	-	-	-	-	-	-	-	-	-	-	-	-	-	-	-	-	-	2	-	-	-	-	-	-	-	-	-	-	-
S1FBOXSORPS1L21	-	1	2	-	1	-	2	1	1	1	-	-	1	-	1	-	2	-	3	-	-	1	-	1	-	-	-	-	-	-
S1FSORPL21	-	-	-	-	-	-	-	-	-	-	-	-	-	-	-	-	-	-	-	-	-	-	-	1	-	-	-	-	-	-
S2FSORPL21	-	-	-	-	-	-	-	-	-	-	-	-	-	-	-	-	-	-	-	-	-	-	-	-	-	-	-	-	-	-
SBOXATRBCS	1	-	-	-	-	-	-	1	-	-	-	-	-	-	-	-	-	-	-	-	-	1	-	-	-	1	-	-	-	-
SEBFCONSSTPR10A	-	2	1	3	-	-	3	-	-	-	1	1	-	-	1	-	1	2	3	1	1	2	-	1	1	-	-	2	-	-
SEF1MOTIF	1	-	-	-	-	-	-	1	1	-	-	-	-	-	-	-	-	-	1	-	-	1	-	-	-	-	-	1	-	-
SEF3MOTIFGM	2	1	1	2	-	1	1	-	1	-	1	-	1	-	-	5	2	1	-	1	1	2	2	1	1	1	1	2	-	-
SEF4MOTIFGM7S	1	2	3	1	1	-	1	6	-	1	2	2	-	2	1	12	-	-	1	3	-	5	-	1	1	-	2	5	-	3
SITEIIAOSPCNA	-	-	-	-	-	-	-	-	-	-	-	-	-	-	-	-	-	-	-	-	-	-	-	-	-	-	-	-	-	-
SITEIIATCYTC	2	-	2	2	-	3	2	2	-	-	1	4	2	1	-	6	2	3	-	1	7	2	4	1	3	-	1	2	-	2
SITEIOSPCNA	-	-	-	-	-	-	-	-	-	-	-	-	-	-	-	-	-	-	-	-	-	-	-	-	-	1	-	-	-	-
SORLIP1AT	8	6	4	6	4	2	1	8	2	5	2	3	2	3	3	2	5	1	1	5	3	-	6	4	3	7	2	2	8	4
SORLIP2AT	3	-	2	5	1	5	2	1	2	-	-	3	10	1	-	7	5	2	-	2	6	2	3	5	6	3	1	1	3	9
SORLIP3AT	-	-	-	-	-	-	-	-	-	-	-	-	-	-	-	-	-	-	-	-	-	-	-	-	-	-	-	1	-	-
SORLIP5AT	-	-	1	-	-	-	-	-	-	-	-	1	-	-	-	-	-	-	-	-	-	-	-	-	-	-	1	-	-	-
SORLREP2AT	-	-	-	-	-	-	-	-	-	-	-	-	-	-	-	-	-	-	-	-	-	-	-	-	-	-	-	-	-	-
SORLREP3AT	-	-	-	-	-	-	-	1	-	-	-	-	-	-	-	-	-	-	-	-	-	-	-	-	-	-	-	-	-	-
SORLREP4AT	-	-	-	-	-	-	-	-	-	-	-	1	-	-	-	-	-	-	-	-	-	-	-	-	-	-	-	-	-	-
SP8BFIBSP8AIB	-	-	-	-	-	-	-	-	-	-	1	-	-	-	-	-	-	-	-	-	-	-	-	-	-	-	-	-	-	-
SP8BFIBSP8BIB	-	-	-	-	1	-	-	-	1	-	-	-	-	-	-	-	1	-	-	-	-	-	-	-	-	-	-	1	-	-
SPHCOREZMC1	-	-	1	-	-	-	-	-	-	-	-	-	-	-	-	-	-	-	-	-	-	-	-	-	-	-	-	-	-	-
SREATMSD	-	-	-	-	1	1	1	1	2	-	-	1	-	1	3	-	-	1	-	1	-	-	1	1	-	-	1	2	1	1
SURE1STPAT21	-	1	1	-	-	-	-	-	-	-	-	-	-	1	3	-	-	-	-	-	-	-	-	-	-	-	-	-	-	-
SURE2STPAT21	-	-	-	-	-	-	-	-	-	-	-	-	-	-	-	-	-	-	-	-	-	-	-	-	-	-	-	-	-	-
SURECOREATSULTR11	4	2	2	4	3	2	-	1	2	2	3	6	2	2	1	2	-	5	4	3	1	2	1	2	4	2	2	1	2	3
SV40COREENHAN	1	-	-	1	-	-	-	-	1	-	-	1	-	-	1	-	1	1	-	-	1	-	1	-	-	-	1	-	-	1
T/GBOXATPIN2	-	-	-	-	-	-	-	-	1	-	-	-	1	-	-	1	1	-	1	-	1	1	1	2	-	1	1	-	1	-
TAAAGSTKST1	1	6	3	4	-	1	4	-	9	2	6	4	2	2	3	1	1	1	2	3	2	-	-	2	1	4	3	3	2	5
TATABOX2	1	-	1	-	-	-	-	-	1	-	-	-	-	-	-	-	-	-	-	-	-	1	-	-	-	-	-	1	-	-
TATABOX3	-	-	1	1	-	-	2	-	-	-	-	-	-	-	2	1	-	-	-	-	2	1	-	-	-	-	-	-	-	-
TATABOX4	-	-	4	-	2	-	-	-	-	-	-	-	1	-	-	-	-	-	2	-	-	-	-	-	-	-	-	-	-	1
TATABOX5	2	1	3	1	5	4	3	4	3	4	4	2	-	5	2	8	1	1	9	3	4	5	-	2	1	-	4	4	-	1
TATABOXOSPAL	-	-	-	-	-	-	-	1	1	-	-	-	-	-	1	-	-	-	1	1	-	-	-	2	1	-	1	3	-	-
TATAPVTRNALEU	-	-	-	-	-	-	-	-	-	-	-	-	-	-	-	-	-	-	-	-	-	-	-	-	-	-	-	-	-	-
TATCCACHVAL21	-	-	-	1	-	-	1	-	-	-	-	-	-	-	1	-	-	-	-	-	-	-	-	-	-	-	-	-	-	-
TATCCAOSAMY	-	1	-	2	2	1	1	-	2	-	-	-	1	2	1	-	-	3	-	-	-	-	-	-	1	1	2	1	-	-
TATCCAYMOTIFOSRAMY3D	-	1	-	1	1	-	1	-	1	-	-	-	-	1	1	-	-	1	-	-	-	-	-	-	1	-	2	1	-	-
TBOXATGAPB	1	1	5	3	3	1	1	2	-	3	-	1	-	-	4	-	1	1	2	1	1	3	-	1	-	2	-	1	-	-
TCA1MOTIF	-	-	-	-	-	-	-	-	-	-	-	-	-	-	-	-	-	-	-	-	-	-	-	-	-	-	-	-	1	-
TE2F2NTPCNA	-	-	-	-	-	-	-	-	-	-	-	-	-	-	-	-	-	-	-	-	-	-	-	-	-	-	-	-	-	-
TELOBOXATEEF1AA1	-	-	-	-	-	-	-	-	-	1	-	-	-	-	-	-	-	-	-	-	-	-	-	-	-	-	-	-	-	-
TGACGTVMA	-	-	-	-	-	-	-	-	-	-	-	-	-	-	-	-	-	-	-	-	-	-	-	-	-	-	-	-	-	-
TGACGTVMAMY	1	-	-	1	1	-	-	-	-	1	-	-	-	1	1	-	1	-	-	-	-	-	-	-	-	-	-	-	-	2
TGTCACACMCUCUMISIN	-	-	-	1	-	-	-	-	-	-	1	-	-	-	1	-	1	-	1	2	-	-	-	-	-	-	-	-	-	1
TL1ATSAR	1	-	-	-	-	-	-	-	-	-	-	1	-	-	-	-	-	-	-	-	-	-	-	-	-	-	-	-	-	-
TOPOISOM	-	-	-	-	-	-	-	-	-	-	-	-	-	-	-	-	-	-	-	-	-	1	-	-	-	-	-	-	-	-
UP1ATMSD	-	-	-	-	-	-	1	-	-	-	-	-	-	-	-	1	-	1	-	-	-	-	1	-	1	-	-	-	-	-
UP2ATMSD	-	-	-	-	-	1	-	-	1	1	-	-	-	-	-	-	-	-	-	-	1	-	-	-	-	-	-	-	-	1
UPRMOTIFIAT	-	-	-	-	-	-	-	-	-	-	-	-	-	-	-	-	-	-	-	-	-	-	-	-	-	-	-	-	-	-
UPRMOTIFIIAT	-	-	-	-	-	-	-	-	-	-	-	1	-	-	-	-	-	-	-	1	-	-	1	-	1	-	-	1	-	-
VSF1PVGRP18	-	-	-	-	-	-	-	-	-	-	-	-	-	-	-	-	-	-	-	-	-	-	-	-	-	-	-	-	-	-
WBBOXPCWRKY1	-	-	2	-	-	-	2	2	1	-	-	-	-	-	-	-	1	-	3	1	-	1	-	1	-	-	1	-	-	-
WBOXATNPR1	2	2	3	4	4	2	2	6	2	2	3	5	3	1	2	4	2	1	6	6	1	2	5	2	2	3	4	3	1	-
WBOXHVISO1	-	4	2	2	3	2	3	2	1	1	3	1	3	-	8	2	3	4	1	1	1	2	3	2	2	6	5	2	3	2
WBOXNTCHN48	-	4	1	3	3	3	1	-	1	-	-	-	2	-	2	-	1	-	-	-	2	2	4	1	2	3	2	-	1	1
WBOXNTERF3	1	7	4	3	5	8	6	3	4	1	4	2	4	-	10	3	4	5	3	1	4	4	10	3	8	10	12	5	4	2
WRECSAA01	-	-	-	-	1	-	-	-	-	-	-	-	-	-	-	-	-	1	-	-	-	-	-	-	-	-	-	-	-	-
WRKY71OS	9	11	7	11	9	11	13	10	8	7	8	7	10	5	22	8	16	7	10	12	8	6	15	7	14	20	14	10	7	9
WUSATAg	-	-	2	-	-	-	-	-	-	-	-	1	-	-	-	1	-	-	1	1	-	-	-	-	-	1	-	-	-	-
XYLAT	-	-	-	1	-	-	-	-	1	-	1	-	-	-	-	-	-	-	-	-	-	-	-	-	1	-	-	-	-	-
ZDNAFORMINGATCAB1	-	-	-	-	-	1	-	-	-	-	-	-	-	-	-	-	-	-	1	-	-	-	-	-	-	-	-	-	-	-
