# Supplementary material for: The Landscape of Autophagy-Related (ATG) Genes and Functional Characterization of TaVAMP727 to Autophagy in Wheat
Source: Int J Mol Sci. 2022 Jan 14;23(2):891. doi: 10.3390/ijms23020891 (PMC8776105; doi:10.3390/ijms23020891)
Supplement: Supplementary file 1 [file ijms-23-00891-s001.zip › Table S3.xlsx]

## Sheet: Sheet1
Table S3. Synteny events of ATGs among Triticum aestivum L., Triticum dicoccoides, Triticum urartu and Aegilops tauschii
	start	end	name	id	start	end	name	id
Triticum aestivum L. - Triticum dicoccoides	TraesCS1A02G3048001	TraesCS1A02G3112001	Ta1A_ATG14a	TraesCS1A02G308000.2	TRIDC1AG0453502	TRIDC1AG0463001	Td1A_ATG14a	TRIDC1AG045750.2
	TraesCS1A02G2535001	TraesCS1A02G2588001	-	-	TRIDC1AG0379402	TRIDC1AG0386606	Td1A_ATG18a	TRIDC1AG037940.2
	TraesCS1A02G2181001	TraesCS1A02G2231001	Ta1A_ATG3a	TraesCS1A02G220200.2	TRIDC1AG0329502	TRIDC1AG0336802	Td1A_ATG3a	TRIDC1AG033260.2
	TraesCS1B02G2637001	TraesCS1B02G2688001	-	-	TRIDC1BG0430902	TRIDC1BG0438203	Td1B_ATG18b	TRIDC1BG043140.5
	TraesCS1B02G2482001	TraesCS1B02G2531002	-	-	TRIDC1BG0408601	TRIDC1BG0414602	Td1B_ATG8a	TRIDC1BG040870.1
	TraesCS1B02G3180001	TraesCS1B02G3209001	Ta1B_ATG14b	TraesCS1B02G318700.1	TRIDC1BG0516804	TRIDC1BG0521301	-	-
	TraesCS1B02G2314002	TraesCS1B02G2341001	Ta1B_ATG3b	TraesCS1B02G233500.3	TRIDC1BG0383003	TRIDC1BG0387301	Td1B_ATG3b	TRIDC1BG038640.2
	TraesCS2A02G3840001	TraesCS2A02G3878001	Ta2A_ATG13a	TraesCS2A02G387200.1	TRIDC2AG0553502	TRIDC2AG0557902	Td2A_ATG13a	TRIDC2AG055740.2
	TraesCS2A02G1517001	TraesCS2A02G1610001	Ta2A_ATG14d	TraesCS2A02G160200.1	TRIDC2AG0190903	TRIDC2AG0202406	Td2A_ATG14b	TRIDC2AG020180.1
	TraesCS2A02G5175001	TraesCS2A02G5242002	Ta2A_ATG101a	TraesCS2A02G518700.1	TRIDC2AG0726103	TRIDC2AG0734102	Td2A_ATG101a	TRIDC2AG072790.2
	TraesCS2A02G4677001	TraesCS2A02G4738001	Ta2A_ATG8b	TraesCS2A02G468300.1	TRIDC2AG0662903	TRIDC2AG0669401	-	-
	TraesCS2A02G3492002	TraesCS2A02G3579002	Ta2A_ATG10a	TraesCS2A02G352700.1	TRIDC2AG0505507	TRIDC2AG05188019	Td2A_ATG10a	TRIDC2AG051050.1
	TraesCS2B02G3942001	TraesCS2B02G4056001	Ta2B_ATG13b	TraesCS2B02G404900.1	TRIDC2BG0572901	TRIDC2BG0586501	Td2B_ATG13b	TRIDC2BG058590.2
	TraesCS2B02G4871001	TraesCS2B02G4919001	Ta2B_ATG8d	TraesCS2B02G491200.1	TRIDC2BG0711503	TRIDC2BG0715801	Td2B_ATG8d	TRIDC2BG071430.1
	TraesCS2B02G5969001	TraesCS2B02G6029001	-	-	TRIDC2BG0867101	TRIDC2BG0874001	Td2B_ATG4b	TRIDC2BG086900.3
	TraesCS2B02G1779001	TraesCS2B02G1899001	Ta2B_ATG14e	TraesCS2B02G186500.1	TRIDC2BG0230102	TRIDC2BG0246503	-	-
	TraesCS3A02G2650001	TraesCS3A02G2675001	Ta3A_ATG6a	TraesCS3A02G266600.1	TRIDC3AG0395401	TRIDC3AG0398302	Td3A_ATG6a	TRIDC3AG039690.1
	TraesCS3B02G1096001	TraesCS3B02G1154001	Ta3B_ATG18c	TraesCS3B02G110900.1	TRIDC3BG0152907	TRIDC3BG0160403	Td3B_ATG18d	TRIDC3BG015410.3
	TraesCS3B02G1969001	TraesCS3B02G1995001	Ta3B_ATG22b	TraesCS3B02G197100.1	TRIDC3BG0268106	TRIDC3BG0272601	Td3B_ATG22b	TRIDC3BG026920.12
	TraesCS4A02G1125001	TraesCS4A02G1176002	Ta4A_ATG27a	TraesCS4A02G113700.1	TRIDC4AG0155602	TRIDC4AG0162601	Td4A_ATG27a	TRIDC4AG015690.2
	TraesCS4A02G0897001	TraesCS4A02G0939001	Ta4A_ATG1a	TraesCS4A02G093800.2	TRIDC4AG0122501	TRIDC4AG0127702	Td4A_ATG1a	TRIDC4AG012750.6
	TraesCS4A02G2066001	TraesCS4A02G2095001	Ta4A_ATG13d	TraesCS4A02G209500.1	TRIDC4AG0328705	TRIDC4AG0332701	Td4A_ATG13c	TRIDC4AG033270.1
	TraesCS4B02G1077002	TraesCS4B02G1139001	-	-	TRIDC4BG0167303	TRIDC4BG0175904	Td4B_ATG13d	TRIDC4BG017440.1
	TraesCS4B02G2242001	TraesCS4B02G2269001	-	-	TRIDC4BG0395905	TRIDC4BG0400008	Td4B_ATG9b	TRIDC4BG039590.1
	TraesCS5A02G1556001	TraesCS5A02G1617001	Ta5A-ATG8f	TraesCS5A02G158000.1	TRIDC5AG0258801	TRIDC5AG0267701	Td5A_ATG8e	TRIDC5AG026190.1
	TraesCS5A02G1381001	TraesCS5A02G1417001	Ta5A_ATG14g	TraesCS5A02G141000.1	TRIDC5AG0234201	TRIDC5AG0238305	Td5A_ATG14c	TRIDC5AG023740.1
	TraesCS6A02G1473001	TraesCS6A02G1495001	Ta6A_ATG11a	TraesCS6A02G149000.1	TRIDC6AG0202609	TRIDC6AG0206101	Td6A_ATG11a	TRIDC6AG020550.1
	TraesCS6B02G0665001	TraesCS6B02G0698001	Ta6B_ATG5d	TraesCS6B02G066500.1	TRIDC6BG0086206	TRIDC6BG0090604	Td6B_ATG5b	TRIDC6BG008620.1
Triticum aestivum L. - Triticum urartu	TraesCS1A02G2541001	TraesCS1A02G3157001	Ta1A_ATG14a	TraesCS1A02G308000.2	TuG1812G0100002938.01	TuG1812G0100003549.01	Tu1A_ATG18a	TuG1812G0100002940.01.P03
	TraesCS2A02G3846001	TraesCS2A02G3960001	Ta2A_ATG13a	TraesCS2A02G387200.1	TuG1812G0200004358.01	TuG1812G0200004476.01	Tu2A_ATG13a	TuG1812G0200004379.01.P01
	TraesCS2A02G1517001	TraesCS2A02G1670001	Ta2A_ATG14d	TraesCS2A02G160200.1	TuG1812G0200001604.01	TuG1812G0200001763.01	Tu2A_ATG14b	TuG1812G0200001708.01.P01
	TraesCS2A02G5145001	TraesCS2A02G5339001	Ta2A_ATG101a	TraesCS2A02G518700.1	TuG1812G0200005610.01	TuG1812G0200005793.01	Tu2A_ATG101a	TuG1812G0200005636.01.P01
	TraesCS2A02G5823001	TraesCS2A02G5858001	Ta2A_ATG4a	TraesCS2A02G584900.1	TuG1812G0200006146.01	TuG1812G0200006192.01	Tu2A_ATG4a	TuG1812G0200006188.01.P01
	TraesCS2A02G4670001	TraesCS2A02G4732001	Ta2A_ATG8b	TraesCS2A02G468300.1	TuG1812G0200005153.01	TuG1812G0200005202.01	Tu2A_ATG8b	TuG1812G0200005163.01.P01
	TraesCS2A02G3503001	TraesCS2A02G3548001	Ta2A_ATG10a	TraesCS2A02G352700.1	TuG1812G0200004051.01	TuG1812G0200004082.01	-	-
	TraesCS2A02G3525001	TraesCS2A02G3560001	-	-	TuG1812G0200003977.01	TuG1812G0200004008.01	Tu2A_ATG10a	TuG1812G0200004000.01.P02
	TraesCS4A02G0788001	TraesCS4A02G0841001	Ta4A_ATG9a	TraesCS4A02G079800.1	TuG1812G0400002585.01	TuG1812G0400002632.01	Tu4A_ATG9a	TuG1812G0400002621.01.P01
	TraesCS4A02G1110001	TraesCS4A02G1201001	Ta4A_ATG27a	TraesCS4A02G113700.1	TuG1812G0400002214.01	TuG1812G0400002309.01	Tu4A_ATG27a	TuG1812G0400002289.01.P02
	TraesCS4A02G2085001	TraesCS4A02G2120001	Ta4A_ATG13d	TraesCS4A02G209500.1	TuG1812G0400001058.01	TuG1812G0400001090.01	Tu4A_ATG13b	TuG1812G0400001081.01.P01
	TraesCS5A02G1381001	TraesCS5A02G1417001	Ta5A_ATG14g	TraesCS5A02G141000.1	TuG1812G0500001628.01	TuG1812G0500001660.01	Tu5A_ATG14c	TuG1812G0500001633.01.P01
	TraesCS5A02G1574001	TraesCS5A02G1628003	Ta5A-ATG8f	TraesCS5A02G158000.1	TuG1812G0500001836.01	TuG1812G0500001906.01	Tu5A_ATG8c	TuG1812G0500001843.01.P01
	TraesCS6A02G2378001	TraesCS6A02G2649003	Ta6A_ATG13g	TraesCS6A02G238900.1	TuG1812G0600002667.01	TuG1812G0600002936.01	-	-
	TraesCS6A02G0388002	TraesCS6A02G0504001	Ta6A_ATG5a	TraesCS6A02G050200.1	TuG1812G0600000345.01	TuG1812G0600000465.01	-	-
	TraesCS6A02G0490001	TraesCS6A02G0539001	Ta6A_ATG5b	TraesCS6A02G050300.1	TuG1812G0600000495.01	TuG1812G0600000560.01	Tu6A_ATG5a	TuG1812G0600000509.01.P01
	TraesCS7A02G1610001	TraesCS7A02G1724001	-	-	TuG1812G0700001711.01	TuG1812G0700001829.01	Tu7A_ATG12b	TuG1812G0700001764.01.P01
Triticum aestivum L. - Aegilops tauschii	TraesCS1D02G2198001	TraesCS1D02G2225001	Ta1D_ATG3c	TraesCS1D02G221700.1	AET1Gv205479005	AET1Gv205520004	Aet1D_ATG3a	AET1Gv20551000.1
	TraesCS2D02G3820001	TraesCS2D02G3850001	Ta2D_ATG13c	TraesCS2D02G384600.1	AET2Gv208582007	AET2Gv2086330011	Aet2D_ATG13a	AET2Gv20862900.1
	TraesCS2D02G5194001	TraesCS2D02G5238001	Ta2D_ATG101b	TraesCS2D02G520100.1	AET2Gv211410002	AET2Gv211503001	Aet2D_ATG101a	AET2Gv21143300.3
	TraesCS2D02G3487001	TraesCS2D02G3528001	-	-	AET2Gv207876001	AET2Gv207959003	Aet2D_ATG10a	AET2Gv20793400.5
	TraesCS3D02G0934001	TraesCS3D02G0970001	-	-	AET3Gv2020230026	AET3Gv202082004	Aet3D_ATG18c	AET3Gv20205500.1
	TraesCS4D02G2213001	TraesCS4D02G2275001	Ta4D_ATG1b	TraesCS4D02G211300.2	AET4Gv205604003	AET4Gv205738001	Aet4D_ATG9a	AET4Gv20566500.2
	TraesCS4D02G1900001	TraesCS4D02G1927001	Ta4D_ATG27c	TraesCS4D02G191800.1	AET4Gv204958001	AET4Gv205008002	Aet4D_ATG27a	AET4Gv20499100.8
Triticum aestivum L. - Triticum urartu	TRIDC1AG0455003	TRIDC1AG0458703	Td1A_ATG14a	TRIDC1AG045750.2	TuG1812G0100003443.01	TuG1812G0100003474.01	Tu1A_ATG14a	TuG1812G0100003466.01.P01
	TRIDC2AG0662903	TRIDC2AG0666401	-	-	TuG1812G0200005160.01	TuG1812G0200005186.01	Tu2A_ATG8b	TuG1812G0200005163.01.P01
	TRIDC2AG0436301	TRIDC2AG0440701	Td2A_ATG7a	TRIDC2AG043750.4	TuG1812G0200003448.01	TuG1812G0200003481.01	-	-
	TRIDC2AG0555101	TRIDC2AG0559903	Td2A_ATG13a	TRIDC2AG055740.2	TuG1812G0200004363.01	TuG1812G0200004398.01	Tu2A_ATG13a	TuG1812G0200004379.01.P01
	TRIDC2AG0515902	TRIDC2AG0518301	-	-	TuG1812G0200003989.01	TuG1812G0200004028.01	Tu2A_ATG10a	TuG1812G0200004000.01.P02
	TRIDC4AG0156001	TRIDC4AG0162601	Td4A_ATG27a	TRIDC4AG015690.2	TuG1812G0400002240.01	TuG1812G0400002291.01	Tu4A_ATG27a	TuG1812G0400002289.01.P02
	TRIDC4AG0110301	TRIDC4AG0112307	-	-	TuG1812G0400002602.01	TuG1812G0400002624.01	Tu4A_ATG9a	TuG1812G0400002621.01.P01
	TRIDC5AG0562601	TRIDC5AG0564806	Td5A_ATG16a	TRIDC5AG056260.1	TuG1812G0500004136.01	TuG1812G0500004153.01	Tu5A_ATG16a	TuG1812G0500004136.01.P01
	TRIDC5AG0234201	TRIDC5AG0238405	Td5A_ATG14c	TRIDC5AG023740.1	TuG1812G0500001621.01	TuG1812G0500001660.01	Tu5A_ATG14c	TuG1812G0500001633.01.P01
	TRIDC6AG0502102	TRIDC6AG0503101	Td6A_ATG12a	TRIDC6AG050230.1	TuG1812G0600003590.01	TuG1812G0600003607.01	Tu6A_ATG12a	TuG1812G0600003592.01.P02
Triticum dicoccoides - Aegilops tauschii	TRIDC1AG0332204	TRIDC1AG0333602	Td1A_ATG3a	TRIDC1AG033260.2	AET1Gv2055050012	AET1Gv205520004	Aet1D_ATG3a	AET1Gv20551000.1
	TRIDC2AG0727002	TRIDC2AG0727902	Td2A_ATG101a	TRIDC2AG072790.2	AET2Gv2114190011	AET2Gv211433003	Aet2D_ATG101a	AET2Gv21143300.3
	TRIDC2AG0662903	TRIDC2AG0664402	-	-	AET2Gv210327005	AET2Gv210349008	Aet2D_ATG8b	AET2Gv21034400.6
	TRIDC2AG0510501	TRIDC2AG0511802	Td2A_ATG10a	TRIDC2AG051050.1	AET2Gv207919001	AET2Gv207934005	Aet2D_ATG10a	AET2Gv20793400.5
	TRIDC2BG0713701	TRIDC2BG0714901	Td2B_ATG8d	TRIDC2BG071430.1	AET2Gv2103190025	AET2Gv210328001	-	-
	TRIDC3AG0113601	TRIDC3AG0114704	-	-	AET3Gv202045003	AET3Gv202056006	Aet3D_ATG18c	AET3Gv20205500.1
	TRIDC4AG0156204	TRIDC4AG0158201	Td4A_ATG27a	TRIDC4AG015690.2	AET4Gv204977002	AET4Gv204997003	Aet4D_ATG27a	AET4Gv20499100.8
	TRIDC4BG0395901	TRIDC4BG0398301	Td4B_ATG9b	TRIDC4BG039590.1	AET4Gv205665002	AET4Gv205706001	Aet4D_ATG9a	AET4Gv20566500.2
	TRIDC5AG0236901	TRIDC5AG0238201	Td5A_ATG14c	TRIDC5AG023740.1	AET5Gv203679004	AET5Gv203696002	Aet5D_ATG14a	AET5Gv20368700.2
	TRIDC6AG0205202	TRIDC6AG0206101	Td6A_ATG11a	TRIDC6AG020550.1	AET6Gv203808001	AET6Gv203822006	Aet6D_ATG11a	AET6Gv20381600.1
Aegilops tauschii - Triticum urartu	AET2Gv208590003	AET2Gv2086330011	Aet2D_ATG13a	AET2Gv20862900.1	TuG1812G0200004363.01	TuG1812G0200004386.01	Tu2A_ATG13a	TuG1812G0200004379.01.P01
	AET2Gv210323001	AET2Gv210395002	Aet2D_ATG8b	AET2Gv21034400.6	TuG1812G0200005155.01	TuG1812G0200005194.01	Tu2A_ATG8b	TuG1812G0200005163.01.P01
	AET3Gv202045003	AET3Gv202087001	Aet3D_ATG18c	AET3Gv20205500.1	TuG1812G0300001035.01	TuG1812G0300001078.01	Tu3A_ATG18b	TuG1812G0300001037.01.P01
	AET4Gv204966001	AET4Gv204999001	Aet4D_ATG27a	AET4Gv20499100.8	TuG1812G0400002260.01	TuG1812G0400002291.01	Tu4A_ATG27a	TuG1812G0400002289.01.P02
	AET4Gv205619001	AET4Gv205654001	-	-	TuG1812G0400002602.01	TuG1812G0400002624.01	Tu4A_ATG9a	TuG1812G0400002621.01.P01
