# Supplementary material for: The Landscape of Autophagy-Related (ATG) Genes and Functional Characterization of TaVAMP727 to Autophagy in Wheat
Source: Int J Mol Sci. 2022 Jan 14;23(2):891. doi: 10.3390/ijms23020891 (PMC8776105; doi:10.3390/ijms23020891)
Supplement: Supplementary file 1 [file ijms-23-00891-s001.zip › Table S4.xlsx]

## Sheet: Additional file 1
Additional file 1. The dN/dS ratios for orthologous ATGs between Triticum aestivum L. and Aegilops tauschii
Triticum aestivum		Aegilops tauschii		dN	dS	dN/dS
ID(Name)	Chr.	ID(Name)	Chr.
Ta4A_ATG1a	4A	Aet4D_ATG1a	4D	0.0069	0.0623	0.1101
Ta4D_ATG1b	4D	Aet4D_ATG1a	4D	0	0.0019	0
Ta6A_ATG2a	6A	Aet6D_ATG2a	6D	0.0216	0.0438	0.4935
Ta6B_ATG2b	6B	Aet6D_ATG2a	6D	0.0225	0.0439	0.5129
Ta7A_ATG2c	7A	Aet7D_ATG2b	7D	0.009	0.0198	0.4537
Ta7D_ATG2d	7D	Aet7D_ATG2b	7D	0.002	0.0039	0.5146
Ta1A_ATG3a	1A	Aet1D_ATG3a	1D	0.0014	0.072	0.019
Ta1B_ATG3b	1B	Aet1D_ATG3a	1D	0.0041	0.0525	0.0784
Ta1D_ATG3c	1D	Aet1D_ATG3a	1D	0	0	0
Ta2A_ATG4a	2A	Aet2D_ATG4a	2D	0.0267	0.0873	0.3054
TaUn_ATG4b	Un	Aet2D_ATG4a	2D	0.0891	0.1557	0.5721
Ta2D_ATG4c	2D	Aet2D_ATG4a	2D	0	0	0
Ta6A_ATG5a	6A	Aet6D_ATG5a	6D	0.1087	0.1975	0.5503
Ta6A_ATG5b	6A	Aet6D_ATG5a	6D	0.0187	0.052	0.3594
Ta6B_ATG5c	6B	Aet6D_ATG5a	6D	0.102	0.1864	0.5471
Ta6B_ATG5d	6B	Aet6D_ATG5a	6D	0.0149	0.0558	0.2677
TaUn_ATG5e	Un	Aet6D_ATG5a	6D	0	0.0117	0
Ta3A_ATG6a	3A	Aet3D_ATG6a	3D	0.011	0.0521	0.2105
Ta3D_ATG6b	3D	Aet3D_ATG6a	3D	0.0009	0	¥
Ta2D_ATG7a	2D	Aet2D_ATG7a	2D	0.0237	0.0256	0.9258
Ta3A_ATG7b	3A	Aet2D_ATG7a	2D	0.1696	0.2707	0.6266
Ta3B_ATG7c	3B	Aet2D_ATG7a	2D	0.1633	0.2481	0.6581
Ta3D_ATG7d	3D	Aet2D_ATG7a	2D	0.1647	0.2625	0.6273
Ta2D_ATG7a	2D	Aet3D_ATG7b	3D	0.1398	0.2327	0.6009
Ta3A_ATG7b	3A	Aet3D_ATG7b	3D	0.0156	0.0482	0.3236
Ta3B_ATG7c	3B	Aet3D_ATG7b	3D	0.0099	0.0236	0.4206
Ta3D_ATG7d	3D	Aet3D_ATG7b	3D	0	0	0
Ta2A_ATG8a	2A	Aet2D_ATG8a	2D	0	0.0561	0
Ta2B_ATG8c	2B	Aet2D_ATG8a	2D	0	0	0
Ta2A_ATG8b	2A	Aet2D_ATG8b	2D	0.0041	0.1666	0.0243
Ta2B_ATG8d	2B	Aet2D_ATG8b	2D	0	0.1184	0
Ta5A-ATG8f	5A	Aet5D_ATG8c	5D	0.0081	0.0421	0.193
Ta5B_ATG8g	5B	Aet5D_ATG8c	5D	0.0267	0.1102	0.2424
Ta5D_ATG8h	5D	Aet5D_ATG8c	5D	0.0246	0.0425	0.5781
Ta4A_ATG9a	4A	Aet4D_ATG9a	4D	0.0103	0.0703	0.146
Ta4B_ATG9b	4B	Aet4D_ATG9a	4D	0.0237	0.0911	0.2599
Ta4D_ATG9c	4D	Aet4D_ATG9a	4D	0.0005	0	¥
Ta2A_ATG10a	2A	Aet2D_ATG10a	2D	0.0248	0.0905	0.2735
Ta2B_ATG10b	2B	Aet2D_ATG10a	2D	0.0397	0.1351	0.294
Ta6A_ATG11a	6A	Aet6D_ATG11a	6D	0.0082	0.0466	0.1764
Ta6B_ATG11b	6B	Aet6D_ATG11a	6D	0.0063	0.0545	0.1149
Ta6D_ATG11c	6D	Aet6D_ATG11a	6D	0.0031	0.0038	0.8293
Ta6A_ATG12a	6A	Aet6D_ATG12a	6D	0.0563	0.0714	0.7894
Ta6B_ATG12b	6B	Aet6D_ATG12a	6D	0	0.0173	0
Ta6D_ATG12c	6D	Aet6D_ATG12a	6D	0	0	0
Ta6B_ATG12b	6B	Aet6D_ATG12b	6D	0.1928	0.2554	0.7549
Ta6D_ATG12c	6D	Aet6D_ATG12b	6D	0.1928	0.2557	0.754
Ta2A_ATG13a	2A	Aet2D_ATG13a	2D	0.0132	0.0369	0.3571
Ta2B_ATG13b	2B	Aet2D_ATG13a	2D	0.0087	0.0286	0.3057
Ta2D_ATG13c	2D	Aet2D_ATG13a	2D	0.0073	0	¥
Ta4A_ATG13d	4A	Aet4D_ATG13b	4D	0.0086	0.0213	0.4046
Ta4B_ATG13e	4B	Aet4D_ATG13b	4D	0.0072	0.0256	0.2807
Ta4D_ATG13f	4D	Aet4D_ATG13b	4D	0	0	0
Ta6A_ATG13g	6A	Aet6D_ATG13c	6D	0.0346	0.0772	0.4483
Ta6B_ATG13h	6B	Aet6D_ATG13c	6D	0.0305	0.0549	0.5557
Ta6D_ATG13i	6D	Aet6D_ATG13c	6D	0	0	0
Ta5A_ATG14g	5A	Aet5D_ATG14a	5D	0.0078	0.0694	0.1126
Ta5B_ATG14h	5B	Aet5D_ATG14a	5D	0.0091	0.0524	0.174
Ta5D_ATG14i	5D	Aet5D_ATG14a	5D	0.0013	0.0039	0.3287
Ta5D_ATG16a	5D	Aet5D_ATG16a	5D	0.0008	0.0055	0.1549
Ta1D_ATG18a	1D	Aet1D_ATG18a	1D	0	0	0
Ta3B_ATG18b	3B	Aet3D_ATG18b	3D	0	0.1304	0
Ta3B_ATG18c	3B	Aet3D_ATG18c	3D	0.0025	0.1008	0.0244
Ta6B_ATG18d	6B	Aet6D_ATG21d	6D	0.0038	0.1493	0.0252
Ta3A_ATG22a	3A	Aet3D_ATG22a	3D	0.0186	0.0503	0.3702
Ta3B_ATG22b	3B	Aet3D_ATG22a	3D	0.0314	0.0701	0.4477
Ta3B_ATG22c	3B	Aet3D_ATG22a	3D	0.0161	0.0422	0.3826
Ta3D_ATG22d	3D	Aet3D_ATG22a	3D	0.0378	0.05	0.756
Ta3D_ATG22e	3D	Aet3D_ATG22a	3D	0.0012	0.0343	0.0358
Ta4A_ATG27a	4A	Aet4D_ATG27a	4D	0.1539	0.223	0.6902
Ta4B_ATG27b	4B	Aet4D_ATG27a	4D	0.151	0.2201	0.6862
Ta4D_ATG27c	4D	Aet4D_ATG27a	4D	0.1229	0.1554	0.7909
Ta2A_ATG101a	2A	Aet2D_ATG101a	2D	0.007	0.098	0.0711
Ta2D_ATG101b	2D	Aet2D_ATG101a	2D	0.0023	0	¥

## Sheet: Additional file 2
Additional file 2. The dN/dS ratios for orthologous ATGs between Triticum aestivum L. and Triticum dicoccoides
Triticum aestivum		Triticum dicoccoides		dN	dS	dN/dS
ID(Name)	Chr.	ID(Name)	Chr.
Ta4A_ATG1a	4A	Td4A_ATG1a	4A	0	0	0
Ta4D_ATG1b	4D	Td4A_ATG1a	4A	0.0069	0.0602	0.114
Ta6A_ATG2a	6A	Td6A_ATG2a	6A	0.001	0.0011	0.9029
Ta6B_ATG2b	6B	Td6A_ATG2a	6A	0.0276	0.0575	0.4804
Ta6A_ATG2a	6A	Td6B_ATG2b	6B	0.0359	0.0703	0.5097
Ta6B_ATG2b	6B	Td6B_ATG2b	6B	0.0181	0.0188	0.9626
Ta7A_ATG2c	7A	Td7A_ATG2c	7A	0.0003	0.0011	0.2983
Ta7D_ATG2d	7D	Td7A_ATG2c	7A	0.0086	0.0183	0.4703
Ta1A_ATG3a	1A	Td1A_ATG3a	1A	0.0014	0	¥
Ta1B_ATG3b	1B	Td1A_ATG3a	1A	0.0041	0.0878	0.0469
Ta1D_ATG3c	1D	Td1A_ATG3a	1A	0	0.072	0
Ta1A_ATG3a	1A	Td1B_ATG3b	1B	0.0055	0.093	0.0591
Ta1B_ATG3b	1B	Td1B_ATG3b	1B	0	0.0046	0
Ta1D_ATG3c	1D	Td1B_ATG3b	1B	0.0041	0.0575	0.0716
Ta2A_ATG4a	2A	Td2A_ATG4a	2A	0.0042	0.0499	0.0834
TaUn_ATG4b	Un	Td2A_ATG4a	2A	0.0882	0.1638	0.5385
Ta2D_ATG4c	2D	Td2A_ATG4a	2A	0.0168	0.064	0.2621
Ta2A_ATG4a	2A	Td2B_ATG4b	2B	0.0147	0.1035	0.1417
TaUn_ATG4b	Un	Td2B_ATG4b	2B	0.0697	0.0737	0.9464
Ta2D_ATG4c	2D	Td2B_ATG4b	2B	0.0083	0.0747	0.1116
Ta6A_ATG5a	6A	Td6A_ATG5a	6A	0.0291	0.0445	0.6522
Ta6A_ATG5b	6A	Td6A_ATG5a	6A	0.0845	0.2258	0.3745
Ta6B_ATG5c	6B	Td6A_ATG5a	6A	0.0356	0.1119	0.3181
Ta6B_ATG5d	6B	Td6A_ATG5a	6A	0.0801	0.2141	0.3742
TaUn_ATG5e	Un	Td6A_ATG5a	6A	0.0845	0.2167	0.3901
Ta6A_ATG5a	6A	Td6B_ATG5b	6B	0.0951	0.2504	0.3796
Ta6A_ATG5b	6A	Td6B_ATG5b	6B	0.027	0.0817	0.3305
Ta6B_ATG5c	6B	Td6B_ATG5b	6B	0.0924	0.1887	0.4898
Ta6B_ATG5d	6B	Td6B_ATG5b	6B	0.0278	0.0708	0.3929
TaUn_ATG5e	Un	Td6B_ATG5b	6B	0.0277	0.0792	0.3502
Ta3A_ATG6a	3A	Td3A_ATG6a	3A	0.0026	0.0088	0.2941
Ta3D_ATG6b	3D	Td3A_ATG6a	3A	0.0127	0.049	0.2595
Ta2D_ATG7a	2D	Td2A_ATG7a	2A	0.069	0.0761	0.9071
Ta3A_ATG7b	3A	Td3A_ATG7b	3A	0	0	0
Ta3B_ATG7c	3B	Td3A_ATG7b	3A	0.0231	0.0329	0.7023
Ta3D_ATG7d	3D	Td3A_ATG7b	3A	0.0231	0.0329	0.7023
Ta3A_ATG7b	3A	Td3B_ATG7c	3B	0.0231	0.0329	0.7023
Ta3B_ATG7c	3B	Td3B_ATG7c	3B	0	0	0
Ta3D_ATG7d	3D	Td3B_ATG7c	3B	0.0185	0	¥
Ta6B_ATG8i	6B	Td1B_ATG8a	1B	0.0605	0.0862	0.7015
Ta2A_ATG8a	2A	Td2A_ATG8b	2A	0.0065	0	¥
Ta2B_ATG8c	2B	Td2A_ATG8b	2A	0.0065	0.0646	0.1
Ta2D_ATG8e	2D	Td2A_ATG8b	2A	0.0065	0.0646	0.1
Ta2A_ATG8a	2A	Td2B_ATG8c	2B	0	0.0646	0
Ta2B_ATG8c	2B	Td2B_ATG8c	2B	0	0	0
Ta2D_ATG8e	2D	Td2B_ATG8c	2B	0	0	0
Ta2A_ATG8b	2A	Td2B_ATG8d	2B	0.0064	0.2157	0.0298
Ta2B_ATG8d	2B	Td2B_ATG8d	2B	0	0	0
Ta5A-ATG8f	5A	Td5A_ATG8e	5A	0	0	0
Ta5B_ATG8g	5B	Td5A_ATG8e	5A	0.013	0.0634	0.2059
Ta5D_ATG8h	5D	Td5A_ATG8e	5A	0.0464	0.0874	0.5314
Ta5A-ATG8f	5A	Td5B_ATG8f	5B	0.013	0.0634	0.2059
Ta5B_ATG8g	5B	Td5B_ATG8f	5B	0	0	0
Ta5D_ATG8h	5D	Td5B_ATG8f	5B	0.0465	0.1597	0.2911
Ta6B_ATG8i	6B	Td6B_ATG8g	6B	0.0065	0	¥
Ta4A_ATG9a	4A	Td4A_ATG9a	4A	0	0	0
Ta4B_ATG9b	4B	Td4A_ATG9a	4A	0.0394	0.1348	0.2925
Ta4D_ATG9c	4D	Td4A_ATG9a	4A	0.0187	0.0935	0.1999
Ta4A_ATG9a	4A	Td4B_ATG9b	4B	0.0197	0.1107	0.1782
Ta4B_ATG9b	4B	Td4B_ATG9b	4B	0.0192	0.0358	0.5362
Ta4D_ATG9c	4D	Td4B_ATG9b	4B	0.0234	0.0831	0.2821
Ta2A_ATG10a	2A	Td2A_ATG10a	2A	0.0046	0.0072	0.6315
Ta2B_ATG10b	2B	Td2A_ATG10a	2A	0.0374	0.1323	0.2826
Ta2A_ATG10a	2A	Td2B_ATG10b	2B	0.041	0.1446	0.2836
Ta2B_ATG10b	2B	Td2B_ATG10b	2B	0.0173	0.0107	1.6271
Ta6A_ATG11a	6A	Td6A_ATG11a	6A	0.0049	0.0027	1.848
Ta6B_ATG11b	6B	Td6A_ATG11a	6A	0.0087	0.0726	0.1196
Ta6D_ATG11c	6D	Td6A_ATG11a	6A	0.0097	0.0489	0.1991
Ta6A_ATG11a	6A	Td6B_ATG11b	6B	0.0099	0.0698	0.1424
Ta6B_ATG11b	6B	Td6B_ATG11b	6B	0.0004	0.0053	0.0772
Ta6D_ATG11c	6D	Td6B_ATG11b	6B	0.0089	0.0559	0.1593
Ta6A_ATG12a	6A	Td6A_ATG12a	6A	0.0564	0.0348	1.6189
Ta6B_ATG12b	6B	Td6A_ATG12a	6A	0	0.0173	0
Ta6D_ATG12c	6D	Td6A_ATG12a	6A	0	0.0351	0
Ta6A_ATG12a	6A	Td6B_ATG12b	6B	0.0564	0.0528	1.0665
Ta6B_ATG12b	6B	Td6B_ATG13b	6B	0	0	0
Ta6D_ATG12c	6D	Td6B_ATG14b	6B	0	0.0173	0
Ta7B_ATG12d	7B	Td7B_ATG12c	7B	0.1948	0.2255	0.8641
Ta2A_ATG13a	2A	Td2A_ATG13a	2A	0.0026	0.0106	0.2415
Ta2B_ATG13b	2B	Td2A_ATG13a	2A	0.0077	0.0582	0.1318
Ta2D_ATG13c	2D	Td2A_ATG13a	2A	0.009	0.0657	0.1364
Ta2A_ATG13a	2A	Td2B_ATG13b	2B	0.0051	0.0545	0.0937
Ta2B_ATG13b	2B	Td2B_ATG13b	2B	0	0	0
Ta2D_ATG13c	2D	Td2B_ATG13b	2B	0.0013	0.0359	0.0355
Ta4A_ATG13d	4A	Td4A_ATG13c	4A	0.0012	0.0037	0.3349
Ta4B_ATG13e	4B	Td4A_ATG13c	4A	0.0155	0.0687	0.2261
Ta4D_ATG13f	4D	Td4A_ATG13c	4A	0.0254	0.0618	0.4104
Ta4A_ATG13d	4A	Td4B_ATG13d	4B	0.0168	0.0687	0.2446
Ta4B_ATG13e	4B	Td4B_ATG13d	4B	0	0.0037	0
Ta4D_ATG13f	4D	Td4B_ATG13d	4B	0.0224	0.0713	0.3137
Ta6A_ATG13g	6A	Td6A_ATG13e	6A	0.1794	0.1711	1.0488
Ta6B_ATG13h	6B	Td6A_ATG13e	6A	0.1881	0.2432	0.7736
Ta6D_ATG13i	6D	Td6A_ATG13e	6A	0.1895	0.2249	0.8427
Ta6A_ATG13g	6A	Td6B_ATG13f	6B	0.1938	0.246	0.7877
Ta6B_ATG13h	6B	Td6B_ATG13f	6B	0.1765	0.1747	1.0103
Ta6D_ATG13i	6D	Td6B_ATG13f	6B	0.1908	0.2211	0.8629
Ta1A_ATG14a	1A	Td1A_ATG14a	1A	0.0019	0.0056	0.3362
Ta1B_ATG14b	1B	Td1A_ATG14a	1A	0.0367	0.1199	0.3062
Ta1D_ATG14c	1D	Td1A_ATG14a	1A	0.0386	0.1078	0.3581
Ta2A_ATG14d	2A	Td2A_ATG14b	2A	0	0	0
Ta2B_ATG14e	2B	Td2A_ATG14b	2A	0	0.1259	0
Ta2D_ATG14f	2D	Td2A_ATG14b	2A	0.0046	0.1009	0.0454
Ta5A_ATG14g	5A	Td5A_ATG14c	5A	0.0019	0.0055	0.3406
Ta5B_ATG14h	5B	Td5A_ATG14c	5A	0.0114	0.0694	0.1643
Ta5D_ATG14i	5D	Td5A_ATG14c	5A	0.0114	0.0578	0.197
Ta5D_ATG16a	5D	Td5A_ATG16a	5A	0.0072	0.0732	0.0981
Ta1D_ATG18a	1D	Td1A_ATG18a	1A	0.0027	0.0568	0.0476
Ta1D_ATG18a	1D	Td1B_ATG18b	1B	0.0068	0.0487	0.139
Ta3B_ATG18b	3B	Td3A_ATG18c	3A	0.0248	0.1614	0.1536
Ta3B_ATG18c	3B	Td3B_ATG18d	3B	0	0.0044	0
Ta6B_ATG18d	6B	Td6B_ATG18e	6B	0	0	0
Ta3A_ATG22a	3A	Td3A_ATG22a	3A	0	0	0
Ta3B_ATG22b	3B	Td3A_ATG22a	3A	0.0377	0.0663	0.5695
Ta3B_ATG22c	3B	Td3A_ATG22a	3A	0.0149	0.0228	0.6515
Ta3D_ATG22d	3D	Td3A_ATG22a	3A	0.0442	0.0704	0.6277
Ta3D_ATG22e	3D	Td3A_ATG22a	3A	0.0174	0.0228	0.7616
Ta3A_ATG22a	3A	Td3B_ATG22b	3B	0.0111	0.0228	0.4862
Ta3B_ATG22b	3B	Td3B_ATG22b	3B	0.0326	0.054	0.6037
Ta3B_ATG22c	3B	Td3B_ATG22b	3B	0.0037	0.0075	0.4913
Ta3D_ATG22d	3D	Td3B_ATG22b	3B	0.039	0.0581	0.672
Ta3D_ATG22e	3D	Td3B_ATG22b	3B	0.0111	0.0305	0.3647
Ta4A_ATG27a	4A	Td4A_ATG27a	4A	0.0029	0.0031	0.9301
Ta4B_ATG27b	4B	Td4A_ATG27a	4A	0.0194	0.0254	0.7647
Ta4D_ATG27c	4D	Td4A_ATG27a	4A	0.0185	0.0617	0.2996
Ta4A_ATG27a	4A	Td4B_ATG27b	4B	0.0224	0.0286	0.7838
Ta4B_ATG27b	4B	Td4B_ATG27b	4B	0	0	0
Ta4D_ATG27c	4D	Td4B_ATG27b	4B	0.0106	0.0353	0.3013
Ta2A_ATG101a	2A	Td2A_ATG101a	2A	0.0048	0.0086	0.5603
Ta2D_ATG101b	2D	Td2A_ATG101a	2A	0.0048	0.0906	0.0531
Ta2A_ATG101a	2A	Td2B_ATG101b	2B	0.0048	0.1303	0.0369
Ta2D_ATG101b	2D	Td2B_ATG101b	2B	0	0.0811	0

## Sheet: Additional file 3
Additional file 3. The dN/dS ratios for orthologous ATGs between Triticum aestivum L. and Triticum urartu
Triticum aestivum		Triticum urartu		dN	dS	dN/dS
ID(Name)	Chr.	ID(Name)	Chr.
Ta4A_ATG1a	4A	TuS0_ATG1a	S0	0.0013	0.0085	0.1568
Ta4D_ATG1b	4D	TuS0_ATG1a	S0	0.006	0.0615	0.0978
Ta6A_ATG2a	6A	Tu6A_ATG2a	6A	0.0126	0.0111	1.1315
Ta6B_ATG2b	6B	Tu6A_ATG2a	6A	0.0353	0.058	0.6092
Ta7A_ATG2c	7A	Tu7A_ATG2b	7A	0.0016	0.0031	0.5258
Ta7D_ATG2d	7D	Tu7A_ATG2b	7A	0.0062	0.0216	0.2868
Ta1A_ATG3a	1A	Tu1A_ATG3a	1A	0.0014	0	¥
Ta1B_ATG3b	1B	Tu1A_ATG3a	1A	0.0041	0.0878	0.0469
Ta1D_ATG3c	1D	Tu1A_ATG3a	1A	0	0.072	0
Ta2A_ATG4a	2A	Tu2A_ATG4a	2A	0.0031	0.0602	0.0518
TaUn_ATG4b	Un	Tu2A_ATG4a	2A	0.0876	0.1537	0.5704
Ta2D_ATG4c	2D	Tu2A_ATG4a	2A	0.0157	0.0639	0.2459
Ta6A_ATG5a	6A	Tu6A_ATG5a	6A	0.0112	0.0448	0.2502
Ta6A_ATG5b	6A	Tu6A_ATG5a	6A	0.1022	0.2324	0.4398
Ta6B_ATG5c	6B	Tu6A_ATG5a	6A	0.0287	0.1209	0.2376
Ta6B_ATG5d	6B	Tu6A_ATG5a	6A	0.101	0.2202	0.4586
TaUn_ATG5e	Un	Tu6A_ATG5a	6A	0.1065	0.2322	0.4587
Ta6A_ATG5a	6A	Tu6A_ATG5b	6A	0.1051	0.2117	0.4965
Ta6A_ATG5b	6A	Tu6A_ATG5b	6A	0.01	0.0657	0.1519
Ta6B_ATG5c	6B	Tu6A_ATG5b	6A	0.0984	0.2054	0.4789
Ta6B_ATG5d	6B	Tu6A_ATG5b	6A	0.0188	0.0869	0.2169
TaUn_ATG5e	Un	Tu6A_ATG5b	6A	0.0214	0.083	0.2574
Ta3A_ATG6a	3A	Tu3A_ATG6a	3A	0.0009	0.0029	0.2951
Ta3D_ATG6b	3D	Tu3A_ATG6a	3A	0.011	0.0489	0.224
Ta2D_ATG7a	2D	Tu3A_ATG7a	3A	0.124	0.2397	0.5174
Ta3A_ATG7b	3A	Tu3A_ATG7a	3A	0.0053	0.0108	0.4924
Ta3B_ATG7c	3B	Tu3A_ATG7a	3A	0.0095	0.0226	0.4207
Ta3D_ATG7d	3D	Tu3A_ATG7a	3A	0.0139	0.04	0.3467
Ta2A_ATG8a	2A	Tu2A_ATG8a	2A	0.0041	0.0136	0.2993
Ta2B_ATG8c	2B	Tu2A_ATG8a	2A	0.0041	0.0415	0.0979
Ta2D_ATG8e	2D	Tu2A_ATG8a	2A	0.0041	0.0415	0.0979
Ta2A_ATG8b	2A	Tu2A_ATG8b	2A	0	0.0136	0
Ta2B_ATG8d	2B	Tu2A_ATG8b	2A	0.0041	0.1666	0.0243
Ta5A-ATG8f	5A	Tu5A_ATG8c	5A	0.004	0	¥
Ta5B_ATG8g	5B	Tu5A_ATG8c	5A	0.0309	0.0792	0.3902
Ta5D_ATG8h	5D	Tu5A_ATG8c	5A	0.0371	0.0572	0.6494
Ta4A_ATG9a	4A	Tu4A_ATG9a	4A	0.0005	0.0051	0.0959
Ta4B_ATG9b	4B	Tu4A_ATG9a	4A	0.0199	0.0941	0.2116
Ta4D_ATG9c	4D	Tu4A_ATG9a	4A	0.0113	0.0685	0.1641
Ta2A_ATG10a	2A	Tu2A_ATG10a	2A	0.0206	0.0542	0.3804
Ta2B_ATG10b	2B	Tu2A_ATG10a	2A	0.0441	0.1267	0.3478
Ta6A_ATG11a	6A	Tu6A_ATG11a	6A	0.0031	0.0051	0.6175
Ta6B_ATG11b	6B	Tu6A_ATG11a	6A	0.0067	0.0724	0.0919
Ta6D_ATG11c	6D	Tu6A_ATG11a	6A	0.0076	0.05	0.1527
Ta2A_ATG13a	2A	Tu2A_ATG13a	2A	0.0009	0.0051	0.1819
Ta2B_ATG13b	2B	Tu2A_ATG13a	2A	0.0037	0.0522	0.0706
Ta2D_ATG13c	2D	Tu2A_ATG13a	2A	0.0037	0.0494	0.0746
Ta4A_ATG13d	4A	Tu4A_ATG13b	4A	0.0027	0.0027	0.9865
Ta4B_ATG13e	4B	Tu4A_ATG13b	4A	0.0152	0.0747	0.2039
Ta4D_ATG13f	4D	Tu4A_ATG13b	4A	0.0209	0.0594	0.3517
Ta1A_ATG14a	1A	Tu1A_ATG14a	1A	0	0	0
Ta1B_ATG14b	1B	Tu1A_ATG14a	1A	0.0591	0.1244	0.4748
Ta1D_ATG14c	1D	Tu1A_ATG14a	1A	0.0554	0.1236	0.4483
Ta2A_ATG14d	2A	Tu2A_ATG14b	2A	0.0013	0	¥
Ta2B_ATG14e	2B	Tu2A_ATG14b	2A	0.0051	0.0974	0.0525
Ta2D_ATG14f	2D	Tu2A_ATG14b	2A	0.0045	0.0809	0.0553
Ta5A_ATG14g	5A	Tu5A_ATG14c	5A	0	0.0039	0
Ta5B_ATG14h	5B	Tu5A_ATG14c	5A	0.0065	0.0778	0.084
Ta5D_ATG14i	5D	Tu5A_ATG14c	5A	0.0091	0.0697	0.1311
Ta5D_ATG16a	5D	Tu5A_ATG16a	5A	0.0068	0.0714	0.0954
Ta1D_ATG18a	1D	Tu1A_ATG18a	1A	0.0025	0.0614	0.0414
Ta3B_ATG18c	3B	Tu3A_ATG18b	3A	0.0049	0.0688	0.0715
Ta6B_ATG18d	6B	Tu6A_ATG18c	6A	0.0025	0.1542	0.0162
Ta3A_ATG22a	3A	Tu3A_ATG22a	3A	0.0012	0.0038	0.3252
Ta3B_ATG22b	3B	Tu3A_ATG22a	3A	0.0365	0.0704	0.5181
Ta3B_ATG22c	3B	Tu3A_ATG22a	3A	0.0136	0.0267	0.5102
Ta3D_ATG22d	3D	Tu3A_ATG22a	3A	0.0429	0.0745	0.5756
Ta3D_ATG22e	3D	Tu3A_ATG22a	3A	0.0161	0.0267	0.6041
Ta4A_ATG27a	4A	Tu4A_ATG27a	4A	0.004	0.0024	1.6342
Ta4B_ATG27b	4B	Tu4A_ATG27a	4A	0.0242	0.0455	0.5324
Ta4D_ATG27c	4D	Tu4A_ATG27a	4A	0.0349	0.086	0.4054
Ta2A_ATG101a	2A	Tu2A_ATG101a	2A	0.0041	0.0072	0.5646
Ta2D_ATG101b	2D	Tu2A_ATG101a	2A	0.0041	0.0837	0.0488

## Sheet: Additional file 4
Additional file 4. The dN/dS ratios for orthologous ATGs between Triticum dicoccoides and Aegilops tauschii
Triticum dicoccoides		Aegilops tauschii		dN	dS	dN/dS
ID(Name)	Chr.	ID(Name)	Chr.
Td4A_ATG1a	4A	Aet4D_ATG1a	4D	0.0069	0.0623	0.1101
Td6A_ATG2a	6A	Aet6D_ATG2a	6D	0.0216	0.0454	0.4766
Td6B_ATG2b	6B	Aet6D_ATG2a	6D	0.0282	0.052	0.5418
Td7A_ATG2c	7A	Aet7D_ATG2b	7D	0.0086	0.019	0.4498
Td1A_ATG3a	1A	Aet1D_ATG3a	1D	0	0.072	0
Td1B_ATG3b	1B	Aet1D_ATG3a	1D	0.0041	0.0575	0.0716
Td2A_ATG4a	2A	Aet2D_ATG4a	2D	0.0166	0.0686	0.2414
Td2B_ATG4b	2B	Aet2D_ATG4a	2D	0.0101	0.0909	0.1108
Td6A_ATG5a	6A	Aet6D_ATG5a	6D	0.0839	0.2212	0.3794
Td6B_ATG5b	6B	Aet6D_ATG5a	6D	0.0275	0.0852	0.3233
Td3A_ATG6a	3A	Aet3D_ATG6a	3D	0.0118	0.0489	0.2418
Td2A_ATG7a	2A	Aet2D_ATG7a	2D	0.0742	0.0755	0.9825
Td3A_ATG7b	3A	Aet3D_ATG7b	3D	0.0231	0.0329	0.7023
Td3B_ATG7c	3B	Aet3D_ATG7b	3D	0.0185	0	¥
Td2A_ATG8b	2A	Aet2D_ATG8a	2D	0.0058	0.0595	0.0977
Td2B_ATG8c	2B	Aet2D_ATG8a	2D	0	0	0
Td2B_ATG8d	2B	Aet2D_ATG8b	2D	0	0.126	0
Td5A_ATG8e	5A	Aet5D_ATG8c	5D	0.0058	0.0599	0.0969
Td5B_ATG8f	5B	Aet5D_ATG8c	5D	0.0058	0.1023	0.0568
Td4A_ATG9a	4A	Aet4D_ATG9a	4D	0.0176	0.0935	0.1887
Td4B_ATG9b	4B	Aet4D_ATG9a	4D	0.0245	0.0831	0.2948
Td2A_ATG10a	2A	Aet2D_ATG10a	2D	0.0138	0.108	0.1275
Td2B_ATG10b	2B	Aet2D_ATG10a	2D	0.041	0.1627	0.2518
Td6A_ATG11a	6A	Aet6D_ATG11a	6D	0.0065	0.0459	0.141
Td6B_ATG11b	6B	Aet6D_ATG11a	6D	0.0057	0.0541	0.1046
Td6A_ATG12a	6A	Aet6D_ATG12a	6D	0.005	0.0327	0.1522
Td6B_ATG12b	6B	Aet6D_ATG12a	6D	0	0.0162	0
Td6A_ATG12a	6A	Aet6D_ATG12b	6D	0.1809	0.2813	0.6432
Td6B_ATG12b	6B	Aet6D_ATG12b	6D	0.1872	0.2581	0.7254
Td2A_ATG13a	2A	Aet2D_ATG13a	2D	0.1699	0.1595	1.0655
Td2B_ATG13b	2B	Aet2D_ATG13a	2D	0.153	0.1157	1.3224
Td4A_ATG13c	4A	Aet4D_ATG13b	4D	0.0149	0.0259	0.5731
Td4B_ATG13d	4B	Aet4D_ATG13b	4D	0.0062	0.0284	0.2194
Td6A_ATG13e	6A	Aet6D_ATG13c	6D	0.0257	0.0633	0.4058
Td6B_ATG13f	6B	Aet6D_ATG13c	6D	0.0257	0.0633	0.4056
Td5A_ATG14c	5A	Aet5D_ATG14a	5D	0.0106	0.0796	0.133
Td5A_ATG16a	5A	Aet5D_ATG16a	5D	0.0072	0.0668	0.1075
Td1A_ATG18a	1A	Aet1D_ATG18a	1D	0.0027	0.0487	0.0553
Td1B_ATG18b	1B	Aet1D_ATG18a	1D	0.0067	0.0489	0.1379
Td3A_ATG18c	3A	Aet3D_ATG18b	3D	0.0247	0.172	0.1436
Td3B_ATG18d	3B	Aet3D_ATG18c	3D	0.0026	0.1025	0.0254
Td6B_ATG18e	6B	Aet6D_ATG18d	6D	0.004	0.144	0.0277
Td3A_ATG22a	3A	Aet3D_ATG22a	3D	0.0134	0.0446	0.3003
Td3B_ATG22b	3B	Aet3D_ATG22a	3D	0.0089	0.036	0.2476
Td4A_ATG27a	4A	Aet4D_ATG27a	4D	0.1597	0.2206	0.7239
Td4B_ATG27b	4B	Aet4D_ATG27a	4D	0.1574	0.2206	0.7136
Td2A_ATG101a	2A	Aet2D_ATG101a	2D	0.0024	0.0905	0.0266
Td2B_ATG101b	2B	Aet2D_ATG101a	2D	0.0024	0.0809	0.0297

## Sheet: Additional file 5
Additional file 5. The dN/dS ratios for orthologous ATGs between Triticum dicoccoides and Triticum urart
Triticum dicoccoides		Triticum urartut		dN	dS	dN/dS
ID(Name)	Chr.	ID(Name)	Chr.
Td4A_ATG1a	4A	TuS0_ATG1a	S0	0.0013	0.0085	0.1568
Td6A_ATG2a	6A	Tu6A_ATG2a	6A	0.0041	0.0053	0.7806
Td6B_ATG2b	6B	Tu6A_ATG2a	6A	0.0352	0.0699	0.5042
Td7A_ATG2c	7A	Tu7A_ATG2b	7A	0.0016	0.0021	0.7459
Td1A_ATG3a	1A	Tu1A_ATG3a	1A	0	0	0
Td1B_ATG3b	1B	Tu1A_ATG3a	1A	0.0041	0.093	0.0443
Td2A_ATG4a	2A	Tu2A_ATG4a	2A	0.0018	0.0469	0.039
Td2B_ATG4b	2B	Tu2A_ATG4a	2A	0.0157	0.1002	0.1563
Td6A_ATG5a	6A	Tu6A_ATG5a	6A	0.07	0.0995	0.7033
Td6A_ATG5a	6A	Tu6A_ATG5b	6A	0.0787	0.23	0.3421
Td6B_ATG5b	6B	Tu6A_ATG5b	6A	0.023	0.1232	0.1866
Td3A_ATG6a	3A	Tu3A_ATG6a	3A	0.0017	0.0058	0.2949
Td3A_ATG7b	3A	Tu3A_ATG7a	3A	0.0137	0	¥
Td3B_ATG7c	3B	Tu3A_ATG7a	3A	0.0279	0.0326	0.8548
Td2A_ATG8b	2A	Tu2A_ATG8a	2A	0.0058	0.0193	0.3011
Td2B_ATG8c	2B	Tu2A_ATG8a	2A	0	0.0391	0
Td2B_ATG8d	2B	Tu2A_ATG8b	2A	0.0058	0.1955	0.0297
Td5A_ATG8e	5A	Tu5A_ATG8c	5A	0.0058	0	¥
Td5B_ATG8f	5B	Tu5A_ATG8c	5A	0.0176	0.0807	0.2178
Td4A_ATG9a	4A	Tu4A_ATG9a	4A	0.001	0.0074	0.1384
Td4B_ATG9b	4B	Tu4A_ATG9a	4A	0.0208	0.1024	0.2029
Td2A_ATG10a	2A	Tu2A_ATG10a	2A	0.0115	0.0671	0.171
Td2B_ATG10b	2B	Tu2A_ATG10a	2A	0.0483	0.1527	0.3165
Td6A_ATG11a	6A	Tu6A_ATG11a	6A	0.0016	0.0053	0.3059
Td6B_ATG11b	6B	Tu6A_ATG11a	6A	0.0065	0.0728	0.0889
Td2A_ATG13a	2A	Tu2A_ATG13a	2A	0.0012	0	¥
Td2B_ATG13b	2B	Tu2A_ATG13a	2A	0.0049	0.0522	0.0932
Td4A_ATG13c	4A	Tu4A_ATG13b	4A	0.0012	0	¥
Td4B_ATG13d	4B	Tu4A_ATG13b	4A	0.0096	0.0367	0.2605
Td1A_ATG14a	1A	Tu1A_ATG14a	1A	0.0019	0.0056	0.3351
Td2A_ATG14b	2A	Tu2A_ATG14b	2A	0.0018	0	¥
Td5A_ATG14c	5A	Tu5A_ATG14c	5A	0.0019	0	¥
Td5A_ATG16a	5A	Tu5A_ATG16a	5A	0	0.0029	0
Td1A_ATG18a	1A	Tu1A_ATG18a	1A	0.0013	0	¥
Td1B_ATG18b	1B	Tu1A_ATG18a	1A	0.0081	0.0617	0.131
Td3B_ATG18d	3B	Tu3A_ATG18b	3A	0.0039	0.0636	0.0615
Td6B_ATG18e	6B	Tu6A_ATG18c	6A	0.0027	0.1542	0.0172
Td3A_ATG22a	3A	Tu3A_ATG22a	3A	0.0018	0.0054	0.3256
Td3B_ATG22b	3B	Tu3A_ATG22a	3A	0.0089	0.0247	0.3596
Td4A_ATG27a	4A	Tu4A_ATG27a	4A	0.0019	0	¥
Td4B_ATG27b	4B	Tu4A_ATG27a	4A	0.0193	0.0254	0.762
Td2A_ATG101a	2A	Tu2A_ATG101a	2A	0.0048	0	¥
Td2B_ATG101b	2B	Tu2A_ATG101a	2A	0.0048	0.1206	0.0399

## Sheet: Additional file 6
Additional file 6. The dN/dS ratios for orthologous ATGs between Triticum urartu and Aegilops tauschii
Triticum urartu		Aegilops tauschii		dN	dS	dN/dS
ID(Name)	Chr.	ID(Name)	Chr.
TuS0_ATG1a	S0	Aet4D_ATG1a	4D	0.006	0.0638	0.0942
Tu6A_ATG2a	6A	Aet6D_ATG2a	6D	0.0218	0.041	0.5309
Tu7A_ATG2b	7A	Aet7D_ATG2b	7D	0.0079	0.0223	0.3554
Tu1A_ATG3a	1A	Aet1D_ATG3a	1D	0	0.072	0
Tu2A_ATG4a	2A	Aet2D_ATG4a	2D	0.0147	0.0653	0.2251
Tu6A_ATG5a	6A	Aet6D_ATG5a	6D	0.1261	0.2507	0.5031
Tu6A_ATG5b	6A	Aet6D_ATG5a	6D	0.0188	0.0826	0.2279
Tu3A_ATG6a	3A	Aet3D_ATG6a	3D	0.0101	0.0489	0.2064
Tu3A_ATG7a	3A	Aet2D_ATG7a	2D	0.017	0.0431	0.3952
Tu3A_ATG7a	3A	Aet3D_ATG7b	3D	0.1647	0.2625	0.6273
Tu2A_ATG8a	2A	Aet2D_ATG8a	2D	0.0038	0.0392	0.0961
Tu2A_ATG8b	2A	Aet2D_ATG8b	2D	0.0038	0.1714	0.0219
Tu5A_ATG8c	5A	Aet5D_ATG8c	5D	0.0113	0.0541	0.2082
Tu4A_ATG9a	4A	Aet4D_ATG9a	4D	0.0108	0.0685	0.1569
Tu2A_ATG10a	2A	Aet2D_ATG10a	2D	0.0411	0.112	0.3669
Tu6A_ATG11a	6A	Aet6D_ATG11a	6D	0.005	0.0485	0.1028
Tu6A_ATG12a	6A	Aet6D_ATG12b	6D	0.1586	0.2724	0.582
Tu7A_ATG12b	7A	Aet7D_ATG12c	7D	0.0047	0.1218	0.0385
Tu2A_ATG13a	2A	Aet2D_ATG13a	2D	0.0303	0.0455	0.6647
Tu4A_ATG13b	4A	Aet4D_ATG13b	4D	0.0123	0.0205	0.6004
Tu5A_ATG14c	5A	Aet5D_ATG14a	5D	0.0077	0.0643	0.1205
Tu5A_ATG16a	5A	Aet5D_ATG16a	5D	0.0085	0.0653	0.1303
Tu1A_ATG18a	1A	Aet1D_ATG18a	1D	0.0038	0.0693	0.0551
Tu3A_ATG18b	3A	Aet3D_ATG18c	3D	0.0049	0.0822	0.0599
Tu6A_ATG18c	6A	Aet6D_ATG18d	6D	0.0038	0.1636	0.023
Tu3A_ATG22a	3A	Aet3D_ATG22a	3D	0.0134	0.0503	0.266
Tu4A_ATG27a	4A	Aet4D_ATG27a	4D	0.1529	0.2136	0.7155
Tu2A_ATG101a	2A	Aet2D_ATG101a	2D	0.0068	0.0862	0.0787
