# Supplementary material for: The Landscape of Autophagy-Related (ATG) Genes and Functional Characterization of TaVAMP727 to Autophagy in Wheat
Source: Int J Mol Sci. 2022 Jan 14;23(2):891. doi: 10.3390/ijms23020891 (PMC8776105; doi:10.3390/ijms23020891)
Supplement: Supplementary file 1 [file ijms-23-00891-s001.zip › Table S5.xlsx]

## Sheet: Sheet1
Table S5. The single nucleotide polymorphisms (SNP) number of ATGs in wheat among 93 whole-genome resequencing data of bread wheat and its diploid and tetraploid progenitors
TaATGs	promoter	mRNA	exon	intron
Ta4A_ATG1a	4	0	0	-
Ta4D_ATG1b	0	3	2	1
Ta6A_ATG2a	0	0	0	0
Ta6B_ATG2b	37	92	32	60
Ta7A_ATG2c	0	0	0	0
Ta7D_ATG2d	16	25	7	18
Ta1A_ATG3a	48	34	6	28
Ta1B_ATG3b	47	35	5	30
Ta1D_ATG3c	4	2	11	2
Ta2A_ATG4a	28	79	37	42
TaUn_ATG4b	-	-	-	-
Ta2D_ATG4c	6	14	5	9
Ta6A_ATG5a	23	0	0	0
Ta6A_ATG5b	34	0	0	0
Ta6B_ATG5c	11	91	21	70
Ta6B_ATG5d	23	84	26	58
TaUn_ATG5e	-	-	-	-
Ta3A_ATG6a	25	100	15	85
Ta3D_ATG6b	1	6	1	5
Ta2D_ATG7a	0	28	7	21
Ta3A_ATG7b	4	21	11	11
Ta3B_ATG7c	8	21	9	12
Ta3D_ATG7d	5	1	1	0
Ta2A_ATG8a	39	15	2	13
Ta2A_ATG8b	15	79	10	69
Ta2B_ATG8c	37	31	3	28
Ta2B_ATG8d	5	81	28	53
Ta2D_ATG8e	1	0	0	0
Ta5A_ATG8f	0	0	0	0
Ta5B_ATG8g	1	20	1	19
Ta5D_ATG8h	1	2	1	1
Ta6B_ATG8i	70	12	12	-
Ta4A_ATG9a	10	0	0	0
Ta4B_ATG9b	25	31	9	22
Ta4D_ATG9c	4	2	1	1
Ta2A_ATG10a	18	37	10	27
Ta2B_ATG10b	20	21	7	14
Ta6A_ATG11a	9	0	0	0
Ta6B_ATG11b	23	43	24	19
Ta6D_ATG11c	0	1	1	0
Ta6A_ATG12a	5	0	0	0
Ta6B_ATG12b	14	51	0	51
Ta6D_ATG12c	0	1	0	1
Ta7B_ATG12d	65	16	3	13
Ta2A_ATG13a	8	54	7	47
Ta2B_ATG13b	21	115	8	107
Ta2D_ATG13c	0	1	0	1
Ta4A_ATG13d	0	0	0	0
Ta4B_ATG13e	31	30	10	20
Ta4D_ATG13f	4	1	0	1
Ta6A_ATG13g	5	0	0	0
Ta6B_ATG13h	43	38	16	22
Ta6D_ATG13i	16	2	1	1
Ta1A_ATG14a	5	30	10	20
Ta1B_ATG14b	1	66	13	53
Ta1D_ATG14c	0	0	0	0
Ta2A_ATG14d	5	32	16	16
Ta2B_ATG14e	6	58	19	39
Ta2D_ATG14f	0	1	0	1
Ta5A_ATG14g	0	0	0	0
Ta5B_ATG14h	27	18	4	14
Ta5D_ATG14i	0	4	3	1
Ta5D_ATG16a	11	8	2	6
Ta1D_ATG18a	0	3	2	1
Ta3B_ATG18b	8	61	8	53
Ta3B_ATG18c	13	50	12	38
Ta6B_ATG18d	26	66	16	50
Ta3A_ATG22a	24	32	7	25
Ta3B_ATG22b	42	36	16	20
Ta3B_ATG22c	7	47	6	41
Ta3D_ATG22d	6	10	1	9
Ta3D_ATG22e	1	1	1	3
Ta4A_ATG27a	0	0	0	0
Ta4B_ATG27b	14	26	1	25
Ta4D_ATG27c	0	4	0	4
Ta2A_ATG101a	41	52	19	33
Ta2D_ATG101b	11	2	2	2
