# Supplementary material for: The Landscape of Autophagy-Related (ATG) Genes and Functional Characterization of TaVAMP727 to Autophagy in Wheat
Source: Int J Mol Sci. 2022 Jan 14;23(2):891. doi: 10.3390/ijms23020891 (PMC8776105; doi:10.3390/ijms23020891)
Supplement: Supplementary file 1 [file ijms-23-00891-s001.zip › Table S6.xlsx]

## Sheet: Additional file 1
Additional file 1. Primers of TaVAMP727 and AtATGs for RT-qPCR analysis of TaVAMP727 transgenic Arabidopsis
name	sequence
TaVAMP727-Forward	GTCCACCTACTCCTGCGATG
TaVAMP727-Reverse	TCTAGGAACACAAACGGCAC
ATG1A-Forward	ACAGAAGTACAACGCTTAACG
ATG1A-Reverse	CTGTATTGCCCATCTCGCTAG
ATG1B-Forward	ACTGGCAACAACCTTAGTCG
ATG1B-Reverse	AGACCGGATTCTTGTCAAGC
ATG1C-Forward	GGAAACAGCCAAATTCAGTTGC
ATG1C-Reverse	ATCATATGACTGCCTGTCCG
ATG4A-Forward	ACAACTAGTGACGTATGGCTC
ATG4A-Reverse	CAACCCCAGTTCACATCG
ATG6-Forward	CGATCCGAATCTGCCGAAATG
ATG6-Reverse	CCATGCGTGTTGAACCAAG
ATG8D-Forward	GCGTAGAATCGCTATTTCAGTCC
ATG8D-Reverse	CTCTTCTCGGCTCTTTCGAC
ATG8E-Forward	GTACCTTGTGCCATCAGACC
ATG8E-Reverse	CGTAAACGCTTGACATTAGCTC
ATG8G-Forward	GAGAATCCAACTTAGTGCAGAG
ATG8G-Reverse	GGTAACATACAAGAAGCCGTC
ATG9-Forward	CGCAACCACCAATAGCTTC
ATG9-Reverse	TCGTCCATGAATGTAGTTCTCG
ATG10-Forward	TCAGCGATGGTAGACTCACC
ATG10-Reverse	GATCAGAGGAACCCAAGACC
ATG13-Forward	CTCTTTATGCACAGACTCGG
ATG13-Reverse	CCGATGCACAAAGACGACCAG
ATG13B-Forward	CAGTTGGTGCCCTTGTGAG
ATG13B-Reverse	CCGAGGCTGTGATAGACG
ATG14A-Forward	ACAAGTCGTTTCGTCCCTC
ATG14A-Reverse	GCTTCTCCCGCAACTTAGC
ATG16-Forward	ATGAAGGTGGCTGTGGTTC
ATG16-Reverse	AGTTCCGCTATTGGTGTCC
ATG18H-Forward	AAGTCCGTCGTTTATGACCAC
ATG18H-Reverse	TTTCCTACAACGGAACTTGC
ATG101-Forward	GCAAGTTTCAACAAGGACGATC
ATG101-Reverse	TCACCGCATTGTACATAAGTG
UBQ5-Forward	GACGCTTCATCTCGTCC
UBQ5-Reverse	CCACAGGTT GCGTTAG

## Sheet: Additional file 2
Additional file 2. Primers of TaVAMP727 and TaATGs for RT-qPCR analysis of transgenic wheat
name	sequence
TaVAMP727-Forward	GTCCACCTACTCCTGCGATG
TaVAMP727-Reverse	TCTAGGAACACAAACGGCAC
Ta4A_ATG1a-Forward	CATGGGCAACAATTATGCACC
Ta4A_ATG1a-Reverse	GGATGAACACCTTTAGCACCAC
Ta7D_ATG2d-Forward	GCTCCAGACAGACATCAGT
Ta7D_ATG2d-Reverse	GACCGATTAAATTCTGAGATCTTG
Ta1A_ATG3a-Forward	ATCTGTACATTGTGTCCGTGTG
Ta1A_ATG3a-Reverse	ACAATCTTCCTGCAGAGCATC
Ta2A_ATG4a-Forward	GTCCTACTGCCTGCGTTG
Ta2A_ATG4a-Reverse	CTCTCAGGCAAGCTCGTC
Ta6A_ATG5a-Forward	TGAAATCTGAGATGGGCTCTAGG
Ta6A_ATG5a-Reverse	GGACTAAACTTCCCACTACACC
Ta3A_ATG6a-Forward	AGTTTCAATGTACCTGCGTTGTG
Ta3A_ATG6a-Reverse	ATGTATACCTGTGATATTAGCGAG
Ta2D_ATG7a-Forward	TTCCCGCTTACTCATGACCTGG
Ta2D_ATG7a-Reverse	CACTGGTATTTCCATCTGTATGCC
Ta2A_ATG8a-Forward	CGGCCTGTAAAACTCTATATTACGG
Ta2A_ATG8a-Reverse	ACTCAGTTCTGCTGCCACTA
Ta2B_ATG8d-Forward	CGTACCTATGGCCCTGATGTG
Ta2B_ATG8d-Reverse	TGCGATACTCCCTTAGTCGAAC
Ta5A-ATG8f-Forward	CTCCAGCTTCGCCATTGAC
Ta5A-ATG8f-Reverse	TCCTCCTCGCTGGTTCTCGAG
Ta4D_ATG9c-Reverse	GATTCCTTAGTTTGGCAGCATATGG
Ta4D_ATG9c-Forward	CAAACCCAAGGGCAAGCTC
Ta2A_ATG10a-Reverse	TCCGGATCGCCGACGAAATC
Ta2A_ATG10a-Forward	CGGCAAGCAACGACCAACGAG
Ta6B_ATG11b-Reverse	TGTCCGACCTCATGATGCAG
Ta6B_ATG11b-Forward	CTCGACTATCTATTGCCTCTTCG
Ta6B_ATG12b-Reverse	ACGCCGTTTGAAATTTGACC
Ta6B_ATG12b-Forward	CAGAAAAGGCAGTCTCGCAAG
Ta2A_ATG13a-Reverse	ATCCCGCCACTGTTTATATGCTC
Ta2A_ATG13a-Forward	AAATAAATCCGAATCAGTCCTCGC
Ta6A_ATG13g-Forward	GTGTTGCTGGAAACCCACTGG
Ta6A_ATG13g-Reverse	ATACATCCATTTCTGCGACGAG
Ta1B_ATG14b-Forward	ATTCAACAAAGGCATCCTACGC
Ta1B_ATG14b-Reverse	ATAAGCTCCCGCAGATTACCG
Ta2A_ATG14d-Forward	ACTGGAGCACACGACAATCCC
Ta2A_ATG14d-Reverse	ACACCAAAGTTACCCGAACCAC
Ta5D_ATG14i-Forward	GTGCAGAAAATCTCACCGCTTG
Ta5D_ATG14i-Reverse	AGAGCAGCAAGGCTACACAAC
Ta5D_ATG16a-Forward	TGTAATTGCCGCCTGTAGCTC
Ta5D_ATG16a-Reverse	CTTTTCACCCAGCTTGCGTC
Ta1D_ATG18a-Forward	CACCTTTACAAACTGTATCGTGGC
Ta1D_ATG18a-Reverse	TGGCTGCAAACTTGAATCACC
Ta3B_ATG18b-Forward	GCTGATGTTCCCCATATGAGTCC
Ta3B_ATG18b-Reverse	ATGTATTGCTCACCCTCGTGG
Ta6B_ATG18d-Forward	CCCATGAGTCGCCATTAGCTG
Ta6B_ATG18d-Reverse	ACTTAGTTGCTTGTGCCACG
Ta3B_ATG22c-Forward	ATACGCATTGTCCAATCTCCC			.
Ta3B_ATG22c-Reverse	CCCTTTCGCTTCCTAGTGCTC
Ta2A_ATG101a-Forward	CACCTCTCCGTTGATCGTTTGG
Ta2A_ATG101a-Reverse	GTGGGAATTACATGATTGGATGGG
GA3PD-Forward	GGGCCGCAAGCTTTAACATC
GA3PD-Reverse	GATGCAGCCTTCTCGGTTCT
